# Supplementary material for: Network-based analysis of differentially expressed genes in cerebrospinal fluid (CSF) and blood reveals new candidate genes for multiple sclerosis
Source: PeerJ. 2016 Dec 22;4:e2775. doi: 10.7717/peerj.2775 (PMC5183126; doi:10.7717/peerj.2775)
Supplement: Supplemental Information 3 [file peerj-04-2775-s003.xlsx]

## Sheet: Sheet1
Column1	Column2	Column3	Column4	Column5	Column6	Column7	Column8	Column9	Column10	Column11	Column12	Column13	Column14	Column15	Column16	Column17
NODE	Degree		NODE	BetweennessCentrality		NODE	ClosenessCentrality		NODE	Centroidvalue		NODE	EigenVector		NODE	current flow Betwenness
IKBKG	74		FN1	0.0897973		FN1	0.337911		FN1	15		GABARAPL1	0.265115		FN1	0.0821349
GABARAPL1	73		ESR1	0.0805718		ESR1	0.333737		ESR1	-15		ESR1	0.260627		GABARAPL1	0.0743279
FN1	68		IKBKG	0.0736607		YWHAG	0.327627		IKBKG	-115		FN1	0.215882		IKBKG	0.0726881
ESR1	66		YWHAG	0.0694762		IKBKG	0.327005		YWHAG	-128		YBX1	0.188591		ESR1	0.0716404
YWHAG	66		GABARAPL1	0.0671336		CTNNB1	0.323171		CTNNB1	-142		ARRB2	0.183154		YWHAG	0.070204
GOLGA2	59		PPP1CA	0.0562655		GABARAPL1	0.322415		MCM7	-159		YWHAG	0.172745		ATXN1	0.0652463
ARRB2	52		CTNNB1	0.0465902		MCM7	0.319055		GABARAPL1	-178		EZH2	0.15778		PPP1CA	0.0603827
CTNNB1	49		ATXN1	0.0435302		EZH2	0.314468		SRPK1	-267		EED	0.156397		EED	0.0551961
EED	49		RAC1	0.0421994		PPP1CA	0.313895		EZH2	-275		IKBKG	0.151281		CREB3	0.0513507
PPP1CA	46		SRPK1	0.0412477		SRPK1	0.313824		EED	-284		CTNNB1	0.137512		CTNNB1	0.050248
ATXN1	42		EED	0.0411536		EED	0.311624		TUBA1A	-309		ARRB1	0.129857		SRPK1	0.048772
RAC1	40		GOLGA2	0.0388365		YBX1	0.31078		PPP1CA	-312		ILF2	0.127011		GOLGA2	0.048492
CDKN1A	39		CDKN1A	0.0380465		RAC1	0.308071		CDKN1A	-327		SRPK1	0.126346		ARRB2	0.0469318
YBX1	39		MCM7	0.0374384		RBBP4	0.307178		YBX1	-356		NFKB2	0.123151		RAC1	0.0459649
MCM7	39		CREB3	0.0361518		CDKN1A	0.30629		ARRB2	-363		DHX9	0.113363		CDKN1A	0.0454905
EZH2	38		EZH2	0.0335403		TUBA1A	0.306222		ARRB1	-373		RPS16	0.109768		SFN	0.0444898
ARRB1	38		SFN	0.0322206		SFN	0.304665		SFN	-394		STK4	0.108891		EZH2	0.0411978
SRPK1	37		TNFRSF1A	0.029617		FOS	0.304261		RAC1	-395		MCM7	0.106671		TK1	0.0403513
SFN	36		TK1	0.0289687		RPS16	0.303993		FOS	-400		RBBP4	0.105439		ARRB1	0.0383652
STK4	35		ARRB1	0.0278651		ARRB1	0.303859		RBBP4	-408		MAGOH	0.1009		RB1	0.0377857
TK1	34		ARRB2	0.0276286		C1QBP	0.302791		STK4	-410		THRAP3	0.0938311		MCM7	0.0375723
LNX1	33		RABAC1	0.0265063		ARRB2	0.302724		ILF2	-425		C1QBP	0.0935948		TNFRSF1A	0.0366042
SGTA	33		TUBA1A	0.0259051		ILF2	0.302591		HNRNPH1	-437		HNRNPH1	0.0929082		SGTA	0.035734
RB1	33		RB1	0.0241111		STK4	0.302458		CASP3	-439		HIST1H1C	0.092538		STK4	0.0347757
WDYHV1	32		SGTA	0.0232064		TK1	0.300939		RPS16	-455		SFN	0.0910459		A2M	0.0344096
TNFRSF1A	29		STK4	0.0231265		HNRNPH1	0.300676		NFKB2	-470		XRCC5	0.0905346		IQCB1	0.0343077
SDCBP	28		YBX1	0.0225194		SET	0.299956		C1QBP	-473		TK1	0.0836743		YBX1	0.0337616
NFKB2	28		A2M	0.0223132		NFKB2	0.29963		DHX9	-477		MATR3	0.0826948		LNX1	0.0327643
IQCB1	27		FOS	0.0214071		MYH10	0.2995		S100A8	-478		FUS	0.0818271		CRMP1	0.0298895
CREB3	26		IQCB1	0.0205857		DHX9	0.299175		CRMP1	-483		YBX3	0.0817973		SMAD9	0.0298231
ADAMTSL4	25		LNX1	0.0203927		S100A8	0.29911		THRAP3	-485		ANXA2	0.0806052		RABAC1	0.0296943
PSMA3	25		CRMP1	0.0196597		THRAP3	0.298656		GOLGA2	-494		RPLP2	0.0798968		HDAC11	0.0289496
FOS	24		PTPN11	0.0190407		GOLGA2	0.298075		TNFRSF1A	-496		PPP1CA	0.0786428		PTPN11	0.0285329
LMO2	24		WDYHV1	0.0184807		CASP3	0.297239		TK1	-501		TUBA1A	0.0780448		FOS	0.028401
PTPN11	24		HIF1A	0.0182958		RPLP2	0.297111		RB1	-504		IQCB1	0.076775		WDYHV1	0.0276052
TRIP13	23		CASP3	0.0175455		HSPD1	0.296408		RABAC1	-507		FOS	0.0754152		CDK1	0.0274636
CDK1	23		PSMA3	0.0169902		CRMP1	0.295518		SET	-516		PLEC	0.0753633		RIF1	0.0272206
CRMP1	23		HDAC11	0.0169761		FUS	0.294886		MAGOH	-518		HSPA6	0.0752496		MNDA	0.0271053
CASP3	23		RIF1	0.0165645		JUP	0.294319		HSPD1	-520		JUP	0.0740962		CASP3	0.0269901
XIAP	23		CDK1	0.0165327		TNFRSF1A	0.293942		MYH10	-523		CDKN1A	0.0736232		TUBA1A	0.0267814
MNDA	23		HSPD1	0.0164448		MATR3	0.293754		PSMA3	-524		MYH10	0.0735635		SMAD1	0.0267307
CEP70	23		SMAD1	0.016096		PLEC	0.293004		HSPA6	-528		NONO	0.071199		HIF1A	0.026198
HDAC11	23		SMAD9	0.0152587		RB1	0.292197		MATR3	-529		PTBP1	0.0704636		STK11	0.0259118
TNFRSF1B	22		TLR2	0.0148818		CDKN2A	0.291887		ZAK	-531		DDX27	0.0703521		PSMA3	0.0249574
RIF1	22		FLNB	0.0148199		MAGOH	0.291702		TFG	-539		RPLP0	0.0696327		XIAP	0.0248583
PLSCR1	22		STK11	0.0147102		XRCC5	0.291579		IQCB1	-543		RAC1	0.0683936		PLSCR1	0.0244956
CAV1	21		CAV1	0.0145752		DDX27	0.291332		JUP	-553		ATG5	0.0683589		NFKB2	0.024084
ATG5	21		CBX5	0.0144356		ZAK	0.290901		RPLP2	-560		HADHB	0.0672884		TRIP13	0.0240646
A2M	21		NFKB2	0.0143201		PSMA3	0.29084		ATM	-563		RPS11	0.0666024		CEP70	0.0237583
RABAC1	20		XIAP	0.0140229		CAV1	0.290779		PLEC	-574		HSPD1	0.0657134		TNFRSF1B	0.0234481
FXR2	20		SDCBP	0.0140017		NONO	0.290595		HADHB	-576		TNFRSF1A	0.0649438		SDCBP	0.0233112
TUBA1A	19		TRIP13	0.0131276		HSPA6	0.290595		SGK1	-579		MEX3C	0.0645471		CAV1	0.0229344
HIF1A	19		RBBP4	0.0130385		IQCB1	0.290289		WDYHV1	-581		RPS5	0.0616054		SGK1	0.0228649
CDKN2A	19		CDKN2A	0.0128238		RPLP0	0.290044		ATG5	-582		TUBB6	0.0605759		CDKN2A	0.0227845
SMAD9	19		CEP70	0.0127277		TFG	0.289922		HIST1H1C	-584		S100A8	0.0604973		TLR2	0.0220475
KIFC3	19		MNDA	0.0126748		RABAC1	0.289861		FUS	-595		CDKN2A	0.0598638		FXR2	0.021895
STK11	18		WNK1	0.0125535		FLNB	0.289071		XIAP	-600		GSN	0.0597554		NR4A1	0.0216566
FHL3	18		VCP	0.0124828		TUBB6	0.28901		PPP1CB	-600		FLNB	0.0590465		CBX5	0.021525
ILF2	18		TTN	0.0124725		ANXA2	0.288889		DDX27	-601		TUBA1C	0.0586798		ADAMTSL4	0.0213889
TLE1	18		SGK1	0.0124646		ATM	0.288466		CCND1	-608		RCC2	0.058243		LCK	0.0210432
CBX5	18		SET	0.0124645		ATG5	0.288345		SDCBP	-609		GOLGA2	0.0578579		WAS	0.020645
NR4A1	18		IGHM	0.012297		YBX3	0.288224		CAV1	-610		CASP3	0.0575935		MAPK8IP2	0.0205174
CEP55	18		FXR2	0.0117304		HIST1H1C	0.287983		PPIA	-611		IGF2BP3	0.0569343		VCP	0.0204122
GORASP2	18		RPA2	0.011636		SGK1	0.287503		NONO	-613		PPIA	0.0561995		CD14	0.0203589
RPA2	18		C1QBP	0.0116325		PPP1CB	0.286248		RPLP0	-622		PDIA6	0.0556987		TTN	0.0202833
LCK	17		TNFRSF1B	0.0116249		HIF1A	0.285892		LNX1	-630		IGF2BP1	0.055667		RPA2	0.0200245
MAGOH	17		HNRNPH1	0.0114604		HADHB	0.285655		RCN2	-630		HDGF	0.0552184		LMO2	0.0196067
RIPK2	17		PLSCR1	0.0112273		FLOT1	0.285596		VCP	-631		TUBA1B	0.0539348		PYHIN1	0.0194631
SGK1	17		ATM	0.011088		QARS	0.285537		CDK1	-632		SET	0.0518742		WNK1	0.0194445
C14orf1	17		MAPK8IP2	0.0110154		SDCBP	0.285359		HDAC11	-637		HIF1A	0.0518637		GORASP2	0.0192368
STK3	17		NR4A1	0.0109707		PPIA	0.285064		CDKN2A	-643		TTN	0.0509653		ATG5	0.0191665
BUB1	17		RANBP9	0.0108365		SEPT9	0.284476		TLE1	-647		HNRNPL	0.0509439		APPBP2	0.0186269
PYHIN1	17		JAK1	0.0106661		TTN	0.2843		XRCC5	-648		TFG	0.0507277		DYRK1B	0.0185424
LYN	16		CD14	0.010587		CCND1	0.284182		ATG16L1	-648		RAB7A	0.05028		HSPD1	0.01845
MTOR	16		APPBP2	0.0105557		CDK1	0.284065		YBX3	-652		ZAK	0.0497676		HDGF	0.0182789
APPBP2	16		NEK6	0.0101629		IGHM	0.283773		TUBB2A	-652		HDAC11	0.0496079		AIM2	0.0181604
HAUS1	16		DYRK1B	0.00998482		XIAP	0.283714		A2M	-654		CRMP1	0.0493863		PDGFRB	0.0181416
MAPK8IP2	16		EIF3F	0.0098476		RPS11	0.283539		RIF1	-662		PYHIN1	0.0490328		CEP55	0.0180587
PHC2	16		LCK	0.00971851		ATG16L1	0.283422		NEK6	-668		IGHM	0.0477287		FHL3	0.0178086
CARD9	16		MAGOH	0.0093775		PAICS	0.283422		TNFRSF1B	-672		TLE1	0.0476398		PHC2	0.0177795
TLR2	16		ILF2	0.00925949		TUBB2A	0.283364		FAS	-674		CAV1	0.0472265		BCL6	0.0176667
WAS	16		CEP55	0.00921609		RPA2	0.283015		BID	-675		AURKA	0.047182		C14orf1	0.0174999
HDGF	16		GORASP2	0.00920757		VCP	0.282609		KIFC3	-676		ATG16L1	0.0467524		IGHM	0.0173713
WNK1	15		PHC2	0.0091306		PSMB1	0.282551		FXR2	-678		RCN2	0.0466379		CLEC7A	0.0173235
RBBP4	15		JUNB	0.00909334		RIF1	0.282204		CTNNA1	-682		TNFRSF1B	0.0461781		HSP90B1	0.0172353
VCP	15		RPS16	0.00905868		IGF2BP3	0.282204		TLR2	-683		NCOA3	0.0461365		NCOR2	0.0171988
SMAD1	15		HSP90B1	0.00900551		BID	0.281857		FLNB	-689		PSMB1	0.0461215		RBBP4	0.0171657
NEK6	15		RIN3	0.00883254		NEK6	0.281742		TUBB6	-690		SEPT9	0.0456263		MAGOH	0.0170626
HSPD1	15		S100A8	0.00864728		HDAC11	0.281512		HIF1A	-691		RPL27A	0.0450902		LYN	0.0169421
AURKA	15		CCND1	0.0086414		NDRG1	0.281339		PTBP1	-691		CBX6	0.0448549		RANBP9	0.0167738
C1QBP	15		PRRC2A	0.00860809		NCOA3	0.281224		HSP90B1	-692		STK3	0.0447608		BUB1	0.0166665
BUB1B	15		TCEB1	0.00859659		RCN2	0.281052		NDRG1	-692		RB1	0.0445135		ILF2	0.0166284
AIM2	15		TFG	0.00856579		PTBP1	0.280995		ANXA2	-692		TUBB2A	0.0443651		SREBF2	0.0164215
XRCC5	14		CLEC7A	0.00854468		WDYHV1	0.280766		PTPN11	-702		FLOT1	0.0437724		CTBP2	0.0163894
DHX9	14		FHL3	0.00838173		TLE1	0.280366		LEF1	-703		IFIT2	0.0435132		ATM	0.0163703
EPS8	14		SREBF2	0.00833643		PDIA6	0.280138		CBX5	-707		PAICS	0.0431504		MAP2K1	0.016314
CTBP2	14		HDGF	0.00821267		CTNNA1	0.279911		ATXN1	-711		SEC61B	0.0429919		CARD9	0.0163052
TTN	14		PDGFRB	0.00807602		RIPK2	0.279683		RIPK2	-713		VCP	0.0428435		EPS8	0.016245
DYRK1B	14		PYHIN1	0.00799173		AURKA	0.279627		AURKA	-714		P4HB	0.0423265		KIFC3	0.0161691
JUP	14		CTBP2	0.00792258		TNFRSF1B	0.279513		TRIP13	-725		PSMA3	0.0419367		NEK6	0.0161525
INSR	13		TUBB2A	0.00789546		TLR2	0.27923		SNRPF	-729		NDRG1	0.0409568		TLE1	0.0161434
BCL6	13		FAS	0.00789538		SEC61B	0.279173		TUBA1C	-730		DNAJB11	0.0408185		RHEB	0.0160764
JUNB	13		LRP1	0.00774847		CHEK1	0.279173		CHEK1	-730		CTNNA1	0.0407218		FAS	0.0159161
TFG	13		NONO	0.00773778		FAS	0.27906		RPS11	-731		PRDX1	0.0398937		JUNB	0.0158441
MATR3	13		MTOR	0.00771058		RPS5	0.27906		C14orf1	-741		CBX5	0.0390478		RIPK2	0.0156403
ATG16L1	13		TLE1	0.00765783		A2M	0.278496		MAPK8IP2	-747		H3F3A	0.0379343		JAK1	0.0156358
RPS16	13		C1QA	0.00762108		C14orf1	0.278215		FLOT1	-747		RIF1	0.0368007		AURKA	0.0155924
CD14	13		QARS	0.00756289		RCC2	0.278159		QARS	-748		RIPK2	0.0367475		C1QBP	0.0155745
PTK2	13		RHEB	0.00753923		HNRNPL	0.277767		MAPKAPK3	-749		CDK1	0.036703		CBX6	0.0154346
CBX6	13		PTK2	0.00752923		LNX1	0.277655		HNRNPL	-749		MRPS31	0.0366022		PRKACA	0.0152698
NOD2	13		WAS	0.00742624		TUBA1C	0.277655		TNF	-753		PA2G4	0.0365078		RIN3	0.0151878
PDGFRB	13		ZAK	0.00733102		KANK2	0.277599		MAP2K1	-762		HSP90B1	0.0362875		CCND1	0.0151468
CCND1	12		PPP1CB	0.0073233		HSP90B1	0.277487		ULK1	-765		TNF	0.0359331		TLR4	0.0150918
MAP2K1	12		EPS8	0.00730582		TUBA1B	0.277487		VPS37C	-765		PPP1CB	0.0358021		HNRNPH1	0.0148708
THRAP3	12		LYN	0.0072635		LEF1	0.277431		RANBP9	-766		PRDX6	0.0357352		NOD2	0.0148616
TUBB2A	12		NCOR2	0.00722214		TNF	0.277431		SEPT9	-766		RPA2	0.0356641		FLNB	0.0147354
TEX11	12		ADAMTSL4	0.00722043		PTPN11	0.277152		WNK1	-769		SDCBP	0.0356044		SET	0.0146556
MCRS1	12		EFEMP2	0.00720525		WNK1	0.276985		TTN	-769		ARHGAP32	0.0354863		PTK2	0.0146494
S100A8	12		KIFC3	0.00719178		KIFC3	0.276929		NCOA3	-771		EPB41L3	0.0352046		MTOR	0.0145658
IGHM	12		LMO2	0.00718546		CBX5	0.276596		CEP55	-776		YTHDF2	0.035178		PRRC2A	0.0144909
BID	12		NOD2	0.0071798		STK11	0.27654		STK11	-777		MNDA	0.0351051		TCEB1	0.01439
FAS	12		AIM2	0.00708009		FXR2	0.276374		IGHM	-778		TOP2A	0.0348146		SPRY2	0.0141484
TLR4	12		RIPK2	0.00706214		DNAJB11	0.276263		PPP1R8	-782		NOLC1	0.0346068		EFEMP2	0.0139298
BIRC3	12		AURKA	0.00700864		ANGPTL4	0.276152		PHC2	-782		RTCB	0.0342677		BNIP3L	0.013835
HSP90B1	12		BCL6	0.00692287		RPL27A	0.276042		CCND3	-783		SGK1	0.0341558		S100A8	0.0137896
LEF1	12		CARD9	0.00684005		GSN	0.275655		PAICS	-784		ULK1	0.0338815		STK3	0.0137745
STX11	12		CCR1	0.00681692		PA2G4	0.275325		RPA2	-791		WEE1	0.0336743		MCRS1	0.013751
EPB41L3	12		ATG5	0.00673486		ATXN1	0.275215		NR4A1	-793		QARS	0.033667		EPB41L3	0.0136425
SREBF2	12		MAP2K1	0.00670737		FSCN1	0.27516		H3F3A	-794		MAP2K1	0.033437		LEF1	0.0133981
MEX3C	12		FLOT1	0.00667843		BIRC3	0.27516		BIRC3	-794		CLNS1A	0.0332944		GRN	0.0133219
HNRNPH1	12		VAV2	0.00655293		SNRPF	0.27505		HDGF	-795		CCND1	0.0331464		XRCC5	0.0131764
SET	12		STX11	0.00647932		ATR	0.27494		PTK2	-796		SNRPF	0.0330945		ZAK	0.0131295
ATM	12		UBE2L6	0.00645996		RAB7A	0.27494		ATR	-798		ANGPTL4	0.0330911		RAC2	0.0130822
CLEC7A	12		OCRL	0.00636832		MAP2K1	0.274557		PSMB1	-799		FXR2	0.033075		IRAK2	0.013052
IRAK2	11		TLR4	0.00634424		MUC1	0.273684		DYRK1B	-802		STK11	0.0328132		SAT1	0.0130293
ZAK	11		SLC38A1	0.00629164		ULK1	0.273467		PKP3	-804		BID	0.0326368		PPP1CB	0.0129682
CKS1B	11		JUP	0.00623516		LCK	0.273304		IGF2BP3	-805		PRDX4	0.0323959		CD9	0.0129258
CREB5	11		XRCC5	0.00623029		PYHIN1	0.273142		GORASP2	-805		TXN	0.0320272		HAUS1	0.0128244
PPP1CB	11		GRN	0.00622869		MAPK8IP2	0.273033		CHCHD3	-806		CBX3	0.0318444		TNK2	0.012789
VPS37C	11		HDAC7	0.00608258		RANBP9	0.272979		P4HB	-806		RASSF2	0.0315726		QARS	0.012654
NCOR2	11		ATG16L1	0.00604572		MAPKAPK3	0.272925		SAT1	-806		MCM4	0.0314594		TUBB2A	0.0126153
CDR2	11		CBX6	0.00601958		CBX3	0.272763		PAFAH1B3	-809		ATM	0.0312732		RPS16	0.0126094
PTPRC	11		SPRY2	0.00589694		STX11	0.272547		RPS5	-809		C14orf1	0.0312618		STX11	0.0124955
PRKACA	11		IRAK2	0.00579534		PTK2	0.272278		CBX6	-811		GTF3C1	0.0311566		PTPRC	0.0124747
RANBP9	11		SAT1	0.00576481		EIF3F	0.272224		DVL1	-817		MKI67	0.0306791		FLOT1	0.0124704
HDAC7	11		PPP1R8	0.00575971		BAIAP2	0.272117		CEP70	-821		NDRG2	0.0304167		WRAP73	0.0122148
TNF	11		CTSB	0.00567912		YTHDF2	0.271956		MUC1	-821		CHEK1	0.0299211		JUP	0.0121293
FUS	11		RCN2	0.00566464		TRIP13	0.271902		DZIP3	-823		JARID2	0.0298948		BUB1B	0.0121256
HIST1H1C	11		PRKACA	0.00562391		DVL1	0.271206		TXN	-825		WDFY3	0.0295801		THRAP3	0.012088
PRDX4	11		RGS2	0.00558939		PPP1R8	0.271046		LCK	-828		DGKE	0.0294609		INSR	0.0120573
SNRPF	10		SNRPF	0.00553124		HDGF	0.270567		ARHGAP32	-829		RPS27	0.0292119		EIF3F	0.0120365
IRAK4	10		POM121	0.00548682		TXN	0.270249		IGF2BP1	-830		ITGA4	0.0291426		C3	0.0119784
YBX3	10		MYH10	0.0054041		ARHGAP32	0.270037		RIN3	-831		MAPKAPK3	0.0289758		HDAC7	0.0119019
H3F3A	10		DMD	0.00539874		IGF2BP1	0.269984		TUBA1B	-837		MUC1	0.0289431		BID	0.0118756
GRN	10		MCRS1	0.00537574		PHC2	0.269879		NCF2	-838		SSR4	0.0289258		PRDX4	0.0118573
SAT1	10		NME1	0.00535547		STK3	0.269826		DDAH2	-839		RABAC1	0.0288026		ZNF587	0.011856
PAFAH1B3	10		TNK2	0.00531884		PRDX6	0.26972		PYHIN1	-839		ATR	0.0287441		C1QA	0.0118513
EEF1D	10		THRAP3	0.00531315		NDRG2	0.269615		STK3	-841		MAPK8IP2	0.0286475		ORC5	0.0118356
POM121	10		EPB41L3	0.00526954		H3F3A	0.269509		PRRC2A	-841		FSCN1	0.0286245		TFG	0.0117886
RAC2	10		DUSP23	0.0052601		P4HB	0.269193		PDIA6	-841		CCT8	0.0283547		MATR3	0.0116672
BAIAP2	10		EEF1D	0.00524968		NR4A1	0.269141		BCL2	-841		WDYHV1	0.0282029		MAD2L1	0.0116551
MOB1B	10		MATR3	0.00524801		DYRK1B	0.269088		STX11	-842		MPP1	0.0280758		MYB	0.0116383
RHEB	10		INSR	0.0052353		EPB41L3	0.268983		ABLIM1	-843		LEF1	0.0278652		ATG16L1	0.0115971
SPRY2	10		ITGB3	0.00523376		PKP3	0.268983		POM121	-844		RCC1	0.0274721		HCK	0.0115969
PSMB1	10		C14orf1	0.00512336		MKI67	0.268931		MAD2L1	-846		FAS	0.0273368		RGS2	0.0114009
MAPRE3	10		PLEC	0.00512224		DYRK1A	0.268878		MEX3C	-848		TLR2	0.0273186		EEF1D	0.0113616
TFPT	10		TECR	0.00509698		CHCHD3	0.268826		PLSCR1	-849		LMNA	0.0271553		GSK3A	0.0112895
MAD2L1	10		ORC5	0.00502348		PELI2	0.268041		LMO2	-851		ECH1	0.0268497		NONO	0.0112882
HADHB	10		IRAK3	0.0050082		WDFY3	0.267937		LYN	-853		ALDH2	0.0268391		CCND3	0.0112237
MORF4L2	10		IL6ST	0.00498504		RASSF8	0.267729		FTH1	-853		A2M	0.0265726		BIRC3	0.0111431
ORC5	10		TOB1	0.00494319		QKI	0.267677		SREBF2	-857		SMCHD1	0.0265223		OGT	0.010984
GATA2	10		PTPRC	0.00491056		CEP55	0.267521		BAIAP2	-858		KANK2	0.0262473		IL1R1	0.0109779
ZWINT	10		PRDX4	0.00490831		CCND3	0.267469		RHEB	-858		WNK1	0.026205		POM121	0.0108501
RICTOR	10		OGT	0.00489003		CBX6	0.267417		SEC61B	-858		NME1	0.0259813		CTSB	0.0107145
BCL2	10		FAM46A	0.00486094		PRDX1	0.267417		DNAJB11	-859		MIF	0.0258005		UBE2L6	0.0106259
CCND3	9		APOD	0.00485196		RPS27	0.267313		NOD2	-859		HDAC7	0.0257995		BCL2	0.0105989
NME1	9		RAC2	0.00484471		TOP2A	0.267313		CARD9	-860		NEK6	0.025722		SNRPF	0.0105943
IL1R1	9		PAICS	0.00484137		HDAC7	0.267261		ANGPTL4	-861		DDAH2	0.0256587		LRP6	0.0104756
SUMO2	9		GSK3A	0.0047853		ITGA4	0.26721		WDFY3	-869		PSMB3	0.0254029		C8orf33	0.0104712
NCOA3	9		CCND3	0.00475494		CLNS1A	0.267158		GRN	-870		ATAD2	0.025389		IRAK3	0.0104034
PLEC	9		KANK2	0.00470962		PRRC2A	0.266951		GSN	-870		PKP3	0.0252282		SLC38A1	0.0103922
JAK1	9		ATF7IP	0.00470538		MPP1	0.266899		RAC2	-871		XIAP	0.0252194		FUS	0.0103352
WRAP73	9		LEF1	0.00466865		LMNA	0.266847		SMAD9	-874		PELI2	0.0250692		CEBPB	0.0103306
MYB	9		BID	0.0046306		ZC3H18	0.266796		RCC2	-876		TEX10	0.0248819		DYRK1A	0.0102536
EFEMP2	9		OLA1	0.0046139		ITGB3	0.266692		PRDX1	-879		CEBPB	0.0248591		ITSN1	0.0102178
CEBPB	9		PSMB1	0.00460058		CEBPB	0.266486		KANK2	-886		PTPN11	0.0247672		NME1	0.010182
NONO	9		BUB1B	0.00458248		LYN	0.266435		CDK5	-886		RBM28	0.0246031		DHX9	0.0101366
RCN2	9		IL1R1	0.00457343		MEX3C	0.266332		FHL3	-890		BIRC3	0.0244867		UBE2J1	0.0101026
QARS	9		MORF4L2	0.00454762		KIAA1598	0.26628		CLEC7A	-890		DYRK1A	0.0244707		LRP1	0.0100397
CD9	9		ID2	0.00449816		PRDX4	0.266126		LMNA	-890		STK38	0.0243594		RCN2	0.00999645
WDFY3	9		C8orf33	0.00447551		SREBF2	0.266075		ZNF587	-891		AIM2	0.0243588		TNF	0.00996512
OGT	9		CCT8	0.00446582		WEE1	0.266023		IFIT2	-894		SEC24A	0.0240818		CREB5	0.00995571
RPS11	9		DYRK1A	0.00445016		NME1	0.265869		INSR	-895		LCK	0.0238733		HIST1H1C	0.00993525
DYRK1A	9		RPS27	0.00444538		RXRA	0.265869		NCOR2	-897		LNX1	0.0238723		PCGF2	0.0098586
DMD	9		P4HB	0.00443562		RTCB	0.265869		STX17	-897		FEN1	0.0237913		VPS37C	0.00984294
FLOT1	9		CBX3	0.00443502		PTPRC	0.265562		AIM2	-897		EIF4G1	0.0236869		PSMB1	0.00984168
DDAH2	9		CEBPB	0.0044283		NCF2	0.265459		MSH6	-899		DFFA	0.0236704		PLA2G4A	0.00982799
CTNNA1	9		ITSN1	0.00441224		VPS37C	0.265153		CREB5	-901		FXR1	0.0234907		OCRL	0.00978624
MYH10	9		MPP3	0.00438246		SAT1	0.264898		MCM4	-901		ZC3H18	0.0234046		VAV2	0.00974633
HSPA6	9		CD9	0.00435244		BCL2	0.264898		HAUS1	-901		KIAA1598	0.0233075		MEX3C	0.00973622
HCK	9		FBXO32	0.00434781		PSMB3	0.264898		RTN4	-903		PHC2	0.0231495		H3F3A	0.00967384
CCNA2	9		GLI3	0.00434781		DDAH2	0.264745		PRDX4	-904		SAMD4A	0.0229153		YBX3	0.00966678
LRP6	9		HADHB	0.00432103		DZIP3	0.264644		NME1	-909		SMO	0.0227512		FSCN1	0.00961524
ZNF587	9		DHX9	0.00429448		RCC1	0.264644		GATA2	-912		ASF1A	0.0225886		CXCL8	0.00959391
GATAD2B	9		QKI	0.00429225		RIN3	0.264339		ORC5	-913		BAIAP2	0.0225424		PAFAH1B3	0.00958118
C8orf33	9		STK3	0.00425974		GAB2	0.264339		C8orf33	-913		RACGAP1	0.0225023		HADHB	0.0095149
BNIP3L	9		ZNF587	0.00425013		CYFIP1	0.264339		RPL27A	-914		HLX	0.0223829		DDAH2	0.00950644
CDC45	9		BNIP3L	0.00423667		EGR1	0.264238		MBIP	-915		QKI	0.0223641		TEX11	0.00950349
KANK2	9		WDFY3	0.00423656		SMAD9	0.264035		MNDA	-916		EIF4B	0.0222999		TRIM8	0.0094358
C3	8		CTNNA1	0.00420606		SAMD4A	0.264035		EPB41L3	-917		ADRB1	0.0222999		RPS27	0.00942581
PLA2G4A	8		FSCN1	0.00418363		MCM4	0.263985		CDC45	-917		PFKFB3	0.0222999		GATAD2B	0.00937972
IRAK3	8		RTN4	0.00414058		GRN	0.263934		L3MBTL1	-918		CHCHD3	0.0220524		MOB1B	0.00934923
TCEB1	8		C3	0.00413055		PAFAH1B3	0.263833		DYRK1A	-919		KCNAB1	0.0220498		MORF4L2	0.00928555
C1QA	8		WRAP73	0.00412175		RASSF2	0.263732		RXRA	-919		H1F0	0.0220317		CD40	0.00928105
VAV2	8		DDX27	0.00410789		SSR4	0.263682		SELENBP1	-919		PSMB9	0.0219663		CASK	0.00926499
RIN3	8		FUS	0.00410558		RACGAP1	0.263379		PARD6B	-922		KIFC3	0.0218782		MCL1	0.00922295
RGS2	8		RPAP3	0.00409386		GORASP2	0.263279		PTPRC	-925		CLK3	0.0218334		LRSAM1	0.00916291
CBX3	8		CD40	0.00408688		MBIP	0.263279		CTSB	-926		MRTO4	0.0218151		LAMC3	0.00916109
NCF2	8		GMNN	0.00407739		APOD	0.263128		DGKE	-927		RANBP9	0.0216511		KANK2	0.00913466
PPP1R8	8		BUB1	0.00407493		NCKIPSD	0.263128		PA2G4	-927		DDX54	0.0210689		FTH1	0.00910318
RASSF2	8		MAD2L1	0.00405344		L3MBTL1	0.263128		OTUB1	-928		APOD	0.0210644		CBX3	0.00909325
MCM4	8		BCL2	0.00403422		OLA1	0.263078		FSCN1	-930		KLK9	0.0209293		PPP1R8	0.00909075
RPS27	8		SUMO2	0.0040326		DFFA	0.262927		SPRED1	-930		PTK2	0.02085		CCNA2	0.00907987
TNK2	8		IL1B	0.00399998		LGALS9	0.262726		SOD2	-931		IRS2	0.0208384		CKS1B	0.00906935
MCL1	8		CTSL	0.00395552		DAB2	0.262726		MCL1	-934		DYRK1B	0.0206873		CCT8	0.00906239
CASP9	8		TNF	0.00392444		NEK2	0.262676		RAB7A	-934		DOK1	0.0206521		SUMO2	0.00903722
CTSB	8		TRIM8	0.0038543		DGKE	0.262676		EEF1D	-936		TECR	0.0206452		AKAP9	0.00901925
NDRG1	8		HSH2D	0.00381004		MNDA	0.262576		DPYSL2	-938		ARHGAP21	0.0206173		PLAUR	0.00897555
FSCN1	8		LRP6	0.00374279		CDK5	0.262476		RPS27	-941		NR4A1	0.0205977		CTNNA1	0.00893804
PCGF2	8		MCL1	0.00369326		SMCHD1	0.262376		MORF4L2	-941		GAB2	0.0205578		DUSP23	0.00892083
RPLP0	8		LGALS9	0.00368639		CEP70	0.262276		RASSF8	-941		RASSF8	0.0204603		IRAK4	0.00889032
QKI	8		GNB5	0.00368439		ABLIM1	0.262177		ARHGDIB	-942		CLINT1	0.0203783		RPS11	0.00885535
PTBP1	8		MVP	0.00363929		CDC45	0.262077		MTOR	-946		EIF3F	0.0203279		MYH10	0.00881398
MBIP	8		RACGAP1	0.00361256		NOD2	0.262027		DUSP23	-947		STX11	0.0200352		P4HB	0.00869859
BLM	8		TEX11	0.00360996		FEN1	0.262027		HDAC7	-950		RXRA	0.0200295		CCR1	0.0086893
RPLP2	8		ALDH2	0.00357463		TECR	0.261629		JARID2	-951		PNRC2	0.0199948		RACGAP1	0.00866054
SLC38A1	8		SMC4	0.00356776		ORC5	0.261579		EGR1	-951		INSR	0.0199691		PLEC	0.00859517
UCHL5	8		DNAJB11	0.00356026		IRS2	0.261579		RGS2	-952		LYZ	0.0199417		RTN4	0.00859179
OCRL	8		HIST1H1C	0.00355231		CORO1C	0.261579		SSR4	-952		LGALS9	0.0199101		DTNB	0.00857652
PECAM1	8		CEBPA	0.00353548		EPN1	0.261579		LTA	-953		TRIP13	0.0199045		CATSPER1	0.00855091
GSK3A	8		ABCA1	0.00352668		RHEB	0.261381		GTF3C1	-955		SH3BP4	0.0198439		TFPT	0.0084765
FLNB	8		SOD2	0.00350798		EIF4G1	0.261381		UBE2E2	-956		PAFAH1B3	0.0197912		MAPKAPK3	0.00847625
CHEK1	8		VPS37C	0.00346763		MRPS31	0.261084		SGTA	-958		ITGB3	0.0195494		NDRG1	0.00845791
CEBPA	7		AKAP9	0.00346601		POM121	0.260985		ZC3H18	-959		DAB2	0.0195422		EXOSC8	0.00841928
CHCHD3	7		HCK	0.0034496		EEF1D	0.260886		CREB3	-963		SOD2	0.0195362		FAM46A	0.00841654
P4HB	7		DTNB	0.0033981		RTN4	0.260639		FANCI	-963		EPN1	0.0194594		UCHL5	0.00837939
MAPKAPK3	7		PLA2G4A	0.00339197		NCOR2	0.26059		CCNA2	-963		L3MBTL1	0.0194587		PAICS	0.00837001
DNAJB11	7		HSPA6	0.00336175		PECAM1	0.26059		TSGA10	-966		CXCL1	0.0194134		SOD2	0.00835789
RACGAP1	7		BIRC3	0.00335824		FTH1	0.260491		KIAA1598	-969		DUSP23	0.0193932		HSPA6	0.00832983
ITSN1	7		HAUS1	0.00333336		SELENBP1	0.260491		SMAD1	-970		SUB1	0.0193141		RPLP0	0.00830431
TIFA	7		EXOSC8	0.00332962		LMO2	0.260442		FXR1	-973		LGMN	0.0191818		ITGB3	0.00824705
ABCA1	7		MYB	0.00332833		GSK3A	0.260393		BNIP3L	-973		GALK1	0.0191229		ABCA1	0.00815783
ROPN1	7		RPLP0	0.00331721		PLSCR1	0.260295		CBX3	-974		SMC4	0.0190075		LGALS9	0.00814081
HNRNPL	7		CCR10	0.00331332		CCT8	0.260295		ZFP64	-974		DSC2	0.0188876		TAL1	0.00811359
FTH1	7		RPS11	0.00322877		CAMSAP2	0.260246		WEE1	-974		WBP2	0.0188876		WDFY3	0.00810883
DDX27	7		CKS1B	0.00319936		NOLC1	0.260246		CD40	-975		PLOD1	0.0188876		PFDN1	0.00809753
ULK1	7		SNCA	0.00317528		DUSP23	0.260196		LBP	-976		SERPINB13	0.0188876		ZWINT	0.00807863
DZIP3	7		PDIA6	0.00317219		SEC24A	0.260196		ADAMTSL4	-978		FAM91A1	0.0188876		HEYL	0.0080593
PRRC2A	7		NDRG1	0.0031422		CLK3	0.260049		WAS	-979		APOBEC3B	0.0188876		AIP	0.00805917
NDNL2	7		WWP2	0.00313438		H1F0	0.26		TXNDC11	-981		RPL10L	0.0188876		MUC1	0.0080051
TRAF3IP2	7		DLG4	0.00312859		FBLN1	0.259902		AXL	-981		NUPL2	0.0188876		GATA2	0.00800113
PRDX1	7		LRSAM1	0.00311213		RABEP1	0.259902		NEK2	-982		NCKIPSD	0.0188813		ATF7IP	0.00795282
DTNB	7		GATA2	0.00311112		SLC3A2	0.259853		NDRG2	-982		MED17	0.0187962		DMD	0.00794098
EXOSC8	7		RICTOR	0.00310433		ALDH2	0.259755		EIF3F	-984		KIAA0930	0.0187933		LBP	0.00793696
TAL1	7		HEYL	0.00308331		MSH6	0.259706		GAS7	-984		RALGPS2	0.0187933		FRAT1	0.00793251
CLK3	7		NUDT3	0.00308243		LRP6	0.259657		WRAP73	-985		SHCBP1	0.0187933		SDC1	0.00792472
MUC1	7		URI1	0.00307142		MCL1	0.259608		JUNB	-987		CAMSAP2	0.0187621		CHEK1	0.00792201
DCTD	7		ETV5	0.00297023		FHIT	0.259559		SPRY2	-987		PTPRC	0.0186973		WBP11	0.00784142
PAICS	7		AXL	0.00296117		SPRED1	0.259413		USP32	-988		DVL1	0.0186406		GPS2	0.00777029
RHOJ	7		ADAMTS10	0.00294973		ATAD2	0.259217		YTHDF2	-989		GNB4	0.0185679		DNAJB11	0.00772447
NUF2	7		ACVR1B	0.00294821		CARD9	0.25912		CHN2	-989		PLA2G7	0.0185679		NCOA3	0.0076678
PTPN22	7		ZBP1	0.00292853		ECH1	0.259071		IRAK2	-990		ATAD3C	0.0185679		RICTOR	0.00757397
LBP	7		ZWINT	0.00292659		C8orf33	0.259023		EPS8	-994		LANCL1	0.0185679		CDR2	0.00751521
PFDN1	7		PINK1	0.00291179		IFIT2	0.258925		TCAP	-994		ATXN1	0.0185315		BAIAP2	0.00751366
SOD2	7		VEGFA	0.0029017		CLEC7A	0.258877		MKI67	-995		FHIT	0.0183757		CTSL	0.00749292
DLG4	7		SUFU	0.0029017		RBM28	0.258731		EFEMP2	-997		OLA1	0.0183621		OLA1	0.00745975
EIF4G1	7		MYOG	0.0029017		MRTO4	0.258537		MCRS1	-997		CYFIP1	0.0183371		AXL	0.00741146
RTN4	7		APLP2	0.0029017		AIM2	0.25844		F13A1	-997		ORC5	0.0181875		DZIP3	0.00740352
ABI3	7		TSTA3	0.00290065		RAB11B	0.258391		PIGR	-998		PECAM1	0.0181751		PTPRO	0.0073662
CDK5	7		SEC61B	0.0028622		JARID2	0.258391		FRAT1	-1000		SAT1	0.018097		RAB5A	0.00735217
IFIT2	7		PPIA	0.00285224		FXR1	0.258197		PAXIP1	-1003		SLC3A2	0.0177677		QKI	0.00734804
ENG	6		NEK2	0.00284688		GTF3C1	0.258197		PRKACA	-1003		NAA10	0.0176723		SETD1A	0.00733791
CDA	6		SEPT9	0.00284519		ARHGDIB	0.258149		PTPN22	-1004		STRBP	0.0176722		MVP	0.00729647
PTX3	6		PDGFB	0.00284107		IL1B	0.257763		GPS2	-1004		CORO1C	0.0174364		ABLIM1	0.00723476
TUBA1B	6		TRAF3IP2	0.00283746		PTPRO	0.257763		GAB2	-1007		NOC2L	0.0172956		CDC45	0.00720708
IL6ST	6		CHCHD3	0.00282141		UBE2E2	0.257715		CYFIP1	-1007		MSH6	0.0172795		IL1B	0.00715572
ATF7IP	6		SIGLEC5	0.00281061		MTOR	0.257618		RAI1	-1008		IRAK2	0.0172653		EIF4G1	0.00714155
ITGB3	6		BAIAP2	0.00280596		RAC2	0.25757		RICTOR	-1011		LRP6	0.0172483		FHOD1	0.00711853
UBE2L6	6		SHMT2	0.00278628		HGF	0.257378		CKS1B	-1012		EGR1	0.0171811		CHCHD3	0.00710757
SETD1A	6		MASP1	0.00277359		TBL1X	0.25733		SAMD4A	-1013		PFDN1	0.0170882		ALDH2	0.00706873
CATSPER1	6		CLK3	0.00276988		MAD2L1	0.257234		ZWINT	-1014		ZFR	0.01697		MASP1	0.00706549
WBP11	6		CREB5	0.00275266		CREB5	0.257138		TLR1	-1015		LTA	0.0169302		HSH2D	0.00706049
TXN2	6		EIF4G1	0.00274708		GIPC1	0.25709		BUB1B	-1016		TONSL	0.0168932		SH3BP2	0.00703957
MEOX1	6		MKI67	0.00274176		STX17	0.256754		ARHGAP21	-1017		LYN	0.0168695		CDK5	0.00701268
PSME1	6		YBX3	0.00272586		INSR	0.256611		JAK1	-1018		BUB1	0.0168354		CEBPA	0.00700089
DFFA	6		PAFAH1B3	0.00268861		ABCA1	0.256611		RASSF2	-1019		FBLN1	0.0167507		PTBP1	0.00698824
ZFP64	6		MAPKAPK3	0.00267112		SGTA	0.256324		CCT8	-1020		MTOR	0.0167068		IGSF21	0.00695887
ALDH2	6		UCHL5	0.00265288		KLK9	0.256277		NUDT3	-1020		EPB41L2	0.0166819		TBL1X	0.00695448
PDE6D	6		SETD1A	0.00259698		PARD6B	0.256229		BCAS3	-1021		RAB11B	0.0166727		RXRA	0.00695015
IGF2BP1	6		IRS2	0.00259662		ZNF587	0.256039		SEC24A	-1022		ATP1B1	0.0166195		TXN	0.00694312
IGF2BP3	6		CATSPER1	0.00257996		SH3BP4	0.255991		HEYL	-1023		NOD2	0.016448		PDGFB	0.00690578
MKI67	6		PTPN22	0.00257891		DPYSL2	0.255944		RABGAP1L	-1023		WRAP73	0.0164452		PTPN22	0.00690549
TRIM8	6		UBE2E2	0.00256049		LAD1	0.255944		PECAM1	-1024		LIG3	0.0163708		MPP3	0.00674623
UBE2E2	6		SEC24A	0.00253553		SOD2	0.255848		TOP2A	-1026		GORASP2	0.0163549		HP	0.00673813
CTAGE5	6		FHOD1	0.00253037		SMC4	0.255706		RACGAP1	-1026		SELENBP1	0.0163472		ABI3	0.00673564
TSGA10	6		CXCL8	0.00252658		OTUB1	0.255706		BUB1	-1028		ABCA1	0.0163333		DDX27	0.0067232
HSD17B14	6		RPLP2	0.0025187		SUB1	0.255659		CYBB	-1028		RIN3	0.0161707		GNB5	0.00670817
SNCA	6		PLAUR	0.00251026		LTA	0.255327		GATAD2B	-1028		ABLIM1	0.0161702		GMNN	0.0067054
EIF3F	6		RXRA	0.00250135		JUNB	0.25528		SNCA	-1029		MCL1	0.0160988		UBE2E2	0.00669242
TXN	6		WBP11	0.00248692		DOK1	0.255185		MAPRE3	-1030		HGF	0.0160196		RPLP2	0.00665854
SMC6	6		IGF2BP3	0.00248543		C19orf57	0.255138		STAMBPL1	-1030		SPRED1	0.0159773		RASSF2	0.00665054
CASK	6		FTH1	0.00247763		EPB41L2	0.255043		PLA2G4A	-1031		GSK3A	0.0159352		TRAF3IP2	0.00664484
TUBA1C	6		CHEK1	0.00247371		EPS8	0.254996		ALDH2	-1031		SREBF2	0.0159199		TSGA10	0.00659397
SEC61B	6		UBE2J1	0.00246577		SMAD1	0.254808		NCKIPSD	-1031		CDC45	0.0157994		MCM4	0.00658559
ANGPTL4	6		PFDN1	0.00244536		KIAA0930	0.254619		PRDX6	-1031		NEK2	0.0157881		STX17	0.00658113
CD40	6		PCGF2	0.00239212		RALGPS2	0.254619		DFFA	-1035		CDK5	0.0156174		HNRNPL	0.0065691
PTPRO	6		TFPT	0.00237011		SHCBP1	0.254619		CASP9	-1037		ARHGEF11	0.0156094		PSME1	0.00656136
STX17	6		H3F3A	0.00232889		HEYL	0.254572		NUPR1	-1037		USF2	0.0155916		ANGPTL4	0.00652275
ALOX5	6		MS4A1	0.00232483		CTSB	0.254525		GIPC1	-1041		ARL2	0.0155187		ID2	0.00650944
AKAP9	6		GATAD2B	0.00231981		ARL2	0.254431		AKAP9	-1041		CD79A	0.0153801		GAS7	0.00641857
PLAUR	6		TXN	0.00230938		TXNDC11	0.25429		TEX11	-1042		GSTO1	0.0153801		CYBB	0.00637062
CCT8	6		ULK1	0.00230373		IRAK2	0.253775		CEBPB	-1042		STON2	0.0153801		SPP1	0.00633076
MVP	6		DZIP3	0.00229542		OSBPL10	0.253729		LRP6	-1043		STOM	0.0153801		PDLIM7	0.00631814
SEPT9	6		SH3BP2	0.00229325		FGR	0.253682		PDGFRB	-1044		FERMT3	0.0153801		DLG4	0.00631182
TUBB6	6		LBP	0.00229019		LYZ	0.253682		ECH1	-1045		COPE	0.0153801		TXNDC11	0.00628415
PPIA	6		DDAH2	0.00228439		MORF4L2	0.253589		FHIT	-1045		BMP2K	0.0153801		PECAM1	0.00627373
LAMC3	6		CASK	0.00226654		HAUS1	0.253449		CTSV	-1049		SMAD9	0.015306		TOB1	0.00625364
CASC5	6		GPS2	0.00225847		ASF1A	0.253449		FHOD1	-1051		PPP1R8	0.0152768		L3MBTL1	0.00622839
GSN	6		TXNDC11	0.00224965		RGS2	0.253402		KCNAB1	-1053		VPS37C	0.0152078		MSH6	0.00621001
ANXA2	6		ABLIM1	0.00224926		MIF	0.253355		SHMT2	-1055		EEF1D	0.0151932		TUBA1B	0.00619268
PID1	6		MUC1	0.00223519		PSMB9	0.253309		CD14	-1055		GRN	0.0151245		PDE6D	0.00618715
PARD6B	6		GAS7	0.00223277		FANCI	0.253309		DCTD	-1057		CTNNBIP1	0.0150756		CASP8AP2	0.00618033
LTA	6		ASL	0.00221857		CD40	0.253262		TCEB1	-1058		CEP55	0.0149702		ASL	0.0061434
IGSF21	6		HNRNPL	0.00220922		CHN2	0.253262		PSME1	-1059		RABEP1	0.0149183		IL6ST	0.00612083
CENPE	6		NCOA3	0.00217293		F13A1	0.253262		TFPT	-1059		STX17	0.0149172		NCF2	0.00610219
TGFBR1	6		RAB5A	0.00214014		MED17	0.253216		MYB	-1060		PRRC2A	0.0149169		HOMER3	0.00607972
L3MBTL1	6		AIP	0.00211363		CXCL1	0.253216		USF2	-1060		MBIP	0.0149064		TECR	0.00607845
BCL3	6		OSTC	0.00209473		USP32	0.253123		KCTD12	-1061		MOB1B	0.014906		PPIA	0.00607639
GAS7	6		RAB31	0.00207816		KCNAB1	0.253123		HSBP1	-1061		PTPRO	0.0148858		APOD	0.00605685
SPRED1	6		TUBB6	0.00206225		NUDT3	0.253076		SOX5	-1062		CENPJ	0.0147999		PTX3	0.00602034
RCC2	6		TUBG1	0.00200735		DDX54	0.253076		IRS2	-1062		NUPR1	0.0146722		SEPT9	0.00600802
AXL	6		LPCAT2	0.0019963		PFDN1	0.25303		GMNN	-1063		CCNA2	0.0145065		DST	0.00598372
FAM46A	6		FGR	0.00199606		FHL3	0.252983		PELI2	-1063		NCF2	0.0144861		TCAP	0.00596845
CCNB1	6		TUBA1B	0.00199425		GATA2	0.252983		BCL6	-1064		ENG	0.0144126		IRS2	0.0059664
PA2G4	6		PELI2	0.00198951		FHOD1	0.252983		PFDN1	-1064		APC2	0.0143059		ULK1	0.00591137
ATR	6		DCTD	0.00197549		TEX10	0.252937		UCHL5	-1065		LMO2	0.0142474		ADAM22	0.00588562
DVL1	6		SPP1	0.00197046		RPAP3	0.252751		LAD1	-1065		NCOR2	0.0142351		GOLM1	0.00583247
ABLIM1	6		SELENBP1	0.00194985		PNRC2	0.252751		IL1R1	-1067		ARHGEF12	0.0142121		IGF2BP3	0.00583042
RCC1	6		LMNA	0.00193836		CCNA2	0.252705		STK38	-1067		MPHOSPH9	0.0141738		BCAS3	0.00582179
C19orf57	6		CXCL12	0.0019198		MCRS1	0.252659		CDR2	-1067		TSGA10	0.0141092		PELI2	0.00582086
DUSP23	6		NCF2	0.00191456		CENPJ	0.252612		PCGF2	-1069		LAD1	0.014086		ALOX5	0.00581293
GPS2	6		C19orf57	0.00189818		CD79A	0.252612		HOMER3	-1069		EPS8	0.0139911		SEC61B	0.00580576
LGALS9	6		PRKAR2B	0.00189247		GSTO1	0.252612		QKI	-1070		CEBPA	0.013928		CLK3	0.00580494
GIPC1	5		LST1	0.00187276		STON2	0.252612		CDA	-1071		CEP70	0.0139092		WWP2	0.00579581
CLNS1A	5		CENPJ	0.00186782		STOM	0.252612		HOXB9	-1071		OSBPL10	0.013897		GIPC1	0.0057872
CENPJ	5		FRAT1	0.00186691		FERMT3	0.252612		CELF3	-1072		C8orf33	0.0138803		PRDX1	0.00578409
TOP2A	5		STAMBPL1	0.00185656		COPE	0.252612		CASC5	-1073		BCL2	0.0138319		RPAP3	0.00577667
SH3BP2	5		IL3RA	0.00183972		BMP2K	0.252612		FCGR2B	-1079		RAB11A	0.0136942		MAPRE3	0.00575439
WWP2	5		TAL1	0.00182466		LRP1	0.252289		ITGA4	-1079		ORC2	0.0136192		ANXA5	0.00571865
TXNDC11	5		NSMCE4A	0.00182283		PIGR	0.252289		CLNS1A	-1080		CENPF	0.0135872		TGFBR1	0.00570965
SORT1	5		MAFG	0.00181783		MPHOSPH9	0.252289		ADAMTS10	-1080		CCND3	0.013465		NUDT3	0.0056732
STK38	5		ENO3	0.00181174		CASC5	0.252242		ROPN1	-1081		JAM2	0.0134358		DVL1	0.0056624
TESC	5		APOE	0.00180682		TSGA10	0.252104		CSAD	-1082		MRPS7	0.0134358		NUF2	0.005615
DOCK2	5		SNX9	0.00179838		ARHGAP21	0.252058		PTPRO	-1082		MRPS5	0.0134358		PDIA6	0.00560594
FOSL2	5		PTPRO	0.00179389		CREB3	0.251781		CXCL8	-1083		SPECC1L	0.0134358		MS4A1	0.00558382
FXR1	5		DVL1	0.00178754		ATP1B1	0.251644		SMO	-1084		MRPL48	0.0134358		SNCA	0.00556911
USF2	5		PTBP1	0.0017835		WRAP73	0.251552		CPNE6	-1084		IL1B	0.013386		SOX5	0.00556216
DOCK8	5		PLK4	0.00177426		BUB1	0.251506		MPP1	-1085		GIPC1	0.0133331		SMC4	0.00553927
RRAGB	5		SCMH1	0.0017733		RAB11A	0.251506		TLR4	-1086		TBL1X	0.0132932		NEK2	0.00553102
LRSAM1	5		CDC45	0.00175534		GALK1	0.251506		IGSF21	-1086		RPAP3	0.0131876		BLM	0.0055183
SSR4	5		NCKIPSD	0.00173418		C1QA	0.251276		H1F0	-1086		TEK	0.0131703		MBIP	0.00551256
ORC2	5		RAI1	0.00173218		HLX	0.251276		GSK3A	-1086		CSAD	0.0131636		ARHGEF11	0.00549792
PLK4	5		WSB2	0.00172648		DAPK1	0.251185		ITSN1	-1087		COPRS	0.0130485		DCTD	0.00549264
SDC1	5		TOPORS	0.001725		HNF4A	0.251139		APPBP2	-1087		LRP1	0.0130484		MIF	0.0054878
SOX5	5		PDLIM7	0.00171483		PRKACA	0.250865		PAX8	-1088		PSME1	0.0130389		TUBB6	0.00548654
ASL	5		LSM7	0.00171303		ITSN1	0.250819		ITGB3	-1089		OTUB1	0.0129502		RHOJ	0.00545492
KMT2A	5		GPRC5C	0.00171035		TCAP	0.250773		CAMSAP2	-1089		F13A1	0.0126918		MKI67	0.00545478
RBFOX1	5		ST14	0.00170879		TEK	0.250773		NOLC1	-1089		NUDT3	0.0126655		SSR4	0.00543605
HSBP1	5		ANGPTL4	0.00170101		ADAMTSL4	0.250545		BLM	-1089		RASAL2	0.0126312		PA2G4	0.00539217
NSMCE4A	5		ASF1A	0.00167967		BNIP3L	0.250363		TBL1X	-1091		SHMT2	0.01257		FGR	0.00538847
EAF2	5		CYBB	0.00167787		RICTOR	0.250318		ASL	-1093		LTBR	0.0125398		IFIT2	0.00536797
EGR1	5		HNF4A	0.00167116		CLINT1	0.250318		ENO3	-1093		WWP2	0.0124883		RBFOX1	0.00536663
VEGFA	5		TBL1X	0.00166803		GNB4	0.250272		CLK3	-1093		UBE2E2	0.0124591		RRAS2	0.00534562
PELI2	5		MEST	0.00166478		PLA2G7	0.250272		C1QA	-1094		C19orf57	0.0124128		SHMT2	0.00533419
LRP1	5		FBLN1	0.00165743		ATAD3C	0.250272		NAA10	-1094		ITSN1	0.0123767		ATR	0.00532944
IL1B	5		HDAC10	0.00165468		LANCL1	0.250272		TAL1	-1094		CCNY	0.0123069		URI1	0.00531586
IRS2	5		E2F2	0.00165363		RAI1	0.250227		ATP1B1	-1094		PFKFB2	0.0123069		SNX9	0.00531369
PRKAR2B	5		RPP14	0.00163481		ASAH1	0.25		SUMO2	-1095		CTSL	0.0122664		CASP9	0.00531258
TBL1X	5		TCAP	0.00163071		BCAS3	0.249864		NASP	-1095		RICTOR	0.0122008		DAB2	0.00529105
HP	5		CDR2	0.00162025		GAS7	0.249683		RABEP1	-1096		DPYSL2	0.0121385		RCC2	0.00527763
MPP3	5		SH3BP4	0.00161502		USF2	0.249683		CTBP2	-1099		PHC3	0.0121237		SPRED1	0.00525252
RPS5	5		H1F0	0.00161406		ZFP64	0.249412		HLX	-1102		DZIP3	0.0120833		APOE	0.00523593
FGR	5		KCNIP3	0.0016105		MITF	0.249367		RAB5A	-1105		KIF2A	0.0120546		C19orf57	0.00519951
SNX9	5		RHOB	0.00160078		CKS1B	0.249276		KHDRBS3	-1105		DAPK1	0.01202		CASC5	0.00517346
CCR1	5		CBFA2T3	0.00159881		NUPR1	0.249276		RTCB	-1105		WSB2	0.0119521		TUBA1C	0.00515255
FRAT1	5		TYROBP	0.00158615		FRAT1	0.249231		SIGLEC5	-1108		JUNB	0.0119		SELENBP1	0.00513862
SMARCC1	5		TIFA	0.00158281		CTNNBIP1	0.249186		APOD	-1108		PIGR	0.0118678		TUBG1	0.00513775
CTSL	5		CASP9	0.00157178		ZWINT	0.249051		ORC2	-1109		MITF	0.0118421		IGF2BP1	0.0051328
TLR1	5		MEF2C	0.00156952		WBP11	0.249006		FAM46A	-1109		FANCI	0.0117885		CENPJ	0.00512145
SNX7	5		CELSR3	0.001569		WWP2	0.248781		IL3RA	-1110		OSTC	0.0117447		PIGR	0.00511983
NOLC1	5		BICD1	0.00156536		IL1R1	0.248736		ERLEC1	-1111		FTH1	0.0116738		RCC1	0.00509096
SPAG5	5		CDK2AP1	0.00156026		RBM26	0.248736		SDC1	-1112		FGR	0.0116679		TOPORS	0.00509032
TOB1	5		IRAK4	0.00155257		TEX11	0.248692		GOLM1	-1114		CTSV	0.0115367		SIGLEC5	0.00506795
PSMB3	5		VCAN	0.00153743		MAFG	0.248423		LRSAM1	-1117		VANGL1	0.0115094		CFB	0.00505846
DGKE	5		HSD17B14	0.00152809		PAXIP1	0.248423		BCL3	-1117		MAD2L1	0.0114284		OTUB1	0.00503665
MIF	5		DERL1	0.00152322		RASAL2	0.248423		ASAH1	-1121		DYNLT3	0.0113933		RAI1	0.00503285
SH3BP4	5		TESC	0.00151675		RABGAP1L	0.248333		PBLD	-1122		CASC5	0.0113821		CCR10	0.00503165
CYBB	5		USF2	0.00151592		SPRY2	0.247842		PSMB3	-1124		ADAMTS10	0.0112638		ITGAX	0.00497431
FHIT	5		MOB1B	0.00151518		SHMT2	0.247842		ABI3	-1124		CPSF2	0.0112407		LRCH3	0.00493868
PDLIM7	5		GNAQ	0.00151083		GMNN	0.247797		ATG16L2	-1126		PINK1	0.011221		CORO1C	0.00492435
RAB5A	5		FBXO5	0.00150973		LIG3	0.247753		DOK1	-1126		CPNE6	0.0112064		CELSR3	0.00491116
ACVR1B	5		SOX5	0.00150926		LBP	0.247352		TNK2	-1128		CARD9	0.0111835		DOCK8	0.0048893
RXRA	5		EPAS1	0.00150664		CELF3	0.247352		RCC1	-1129		MAP3K8	0.0111558		VCAN	0.00488748
USP14	5		CORO1C	0.00150599		NOC2L	0.247264		DLEU1	-1130		RTN4	0.0111425		JDP2	0.00487096
SUFU	5		NUPR1	0.00150548		STK38	0.247219		PRAM1	-1130		GTF3C3	0.0111422		STAMBPL1	0.00485161
HNF4A	5		RAB11B	0.00150281		SNCA	0.246998		RHOJ	-1130		TRRAP	0.0111422		DGKE	0.00484857
BCAS3	5		KMT2A	0.00150123		ADAMTS10	0.246998		IRAK3	-1131		ZNF687	0.0111422		SEC24A	0.00484162
HOMER3	5		TRIB1	0.00150063		CASP9	0.246998		IL1B	-1132		NPM3	0.0111422		RPP14	0.00483965
TUBG1	5		ATR	0.00149543		CSAD	0.246909		TRAF3IP2	-1134		INTS3	0.0111422		ROPN1	0.00480024
SAMD4A	5		PPP1R7	0.00146879		WSB2	0.246821		PID1	-1134		HJURP	0.011046		ITGB5	0.00479017
RABGAP1L	5		PECAM1	0.00145559		CPNE6	0.246821		BRK1	-1134		ZWINT	0.0110139		RHOB	0.00478353
TCAP	5		USP14	0.00145138		CCNY	0.246821		BGN	-1135		HNF4A	0.0109867		RRAGB	0.00468377
ARHGAP32	5		ZBTB22	0.00145138		PFKFB2	0.246821		IRAK4	-1136		RASSF4	0.0109467		ARL4D	0.00467908
DPYSL2	5		PSMB9	0.00145138		CTSV	0.246777		CATSPER1	-1136		RAI1	0.0109319		PLK4	0.00467483
SEC24A	5		VSIG4	0.00145138		TLR1	0.246732		HCK	-1136		HAUS1	0.0109192		ETV5	0.00465146
DAB2	5		IRF5	0.00145138		JAK1	0.246644		DOCK5	-1136		ASAH1	0.0108944		MEST	0.00458904
PDIA6	5		DTNA	0.00145138		CTSL	0.246644		ZNF331	-1136		CELF3	0.0108663		FXR1	0.00457984
MED6	5		CTTNBP2	0.00145138		PLEKHJ1	0.246556		MYO10	-1137		BCL3	0.0108443		ZBP1	0.00457979
PDGFB	5		UBL4A	0.00145138		CYBB	0.246468		BLK	-1137		PLEKHJ1	0.0108327		LMNA	0.00457669
NCKIPSD	5		SETD7	0.00145138		MAPRE3	0.246468		TECR	-1138		ATG16L2	0.0108313		TXN2	0.00452626
MSH6	5		TNPO2	0.00145138		TBC1D7	0.246468		MAP3K8	-1140		TXNDC11	0.010784		CBLB	0.00451898
APOE	5		TNS4	0.00145138		NRARP	0.246468		TNFRSF21	-1140		KCTD12	0.010778		ITGA4	0.00447545
TEK	5		MITF	0.00145138		CUEDC1	0.246468		LIG3	-1140		IPO9	0.0107777		CD33	0.00446662
STAMBPL1	5		TLR7	0.00145138		ADAP2	0.246468		JDP2	-1141		TBC1D7	0.0107777		ACVR1B	0.00445587
CXCL8	5		METTL18	0.00145138		IPO9	0.246468		ARHGEF11	-1142		NRARP	0.0107777		DPYSL2	0.00445311
MASP1	4		PCYT2	0.00145138		IDH3A	0.246468		HSD17B14	-1142		CUEDC1	0.0107777		PSMB3	0.00444515
CFB	4		ERO1LB	0.00145138		GOLGA3	0.246468		TIFA	-1143		IDH3A	0.0107777		VEGFA	0.00443513
CELSR3	4		HERPUD1	0.00145138		TRIOBP	0.246468		EIF4G1	-1143		ADAP2	0.0107777		CCL8	0.00441604
ARL4D	4		IL34	0.00145138		GUCY1A3	0.246468		CEBPA	-1144		GOLGA3	0.0107777		ANXA2	0.00441586
SIGLEC5	4		URM1	0.00145138		XPO7	0.246468		KIF2A	-1144		TRIOBP	0.0107777		ENO3	0.00440741
RHOB	4		PHRF1	0.00145138		CARD10	0.246468		WBP11	-1144		GUCY1A3	0.0107777		RAD21	0.00438856
NEK2	4		TNFRSF10B	0.00145138		AVPI1	0.246468		DOCK2	-1146		XPO7	0.0107777		TLR1	0.00438478
ARHGEF11	4		PSENEN	0.00145138		SFXN1	0.246468		LPCAT2	-1146		CARD10	0.0107777		KCNIP3	0.00437721
DSN1	4		IER3	0.00145138		ZFR	0.246379		DSTYK	-1147		AVPI1	0.0107777		CXCL12	0.00436336
ATRX	4		FRA10AC1	0.00145138		BUB1B	0.246335		CD33	-1147		SFXN1	0.0107777		TTF2	0.00436087
TOPORS	4		RNF126	0.00145138		GATAD2B	0.246291		NUAK1	-1148		IGSF21	0.0106655		GLI3	0.00434781
ARHGAP21	4		RAB3D	0.00145138		CENPE	0.246115		MOB1B	-1148		CCNB1	0.01062		FBXO32	0.00434781
ADAM22	4		UBE2C	0.00145138		IGSF21	0.246071		MRPS31	-1149		RHEB	0.0106078		ARHGDIB	0.0043417
MEST	4		ADAM8	0.00145138		BLM	0.246028		SYNE2	-1149		GNAQ	0.0106001		SCMH1	0.0043271
PAXIP1	4		TCEAL1	0.00145138		NAA10	0.24594		RBPJ	-1150		MORF4L2	0.0104895		GPRC5C	0.00430646
ARHGDIB	4		PLEKHJ1	0.00145138		EFEMP2	0.245896		RBM26	-1150		ARHGDIB	0.0104675		CYFIP1	0.00429924
CD19	4		NEO1	0.00145138		INTS6	0.245852		NOC2L	-1151		POM121	0.0103774		RAB31	0.00429619
NAA10	4		GADD45B	0.00145138		PPP1R9A	0.245808		PSAP	-1151		DMD	0.0103644		FANCI	0.00429032
LRCH3	4		SOCS6	0.00145138		BRK1	0.245764		RBFOX1	-1153		PCGF2	0.0103456		DFFA	0.00428453
DST	4		SLC35F6	0.00145138		TCEB1	0.245677		MVP	-1153		EXOC4	0.0103398		PHC3	0.00426563
ZBTB22	4		NAMPT	0.00145138		ENO3	0.245545		SMARCC1	-1153		STK38L	0.0103134		BCL3	0.00426143
UBE2J1	4		RIOK2	0.00145138		SMO	0.245458		AP1B1	-1153		ZNF587	0.0102826		ASAP1	0.004255
AIP	4		NCAPH	0.00145138		LGMN	0.245458		SPP1	-1154		SMAD1	0.0102653		FOSL2	0.00423954
NOC2L	4		PSD	0.00145138		DOCK2	0.245239		TTF2	-1155		PLSCR1	0.0102627		ATP5I	0.00423834
ZBP1	4		MBD4	0.00145138		WAS	0.245152		ABCA1	-1156		UCHL5	0.0100397		NOC2L	0.00423219
GMNN	4		PEA15	0.00145138		PCGF2	0.245109		DMD	-1156		MCRS1	0.0100169		ZFP64	0.00421197
RASSF4	4		ITGAM	0.00145138		AKAP9	0.245065		ARHGEF5	-1156		SGTA	0.00998526		RABEP1	0.00420697
DSTYK	4		IL2RG	0.00145138		CCDC8	0.245021		PCED1A	-1156		KIAA1109	0.00979679		CD19	0.00420693
DERL1	4		CCL4	0.00145138		MYO10	0.244978		WWP2	-1157		MLLT10	0.00979679		KIF13B	0.00420201
WEE1	4		DAB2	0.00143729		GPS2	0.244891		MAFG	-1157		FERMT2	0.00979679		TESC	0.00420185
OLA1	4		SLC3A2	0.00141498		PLA2G4A	0.244804		EXOC4	-1157		TERT	0.00979679		MED6	0.00418482
ANXA5	4		SSR4	0.0014066		ORC2	0.244673		CTAGE5	-1158		RAC2	0.00975576		SORT1	0.00417975
SPP1	4		MSH6	0.00140548		BCL6	0.24463		TGFBR1	-1158		TLR1	0.0097505		EID3	0.0041792
EID3	4		CBS	0.0013989		GLTSCR2	0.244586		ZFR	-1159		ENO3	0.00969048		ARHGAP32	0.00414512
ZC3H18	4		KLF11	0.00137979		AXL	0.244543		OLA1	-1160		GMNN	0.00962045		ECH1	0.00413628
HEYL	4		SPRED1	0.00137025		PSME1	0.2445		SEC61A1	-1160		USP32	0.00959306		RAB11A	0.0041115
CASP8AP2	4		CASC5	0.00136674		RYR1	0.2445		BATF2	-1160		PSMD7	0.00958907		SEZ6L2	0.00411143
CTSV	4		ANXA5	0.0013595		UCHL5	0.244456		IGKC	-1161		CREB5	0.00956877		SEC61A1	0.00408118
IL1R2	4		RCC2	0.00135815		ATG16L2	0.244283		LZTFL1	-1161		DUSP6	0.00953623		CENPE	0.00405002
KCNIP3	4		BCAS3	0.00133844		MLLT10	0.244283		TONSL	-1163		CASP9	0.00953078		SNX7	0.00404998
ENO3	4		PHC3	0.00133303		FERMT2	0.244283		RAD21	-1164		CTSB	0.00939895		STK38	0.00404354
PIGR	4		SDC1	0.00132945		KIAA1109	0.244283		CCNB1	-1164		NOL4L	0.00937114		RAB11B	0.00403282
OSTC	4		ANXA2	0.00132871		TERT	0.244283		CTSL	-1165		MAFG	0.00934512		ADAMTS10	0.00402876
ITGA4	4		MBIP	0.0013146		PAX8	0.24424		EIF4B	-1165		EMILIN1	0.00932559		EVI5	0.00399256
GP6	4		CCNA2	0.00129316		TNFRSF10C	0.244153		ADRB1	-1165		INTS6	0.00928711		FAM3A	0.00397692
NUPR1	4		SMC5	0.00128369		DUSP6	0.244067		PFKFB3	-1165		CPNE8	0.00925143		FHIT	0.00395957
JDP2	4		GOLM1	0.00123967		STAMBPL1	0.244023		MIF	-1165		PTAFR	0.00925143		CEBPD	0.0039565
HOXB9	4		PA2G4	0.00123842		HSBP1	0.24398		UBE2J1	-1166		RYR1	0.00923369		NCKIPSD	0.00395539
RPAP3	4		IGSF21	0.00121604		CNST	0.243937		DSN1	-1167		NSMCE4A	0.00917236		ORC2	0.00394795
EPB41L2	4		STX17	0.00120104		ROPN1	0.243894		DAB2	-1167		BLM	0.00917208		CBS	0.00393911
OTUB1	4		CDK5	0.00119596		DSC2	0.243851		LGALS9	-1167		TNFRSF10C	0.00915136		GP6	0.00393173
TRIB1	4		RASSF2	0.00118973		WBP2	0.243851		PDGFB	-1168		PARD6B	0.00913		CACNA1I	0.00393158
SMC4	4		MIF	0.00117438		PLOD1	0.243851		VAV2	-1169		SNCA	0.00912207		MEOX1	0.00392492
EVI5	4		PARD6B	0.00116812		SERPINB13	0.243851		WNK2	-1170		TNFRSF10B	0.00909485		SH3BP4	0.00391774
MYOG	4		TUBA1C	0.00116601		FAM91A1	0.243851		MED6	-1170		APMAP	0.00908827		LTA	0.00390852
PHC3	4		ENG	0.00115818		APOBEC3B	0.243851		ATRX	-1171		SETD3	0.00900129		ENG	0.00390531
SYT17	4		PSMD7	0.00114522		RPL10L	0.243851		LTBR	-1172		RBMS2	0.00900129		OSTC	0.00390168
NUDT3	4		TIMP2	0.00113362		NUPL2	0.243851		TEX10	-1174		SLC4A1AP	0.00900129		NSMCE4A	0.00387035
FANCI	4		ABI3	0.00112764		VANGL1	0.243764		DTNB	-1174		C9orf72	0.00900129		EGR1	0.00386875
ECH1	4		CHN2	0.00112754		KHDRBS3	0.243506		SMCHD1	-1174		HBS1L	0.00900129		EPAS1	0.00386317
SSX3	4		GAB2	0.00112362		CDA	0.243377		SMC4	-1175		YPEL3	0.00900129		SYNE2	0.00385196
CORO1C	4		SEL1L	0.00110755		CCNB1	0.243334		SH3BP4	-1177		SPATS2	0.00900129		TIFA	0.00384449
CTNNBIP1	4		CYFIP1	0.00110715		KCTD12	0.243205		ARL4D	-1178		AURKC	0.00900129		SLC3A2	0.00383694
RPP14	4		RAB11A	0.00110567		HJURP	0.243205		CD9	-1178		CDC42EP4	0.00900129		MAP3K11	0.00382435
APC2	4		IGF2BP1	0.00110285		STRBP	0.243162		ID2	-1178		ODF3L2	0.00900129		LST1	0.00381938
DEPTOR	4		BCL3	0.0010805		SUMO2	0.243119		KLF11	-1180		ATRX	0.0089777		PTGS2	0.00381203
KIAA1598	4		CCL8	0.00107227		PTPN22	0.243076		HJURP	-1180		ADAMTSL4	0.00897584		CCNB1	0.00381006
LZTFL1	4		LAMC3	0.00107138		CTBP2	0.243034		GNB5	-1180		CLEC7A	0.00895705		KLF11	0.00380509
PPP1R7	4		DPYSL2	0.00106452		CEBPA	0.242948		SETD1A	-1181		BLK	0.00887925		WEE1	0.00379343
FBXO5	4		TGFBR1	0.00106317		CD14	0.242691		LAMC3	-1181		PAX8	0.00886338		LPCAT2	0.00378186
E2F2	4		OTUB1	0.00104182		GNB5	0.242648		FEN1	-1181		GAS7	0.00885242		SMC5	0.00377674
GNB5	4		KIAA1598	0.00102857		ARHGEF5	0.242648		C3	-1182		CD40	0.00875185		SMARCC1	0.00374765
RAD21	4		DOCK1	0.00102337		DMD	0.242137		FAM3A	-1184		JAK1	0.0087369		USF2	0.00372717
CLINT1	4		ARL4D	0.0010065		NASP	0.242137		RAD17	-1184		GATA2	0.00869762		DSN1	0.00370896
GOLM1	4		SMO	0.00100478		CCNB2	0.242094		ENG	-1185		CCNB2	0.00861659		CBFA2T3	0.00370122
CBFA2T3	4		ITGA4	0.00099999		ARHGEF11	0.242009		LRR1	-1187		CHN2	0.00853945		ZC3H18	0.00369301
GNAQ	4		HOMER3	0.00098823		HOXB9	0.242009		TRIM8	-1187		PAXIP1	0.00852387		USP32	0.00369077
PBLD	4		RABEP1	0.00098492		NOL4L	0.241924		ATAD2	-1187		CREB3	0.00847027		MPP1	0.00366977
FBXL12	4		CACNA1I	0.00096928		ZNF185	0.241924		C19orf57	-1187		SEC61A1	0.00845961		LSM7	0.00366912
URI1	4		STK38	0.00096041		GFPT1	0.241924		MS4A1	-1188		BUB1B	0.00841686		E2F2	0.00366561
CD33	4		PPIE	0.0009572		MARVELD2	0.241924		FUBP3	-1189		HEYL	0.00836836		PRKAR2B	0.00366316
GAB2	4		CEBPD	0.00095006		TTC7A	0.241924		EPN1	-1190		PRKACA	0.00836461		GPX7	0.00364981
ASF1A	4		TTF2	0.00094286		STT3B	0.241924		CORO1C	-1190		ZFP64	0.00833697		DOCK2	0.00363112
ITGB5	4		PDE6D	0.0009383		KIF2A	0.241754		THRB	-1190		CKS1B	0.0082786		ST14	0.00363091
PSMB9	4		DGKE	0.00093445		EIF4B	0.241754		GPX7	-1192		AKAP9	0.0082695		CHN2	0.00363006
TONSL	4		L3MBTL1	0.00093286		ADRB1	0.241754		RPP14	-1192		MYO10	0.00813841		EAF2	0.00362109
TRIM33	4		TNFRSF10C	0.00092922		PFKFB3	0.241754		ITGB5	-1192		SDC1	0.0081378		PAXIP1	0.00361896
ATAD2	4		NOL4L	0.000915		MOB1B	0.241585		PRKAR2B	-1193		CDK2AP1	0.00812651		PINK1	0.00361316
FHOD1	4		ARL2	0.00089991		DCTD	0.241543		CCNB2	-1193		GLTSCR2	0.00810376		HOXB9	0.00361248
SELENBP1	4		MEX3C	0.00088468		PHC3	0.241543		ACVR1B	-1194		MAPRE3	0.00809553		MAFG	0.00360282
MPP1	4		PSMB3	0.00087973		SLC38A1	0.241416		OXSR1	-1195		NFKBIL1	0.00807631		PARD6B	0.00357979
HOMER1	4		PSME1	0.00087725		BCL3	0.241416		CNTFR	-1196		GATAD2B	0.00804919		FCN1	0.00357141
CYFIP1	4		ANKRD27	0.00087057		GOLM1	0.241373		RBM28	-1197		IL1R1	0.00803834		RABGAP1L	0.00357104
CBLB	4		WIPI2	0.00086653		MYB	0.241289		EPB41L2	-1197		ARHGEF5	0.00795385		SPAG5	0.00356224
ATP1B1	4		ADAM22	0.0008554		HOMER3	0.241078		RPL38	-1199		MON2	0.00791668		NUPR1	0.00354604
RAB7A	4		ARHGEF11	0.00085033		OCRL	0.240951		PLAUR	-1199		RGS2	0.00791193		CLNS1A	0.00353449
RAI1	4		SAMD4A	0.00084742		EMILIN1	0.240909		TRIB1	-1199		REPS2	0.00787275		ZNF331	0.00352734
LMNA	4		DOCK2	0.00084711		ASL	0.240783		ADAM22	-1200		CYBB	0.0078512		ABHD16A	0.00352463
VSIG4	3		CD33	0.00084687		NUAK1	0.240783		DST	-1200		HRK	0.00781492		HMOX1	0.00351314
ITGAX	3		ARHGDIB	0.00084507		NSMCE4A	0.240279		WSB2	-1201		IL2RG	0.00779733		HDAC10	0.0035082
PTGS2	3		YTHDF2	0.00084162		IGKC	0.240237		CBLB	-1201		CD9	0.00779101		CEBPE	0.00349116
OXSR1	3		GPX7	0.0008393		ENG	0.240195		PDE6D	-1202		FHL3	0.00776879		IL3RA	0.00348833
LRR1	3		RHOJ	0.00082439		APC2	0.240153		EIF2AK3	-1203		TTF2	0.00775881		SEL1L	0.00347226
C1QB	3		CD19	0.00080193		MAP3K8	0.240112		NUF2	-1203		ARHGAP18	0.00775776		KIF2A	0.00347181
JARID2	3		LYZ	0.00080173		ERLEC1	0.24007		FOSL2	-1204		DUSP9	0.00775776		CNTFR	0.00345822
ECT2	3		TSGA10	0.00079007		MAN1A2	0.239986		PDE9A	-1205		COA1	0.00775776		PID1	0.00344089
ATP5I	3		FOXO4	0.0007856		FCGR2B	0.239944		KIAA0930	-1206		IGLC1	0.00775776		RPS5	0.00344072
PPP1R9A	3		RBM26	0.00078193		RAB5A	0.239903		RALGPS2	-1206		IGJ	0.00775776		FBXO11	0.00341931
TYROBP	3		ECH1	0.0007749		DYNLT3	0.239903		SHCBP1	-1206		ARF4	0.00775776		KMT2A	0.00340975
KIAA0930	3		CBLB	0.00077352		APMAP	0.239694		FABP3	-1206		DSTYK	0.00774793		ASF1A	0.00340405
RNF144B	3		GALK1	0.00077013		CDK2AP1	0.239444		SLC38A1	-1208		PLK4	0.00773351		ATP1B1	0.00340361
MAFG	3		USP32	0.00076977		TAL1	0.239402		APOE	-1208		SLC38A1	0.00762082		DSTYK	0.0034005
EPN1	3		GIPC1	0.00075768		TRAF3IP2	0.239361		CENPE	-1209		TCEB1	0.00761471		CTSV	0.00339926
LYZ	3		CNTFR	0.0007538		PPP1R26	0.239361		SUV420H2	-1209		ZNF185	0.00759958		TYROBP	0.00339632
KIF2A	3		STX7	0.00075235		PID1	0.239361		CASP8AP2	-1210		GFPT1	0.00759958		STX7	0.00336439
CACNA1I	3		ZNF516	0.00075025		CPSF2	0.239278		CASK	-1212		MARVELD2	0.00759958		ANKRD27	0.00334846
FBXO11	3		PPP1R26	0.0007425		MAZ	0.239195		FBXO11	-1213		TTC7A	0.00759958		FBXO5	0.00333308
KCTD12	3		CLNS1A	0.00074235		REPS2	0.239195		MAN1A2	-1213		STT3B	0.00759958		NASP	0.00328891
IL3RA	3		MCM4	0.00073956		LTBR	0.239195		PARP11	-1214		TCAP	0.00758911		BATF2	0.00328192
FCGR2B	3		CASP8AP2	0.00073424		OSTC	0.23907		PPP1R7	-1215		WBP11	0.00757593		APC2	0.00325995
IRF5	3		FXR1	0.00073288		GNAQ	0.23907		PPP1R9A	-1216		ITGB5	0.00756502		BLK	0.00324748
MS4A1	3		RABGAP1L	0.00072988		PHRF1	0.239029		PBK	-1217		CENPE	0.00756153		BICD1	0.00323185
GTF3C1	3		PIGR	0.00072599		ZBTB38	0.238946		OSBPL10	-1217		TLR4	0.00754288		NAA10	0.00323019
CELF3	3		DYNLT3	0.00072466		SPOCD1	0.238946		FGR	-1218		TCERG1	0.00753261		WSB2	0.00322211
STK38L	3		DST	0.00072275		FARP1	0.238946		CD55	-1219		KHDRBS3	0.00753036		ARHGAP21	0.00322065
ATP6V1D	3		CENPE	0.00071711		CHCHD6	0.238946		PTGS2	-1220		TEX11	0.00750869		TIMP2	0.00320812
LAMTOR2	3		CAMSAP2	0.0007167		KCTD20	0.238946		ATF3	-1220		CD14	0.00747575		ZEB2	0.00320242
ARL2	3		SEC61A1	0.00070132		MIIP	0.238946		CRADD	-1221		WAS	0.00745311		FBLN1	0.00318316
CBS	3		FAM3A	0.00069539		PDGFRB	0.238904		HRK	-1222		BRK1	0.00739639		GAB2	0.0031703
PRAM1	3		MED6	0.00069236		SETD3	0.238904		HNF4A	-1223		C1QA	0.00737501		MEF2C	0.00316855
RALGPS2	3		ALOX5	0.00068342		RBMS2	0.238904		FBLN1	-1224		CCDC8	0.00734613		SMO	0.00315492
RRAS2	3		HGF	0.0006702		SLC4A1AP	0.238904		SLC3A2	-1225		FHOD1	0.00734392		CDK2AP1	0.00315135
SHMT2	3		PAXIP1	0.00066061		C9orf72	0.238904		ATF7IP	-1226		RABGAP1L	0.0073196		HSD17B14	0.00314753
TEX10	3		EGR1	0.00065652		HBS1L	0.238904		SNX7	-1226		TNFRSF21	0.00731881		CLINT1	0.00312282
MRTO4	3		PRDX1	0.0006545		YPEL3	0.238904		MON2	-1226		JDP2	0.00731094		YTHDF2	0.00311306
RBM28	3		MAPRE3	0.00065318		SPATS2	0.238904		HDAC10	-1226		VAV2	0.0073102		HNF4A	0.00310843
STRBP	3		APMAP	0.00065205		AURKC	0.238904		ZEB2	-1227		BCAS3	0.00729702		ATF3	0.00308889
EPAS1	3		SEZ6L2	0.00064866		CDC42EP4	0.238904		OGT	-1227		PPIE	0.00726435		WIPI2	0.00308547
CAMSAP2	3		ZFP64	0.00064835		ODF3L2	0.238904		SERPING1	-1227		SPRY2	0.00726433		FCGR2B	0.00308016
RASAL2	3		FANCI	0.00064803		PINK1	0.238863		GNAQ	-1229		GPS2	0.00722716		TNFRSF10C	0.00307553
PPIE	3		RBM28	0.00064577		HRK	0.238697		HP	-1230		CCDC9	0.00718845		CTAGE5	0.00304933
SMO	3		ROPN1	0.0006366		TNFRSF21	0.238656		EPHB6	-1231		CWC15	0.00718845		EPB41L2	0.00304843
FBXO32	3		RCC1	0.00063177		VAV2	0.238491		HMOX1	-1231		FAM20C	0.00717864		TRIB1	0.00304147
CSAD	3		MRTO4	0.0006304		IL3RA	0.238285		TUBG1	-1231		IRAK3	0.00716512		LYZ	0.00303963
HID1	3		WEE1	0.00062956		BLK	0.238161		CLINT1	-1231		MAZ	0.00710821		NDNL2	0.00302485
INPPL1	3		ATP5I	0.00061643		SPP1	0.237997		MAZ	-1232		STAMBPL1	0.00702753		SMC6	0.00302485
SMC5	3		DFFA	0.0006156		EXOC4	0.237997		STRBP	-1233		PDGFRB	0.00696592		VAMP7	0.00301753
BEND7	3		PKP3	0.00060528		ITGB5	0.237955		DNAJB12	-1233		ERLEC1	0.00696452		SAMD4A	0.00300873
IL1RN	3		ZFP36	0.00059649		ARL4D	0.237873		CCDC8	-1234		SUMO2	0.0069564		PAWR	0.00299502
IL1A	3		ZNF331	0.0005957		ARHGEF12	0.23775		SEL1L	-1236		RBM26	0.006923		BRK1	0.00297006
KLF11	3		BATF2	0.00058889		SOX5	0.237668		STARD13	-1236		LBP	0.00691835		DERL1	0.0029647
LST1	3		ASAH1	0.00058413		GTF3C3	0.237627		GLCCI1	-1237		TOB1	0.00687697		CAMSAP2	0.00296148
NDRG2	3		EVI5	0.00057655		TRRAP	0.237627		REPS2	-1238		PLA2G4A	0.00682864		BGN	0.00294554
PINK1	3		DOK1	0.000571		ZNF687	0.237627		RPAP3	-1238		IGKC	0.00676491		KIAA1598	0.0029361
HSH2D	3		PRDX6	0.00057011		NPM3	0.237627		CFB	-1239		FOXO4	0.00673088		DNAJB12	0.0029356
EMILIN1	3		SNX7	0.00057003		INTS3	0.237627		TXN2	-1239		NUAK1	0.00664774		ZBTB22	0.00290919
SEC61A1	3		GLTSCR2	0.00056907		TFPT	0.237586		SCMH1	-1240		NASP	0.00662135		MYOG	0.0029017
NOL4L	3		SMARCC1	0.00056839		SDC1	0.237545		KIAA0226	-1241		PID1	0.00661244		APLP2	0.0029017
PKP3	3		BLM	0.00056556		CENPF	0.237545		SORT1	-1242		DLEU1	0.00655472		SUFU	0.0029017
DTNA	3		TLR1	0.000557		TONSL	0.237504		TCERG1	-1242		ATP5I	0.00654833		TSTA3	0.00290065
CTTNBP2	3		PTX3	0.00055544		TLR4	0.237463		DOCK8	-1243		ARL4D	0.00654101		WNT7B	0.00289967
SLC3A2	3		F13A1	0.00054276		CDR2	0.237341		BRAP	-1243		GOLM1	0.00653485		FEN1	0.00288293
PSMD7	3		SORT1	0.00053979		IRAK3	0.2373		SH3BP2	-1244		TNS4	0.00651949		STRBP	0.00286072
MYO10	3		ZEB2	0.00052892		SYNE2	0.2373		ARHGEF12	-1244		RND3	0.0064864		OSBPL10	0.00285455
LSM7	3		PPP1R9A	0.00052539		JAM2	0.237136		GLTSCR2	-1244		REEP4	0.0064864		MYO10	0.00285388
TECR	3		ATP6V1D	0.00052122		MRPS7	0.237136		ATP2A3	-1245		SHROOM1	0.0064864		FLI1	0.00285144
FAM3A	3		HOXB9	0.00051868		MRPS5	0.237136		OCRL	-1246		SPIRE1	0.0064864		F13A1	0.00284935
TTF2	3		CLINT1	0.00051797		SPECC1L	0.237136		RYR1	-1246		MAN1A2	0.00646327		H1F0	0.00284039
OAS2	3		HP	0.00051556		MRPL48	0.237136		KLK9	-1248		SEZ6L2	0.00646107		GNAQ	0.0028326
GPX7	3		IL18	0.00050819		CXCL8	0.236933		MASP1	-1248		TFPT	0.00644831		SVEP1	0.00283102
UBL4A	3		KIF2A	0.00050734		ATP5I	0.23681		SNX9	-1248		C7orf50	0.00643493		PSMD7	0.0028274
FUBP3	3		NOC2L	0.00050131		ZNF331	0.236607		CENPJ	-1249		BNIP3L	0.00638195		TRIM33	0.00281205
BGN	3		RPS5	0.00049837		RAD21	0.236607		FLI1	-1249		BCL6	0.00633501		RAB13	0.0028073
MRPS31	3		ARHGAP32	0.00049317		IRAK4	0.236445		CENPF	-1249		DOCK2	0.00629876		DOCK5	0.00280418
CEBPE	3		RAD21	0.00049305		JDP2	0.236404		UBE2L6	-1250		NFATC4	0.00627112		CD63	0.00280277
CEBPD	3		STAB1	0.00048715		DOCK1	0.235919		RRAS2	-1250		CDA	0.00624657		UBE2T	0.0027932
NTRK3	3		APC2	0.00047663		TTF2	0.235919		GP6	-1250		FRAT1	0.00622583		MRTO4	0.00278464
RAB11B	3		ARHGAP21	0.00047622		TGFBR1	0.235757		CXCL2	-1250		PPP1R9A	0.00616643		LRR1	0.00278004
SEZ6L2	3		MED17	0.00047541		FOXO4	0.235757		MKNK1	-1251		SMC5	0.00613229		RIN1	0.0027787
HRK	3		EPN1	0.00047105		SEC61A1	0.235636		FCGR2A	-1251		SYNE2	0.00609837		RBM28	0.00276752
RMI2	3		TEX10	0.00046693		NOXA1	0.235636		MRTO4	-1252		LPCAT2	0.00607314		TONSL	0.00276669
FEN1	3		FEN1	0.00045911		STK38L	0.235636		RHOB	-1253		GNB5	0.005988		ZNF516	0.00275602
BLK	3		MAN1A2	0.00045568		RAD17	0.235636		TNFRSF10C	-1253		CNST	0.00597699		PKP3	0.00275048
CENPF	3		LRR1	0.00045343		PLK4	0.235596		E2F2	-1253		KLHL5	0.00596122		CDA	0.00274636
ETV5	3		CFB	0.00045217		TIFA	0.235596		SSX3	-1254		MPPED1	0.00596122		ZFP36	0.00274439
EMP1	3		RASSF8	0.00044935		SH3RF3	0.235556		DUSP6	-1255		DALRD3	0.00596122		AP1B1	0.0027369
SMIM3	3		LGMN	0.00044924		ARHGAP33	0.235556		RAB11B	-1255		PROC	0.00596122		RAB7A	0.00273576
HGF	3		INPPL1	0.00044302		VWF	0.235556		TGFB2	-1255		RPL38	0.00590788		FAM219A	0.00271109
TIMP2	3		CD55	0.0004424		ARHGAP15	0.235556		LRP1	-1256		JUND	0.00589367		NSA2	0.00270848
ADAMTS10	3		TREM1	0.00043564		CTAGE5	0.235475		MPHOSPH9	-1256		PTPN22	0.00580986		RASSF8	0.00270585
SETD7	3		FHIT	0.00043547		LZTFL1	0.235354		TRIM33	-1258		HSBP1	0.00579598		IMPDH1	0.00269441
FBLN1	3		LIG3	0.00043476		TCERG1	0.235314		PPP2R4	-1258		PPP1R26	0.00577514		EPN1	0.0026928
KIAA0226	3		CEBPE	0.00043285		DLEU1	0.235314		TLR3	-1259		HOXB9	0.00576212		RNF144B	0.00269038
MRPL28	3		LTA	0.00043282		RASSF4	0.235234		CNST	-1259		DCTD	0.00567016		TREM1	0.0026856
PRR5L	3		DSN1	0.00043073		TNK2	0.235154		FAM219A	-1260		PHRF1	0.00563134		BRAP	0.00268201
PNRC2	3		GP6	0.00042382		APPBP2	0.234913		SIPA1L2	-1261		ZBTB38	0.00560276		GRIK5	0.0026628
APLP2	3		ERLEC1	0.00042321		VPS4A	0.234473		VANGL1	-1262		SPOCD1	0.00560276		CREM	0.00265821
ATF3	3		SYNE2	0.00042159		TIMM17A	0.234473		NFATC4	-1262		FARP1	0.00560276		NOTCH2	0.00265078
ASAP1	3		DOCK8	0.00041715		MVP	0.234394		MITF	-1262		CHCHD6	0.00560276		NDRG2	0.00264849
H1F0	3		PAWR	0.00040797		PRKAR2B	0.234314		ZBTB22	-1263		KCTD20	0.00560276		HTRA1	0.00264783
TNPO2	3		GSN	0.00040502		ATRX	0.234314		SPAG5	-1264		MIIP	0.00560276		NOL4L	0.00263251
MAP3K8	3		EAF2	0.00040331		JUND	0.234234		CD63	-1265		VPS4A	0.00556016		RBM26	0.0026236
FABP3	3		KIF13B	0.00039639		HSD17B14	0.233996		CTNNBIP1	-1266		TIMM17A	0.00556016		BASP1	0.00262187
GRIN2A	3		ITGB5	0.00039166		ATF7IP	0.233916		ANXA5	-1268		IRAK4	0.00552447		HSBP1	0.002607
YTHDF2	3		RAB7A	0.00039141		BGN	0.233916		EXOSC8	-1269		DST	0.00551368		WNK2	0.00260575
SCMH1	3		ITGAX	0.00039134		LPCAT2	0.233837		OAS2	-1269		PEA15	0.0054976		PPIE	0.00259159
TNS4	3		BRAP	0.00039114		PCED1A	0.233757		CDK2AP1	-1269		NUF2	0.00549009		CD55	0.00257892
INTS6	3		TXN2	0.00037991		TNS4	0.233639		LRCH3	-1270		IQGAP3	0.0054697		TEK	0.00257212
RAB11A	3		NUF2	0.00037773		RNF213	0.233639		ALOX5	-1270		MSR1	0.0054697		HOMER1	0.00256718
CNST	3		FCGR2A	0.00037613		RND3	0.233559		CBFA2T3	-1270		ASPH	0.0054697		TEX10	0.00256687
DOCK1	3		ZC3H18	0.00037517		REEP4	0.233559		HOMER1	-1270		RAD17	0.0054236		FCN2	0.00256002
TPX2	3		RRAS2	0.00036815		SHROOM1	0.233559		UBASH3A	-1271		TRAF3IP2	0.00538003		PPP1R7	0.00253135
F13A1	3		PCED1A	0.00036622		SPIRE1	0.233559		DAPK1	-1272		SBF2	0.00537282		FOXO4	0.00252474
MITF	3		PSAP	0.00036183		PRAM1	0.23352		ITGAX	-1273		ZMYM6	0.00537282		LIG3	0.00251415
GPRC5C	3		RRAGB	0.00035807		SEZ6L2	0.233441		RAB11A	-1273		TLN2	0.00537282		PPP1R9A	0.0025107
MKNK1	3		DDX54	0.00035058		SBF2	0.233322		C7orf50	-1275		DSN1	0.0053656		ANAPC7	0.00250547
GLI3	3		IFNGR1	0.0003504		ZMYM6	0.233322		APOBEC3G	-1275		DNAJB12	0.00533819		PSAP	0.00250129
BATF2	3		RBFOX1	0.0003494		TLN2	0.233322		RNF213	-1275		AXL	0.00533426		FCGR2A	0.0024899
AP1B1	3		PRAM1	0.00034545		TOB1	0.233243		MEOX1	-1276		CDK15	0.00527885		MITF	0.00248933
CCNB2	3		PID1	0.00034231		ABI3	0.233164		EID3	-1276		ROPN1	0.00525292		MAN1A2	0.00247153
RBPJ	3		TRIM33	0.0003419		AP1B1	0.233164		HGF	-1276		PRKAR2B	0.00524937		NTRK3	0.00245868
BICD1	3		NASP	0.0003391		RBFOX1	0.233085		EMP1	-1277		TRPM6	0.00524089		ATP6V1D	0.00245797
RABEP1	3		EIF2AK3	0.00033877		CPNE8	0.233085		TCHP	-1277		ZNF646	0.00522865		STAB1	0.00245766
ATG16L2	3		FLI1	0.00033846		PTAFR	0.233085		CD19	-1278		TCF20	0.00522865		ATRX	0.0024454
LTBR	3		FCGR2B	0.00033692		MON2	0.233006		VEGFA	-1280		OCRL	0.00521227		IL1R2	0.00243521
TCHP	3		FOSL2	0.00033491		PSAP	0.232849		RMI2	-1280		CDR2	0.00521147		RBPJ	0.00242058
SYNE2	3		LRCH3	0.00032486		SMC5	0.23281		SMIM3	-1280		HOMER3	0.00519451		GSN	0.002418
OSBPL10	3		MAP3K11	0.00032346		PSMD7	0.232731		DUSP3	-1280		FCGR2B	0.00519352		ELL2	0.00241422
CHN2	3		EID3	0.00032234		DNAJB12	0.232731		ZNF646	-1280		CTBP2	0.00519139		PRDX6	0.00240255
BRK1	3		IMPDH1	0.00031786		SEL1L	0.232613		TCF20	-1280		MYB	0.00509427		NGF	0.00237397
ANAPC7	3		GLUL	0.00030772		FAM20C	0.232613		TEK	-1281		RAD21	0.00506017		PSMB9	0.00236973
CDK2AP1	3		DOCK5	0.00030608		CD9	0.232535		MAP3K11	-1281		SUV420H2	0.00505059		ATAD2	0.00236821
FOXO4	3		NGF	0.00030323		TNFRSF10B	0.232417		MEST	-1282		BGN	0.00504363		EIF2AK3	0.002366
ZNF331	3		DUSP6	0.00030306		COPRS	0.232417		TIMP2	-1282		NOXA1	0.0050038		ASAH1	0.00234307
MED17	3		RASAL2	0.00029788		IL2RG	0.232339		NSA2	-1283		ATF7IP	0.00498167		SPARC	0.00234155
RASSF8	3		MEOX1	0.00029638		FAM46A	0.23226		PHC3	-1283		TAL1	0.00492471		EMP1	0.00233246
NGF	3		ABHD16A	0.00029527		WNK2	0.23226		ASAP1	-1283		C3	0.00492051		CXCL2	0.0023228
ID2	3		BASP1	0.00029439		ARHGAP18	0.23226		GPRC5C	-1283		DOCK1	0.0049165		DOCK1	0.0022992
APOD	3		IFIT2	0.00029269		DUSP9	0.23226		PAWR	-1284		SPP1	0.00491521		SMIM3	0.00229663
RPL27A	3		NAA10	0.0002924		COA1	0.23226		TOPORS	-1285		SH3RF3	0.00487258		UBASH3A	0.00229658
RNF213	3		MPP1	0.00029151		IGLC1	0.23226		AIP	-1286		ARHGAP33	0.00487258		ARL2	0.00227583
MAP3K11	3		BGN	0.00028383		IGJ	0.23226		SYT17	-1286		VWF	0.00487258		KCTD12	0.00226399
LIG3	3		STARD13	0.00028328		ARF4	0.23226		INTS6	-1286		ARHGAP15	0.00487258		GLUL	0.0022589
NASP	3		BRK1	0.00027252		LAMC3	0.232104		NOTCH2	-1286		CRADD	0.00484898		EPHB6	0.0022541
PRDX6	3		RPL27A	0.00027193		GLUL	0.231987		PDLIM7	-1289		RNF213	0.00483562		STARD13	0.00224963
USP32	3		NDNL2	0.00026045		ACVR1B	0.231947		ATP5I	-1290		GLUL	0.00482066		LAMP1	0.00224916
ST14	3		SMC6	0.00026045		SMARCC1	0.231908		TESC	-1291		SUOX	0.00479384		USP14	0.00223563
PPP1R26	3		CDA	0.00026028		NFATC4	0.23183		EML4	-1291		RPS21	0.00474497		PCED1A	0.00221213
TLR7	3		IL1R2	0.00025837		DSTYK	0.23183		GLUL	-1291		SEL1L	0.00470643		IL18	0.00219884
HDAC10	3		AP1B1	0.00025831		RPL38	0.231402		ABHD16A	-1293		ATP2A3	0.00470584		PBK	0.00219581
VCAN	3		FBXO11	0.000258		IL18	0.231363		SPC25	-1293		BCL2L13	0.00468163		SYT17	0.00219298
KLK9	2		WNT7B	0.00025575		KLHL5	0.231363		MAP4K2	-1294		ZNF703	0.00468163		TCERG1	0.00218538
TLR3	2		STRBP	0.00025522		MPPED1	0.231363		WNT7B	-1295		ERAP1	0.0046268		TGFB2	0.00218324
WNK2	2		UBE2T	0.0002541		DALRD3	0.231363		TLR5	-1297		MVP	0.00460214		GLTSCR2	0.00218282
IL32	2		TEK	0.00025216		PROC	0.231363		CELSR3	-1299		EFEMP2	0.00458566		PRAM1	0.0021639
USPL1	2		JDP2	0.00025093		C3	0.231324		GRIK5	-1299		STARD13	0.00457382		DUSP6	0.00216183
C1QC	2		ASAP1	0.00025052		PTGS2	0.231247		ZFP36	-1299		FBXO11	0.00457116		IGKC	0.00214929
FCN2	2		EPHB6	0.00024524		ID2	0.230937		RASSF4	-1302		CTAGE5	0.00455197		PPP1R26	0.00214519
FCN1	2		MAZ	0.00024488		MS4A1	0.230937		HSH2D	-1302		LZTFL1	0.00454584		OXSR1	0.00214411
DYNLT3	2		UBXN2A	0.0002447		E2F2	0.230859		LYZ	-1303		UBE2L6	0.00453595		INPPL1	0.00213244
IFNAR1	2		CREM	0.00024341		SIGLEC5	0.230782		APC2	-1304		TIFA	0.00449904		TLR3	0.00208525
MAPK8IP3	2		NOXA1	0.00024181		PLAUR	0.230743		NOL4L	-1305		ASL	0.00449644		ERLEC1	0.00208174
DLEU1	2		NSA2	0.00024054		ATP6V1D	0.230666		MAPK8IP3	-1307		TGFBR1	0.00446915		MAPK8IP3	0.00205145
METTL18	2		ATP1B1	0.0002391		NUF2	0.230589		ANKRD27	-1307		IL3RA	0.00433759		UNG	0.00204158
TREM1	2		OSBPL10	0.0002388		TRPM6	0.230512		ASF1A	-1308		THRB	0.00430106		APOBEC3G	0.00202708
PCYT2	2		BEND7	0.000235		NFKBIL1	0.230319		EAF2	-1309		RIN2	0.00426489		SERPING1	0.00202403
REPS2	2		ARHGEF5	0.00023458		TXN2	0.229935		LST1	-1309		PRAM1	0.00424949		GALK1	0.00202127
ZNF205	2		ATAD2	0.00023191		DTNB	0.229782		PSMB9	-1311		ATP6V1D	0.00424441		XBP1	0.00201321
FLI1	2		CD63	0.00022868		CRADD	0.229743		RBM5	-1311		IL18	0.00423531		TCHP	0.00201131
ZCCHC11	2		ATF3	0.00022797		THRB	0.229705		ANAPC7	-1311		RBFOX1	0.00422673		FBXL12	0.00200288
ZEB2	2		SYT17	0.00022463		RNF135	0.229667		SUB1	-1312		PTGS2	0.00421156		HGF	0.00200078
ERO1LB	2		ANAPC7	0.00022446		FAM214A	0.229667		STK38L	-1313		OTUD1	0.00420666		OAS2	0.00199629
ERLEC1	2		HSBP1	0.00022117		DMTN	0.229667		KIF13B	-1313		TNK2	0.00420229		SSX3	0.00197094
ARHGEF12	2		FBXL12	0.00021717		ITPKB	0.229667		CXCL1	-1313		TRIB1	0.00417439		TOP2A	0.00196361
IGKC	2		PTGS2	0.00021708		MTFR2	0.229667		UNG	-1313		PSAP	0.00414275		IFNGR1	0.00196271
IGHD	2		ORC2	0.00021596		DLGAP5	0.229667		MED17	-1313		SOX5	0.00413672		CSAD	0.00195938
CRADD	2		CNST	0.0002125		GNG5	0.229667		IGHD	-1314		LAMC3	0.00412939		RYR1	0.00195712
NUAK1	2		CXCL2	0.00020117		SETD1A	0.22959		LAMP1	-1315		RNF135	0.00412198		CELF3	0.00195697
LATS2	2		NDRG2	0.00020015		OXSR1	0.229552		FBXL12	-1315		FAM214A	0.00412198		HID1	0.00195685
LAMP1	2		TCERG1	0.00020013		HCK	0.229514		DDX54	-1316		DMTN	0.00412198		ZNF205	0.00195506
FAM219A	2		EMP1	0.00019743		APOE	0.229475		HTRA1	-1317		ITPKB	0.00412198		ARHGEF5	0.00194028
SEL1L	2		RNF213	0.00019248		NUCB2	0.22917		NGF	-1317		DLGAP5	0.00412198		CCNB2	0.00193685
ERAP1	2		MYO10	0.000192		GLRX	0.22917		RRAGB	-1318		MTFR2	0.00412198		TLR7	0.00193482
RAD54L	2		RYR1	0.00018415		UBE2L6	0.229018		ANAPC5	-1319		GNG5	0.00412198		IGHD	0.00193152
PAWR	2		STK38L	0.00018369		PPP1R7	0.229018		IL18	-1320		CXCL8	0.00412169		APMAP	0.00193073
RIN1	2		SPAG5	0.00018252		SUV420H2	0.228866		RAB13	-1321		TIMP2	0.0041174		RPL27A	0.00192532
RPL38	2		TGFB2	0.00018228		TRIM8	0.228752		PSMD7	-1322		NUCB2	0.00410314		PSAT1	0.00191982
WIPI2	2		CTSV	0.00018193		PBLD	0.228676		BASP1	-1322		GLRX	0.00410314		PPP2R4	0.00190827
GLTSCR2	2		ATP2A3	0.00017876		BCL2L13	0.228676		FOXO4	-1322		PCED1A	0.00409571		BEND7	0.00190056
DDX54	2		HMOX1	0.00017731		ZNF703	0.228676		PNRC2	-1323		MS4A1	0.00404461		RNF213	0.00188982
C7orf50	2		ZNF205	0.00017558		MED6	0.228638		KMT2A	-1324		AP1B1	0.00402705		MAZ	0.00188665
NSA2	2		DAPK1	0.00017372		DSN1	0.228638		SEZ6L2	-1324		ETV5	0.00401502		IFNGR2	0.00188369
UBASH3A	2		CTAGE5	0.00017188		TRIB1	0.228524		TOB1	-1325		CD19	0.00399621		MAP4K2	0.00187828
EML4	2		PBK	0.00016826		STARD13	0.227806		PLK4	-1326		ZNF331	0.00394175		CNST	0.00187121
ZNF516	2		XBP1	0.0001671		PBK	0.227693		NDNL2	-1326		C7orf26	0.00393393		GRIN2A	0.00187031
ENPP1	2		CXCL1	0.00016217		CEBPD	0.227543		SMC6	-1326		VWA9	0.00393393		MED17	0.0018508
IMPDH1	2		FAM219A	0.00015993		CDK15	0.22743		LSM7	-1326		HIST1H2BD	0.00393393		SIPA1L2	0.00184486
MEF2C	2		OXSR1	0.00015633		OGT	0.227243		LATS2	-1327		XBP1	0.00393356		LOXL3	0.00184354
HERPUD1	2		NUAK1	0.00015532		CFB	0.227243		LAMTOR2	-1327		ZFP36	0.00386488		RBM5	0.00183547
XBP1	2		IGKC	0.00015294		PPIE	0.227205		TYROBP	-1328		HSD17B14	0.00386138		THRB	0.00183331
SFTPD	2		SMIM3	0.00014717		ERAP1	0.227205		CBS	-1329		ID2	0.0037932		LGMN	0.0018232
IL34	2		NFATC4	0.00014643		DOCK5	0.227056		RIN1	-1329		ATF3	0.00377277		UBXN2A	0.00182295
GCA	2		SVEP1	0.00014495		LRSAM1	0.226943		EMILIN1	-1329		SMARCC1	0.00370833		NFATC4	0.00181731
TBC1D7	2		BLK	0.00014076		DST	0.226794		ETV5	-1329		PPP1R7	0.00370775		GTF3C1	0.0018154
OSM	2		EMILIN1	0.00013981		FUBP3	0.226682		PRR5L	-1329		HIF3A	0.00369493		JARID2	0.00180297
EIF2AK3	2		FCN2	0.00013698		RPP14	0.226459		DEPTOR	-1329		FOXO3	0.00369493		ECT2	0.00180179
KIF13B	2		LAMP1	0.00013579		SETD7	0.226235		BICD1	-1329		BHLHE41	0.00369493		MRPL28	0.00179506
EPHB6	2		UBASH3A	0.00013574		CUX1	0.226161		CREM	-1330		RHOB	0.00367819		DYNLT3	0.00178567
IFNGR2	2		HTRA1	0.00013453		AP1AR	0.226161		SPARC	-1330		NEO1	0.00364945		VANGL1	0.00177862
IFNGR1	2		DSTYK	0.00013373		E2F5	0.226161		DBI	-1330		DOCK4	0.0036294		CCDC8	0.00177825
URM1	2		MAP4K2	0.00013116		ATF3	0.226013		ST14	-1332		SETD1A	0.0036268		EMILIN1	0.00177584
IL18	2		VAMP7	0.00013017		WIPI2	0.225976		LOXL3	-1333		HMMR	0.00361924		NOLC1	0.00177311
PHRF1	2		NOTCH2	0.00012804		FABP3	0.225976		NTRK3	-1334		TPX2	0.00361924		ATP2A3	0.001756
ELL2	2		GRIK5	0.00012376		RIN2	0.225976		USP14	-1334		E2F2	0.00361624		DBI	0.00174134
IL17RA	2		CENPF	0.00012228		BATF2	0.225939		ELL2	-1335		RPP14	0.00360016		EML4	0.00173789
GLUL	2		VANGL1	0.00012054		CCDC9	0.225865		DLG4	-1335		MIDN	0.0035456		PARP11	0.00173422
CREM	2		SUB1	0.00011941		CWC15	0.225865		TREM1	-1336		CCDC69	0.0035456		NUAK1	0.00173014
SETX	2		HRK	0.00011877		PDGFB	0.225791		VAMP7	-1336		RCOR2	0.00353423		LTBR	0.00172917
TNFRSF10B	2		RAD17	0.00011492		ADAM22	0.225791		IMPDH1	-1337		PAXBP1	0.00353423		DUSP3	0.00172294
CEACAM1	2		INTS6	0.00011453		MIDN	0.225384		ARL2	-1338		ATG2B	0.00353423		DOK1	0.00170971
NRP1	2		SERPING1	0.00011343		CCDC69	0.225384		STAB1	-1338		AKAP8L	0.00353423		HAVCR2	0.00170598
VAMP7	2		ELL2	0.00011249		PARP11	0.225348		BEND7	-1339		MKNK1	0.00351553		CEACAM1	0.00170485
ANKRD27	2		ARHGEF12	0.00010743		PWWP2B	0.225348		SMC5	-1340		TRIM8	0.0035149		ARHGEF12	0.00167926
STX7	2		SSX3	0.00010546		APLN	0.225348		CEBPD	-1340		RAB5A	0.00350786		RASAL2	0.00167336
TGFA	2		GTF3C1	0.00010528		SDPR	0.225311		MRPL28	-1340		AGRN	0.00349325		KIAA0226	0.00166899
PBK	2		PNRC2	0.00010445		CD33	0.2252		URI1	-1340		APOE	0.00345847		RAD17	0.00166605
TLR5	2		KCNAB1	0.00010271		ZFP36	0.2252		LGMN	-1340		OGT	0.00343169		DAPK1	0.00165868
WNT7B	2		SMCHD1	0.00010005		PEA15	0.22509		RASAL2	-1341		APOL1	0.00340035		TLR5	0.00165458
NRARP	2		SFTPD	9.847e-05		RBPJ	0.225053		PPIE	-1341		ACPP	0.00340035		STK38L	0.0016517
SLC22A6	2		FCN1	9.61e-05		IQGAP3	0.225016		SVEP1	-1341		CEBPD	0.00339981		HRK	0.00163557
TAF12	2		TLR3	9.546e-05		MSR1	0.225016		LRG1	-1341		POLB	0.00339401		PDE9A	0.00163502
SPHK1	2		EPB41L2	9.37e-05		ASPH	0.225016		IFNGR2	-1342		SDPR	0.00336456		PBLD	0.00163117
GCSAM	2		TONSL	8.958e-05		CD19	0.224649		OSTC	-1342		PLAUR	0.00336321		MPHOSPH9	0.00162533
MLLT10	2		SPARC	8.805e-05		ATP2A3	0.22443		HAVCR2	-1342		AURKAIP1	0.0033614		KHDRBS3	0.00161689
UPK3A	2		OAS2	8.645e-05		EIF2AK3	0.224393		WIPI2	-1344		TXN2	0.00335323		MRPS31	0.00157933
CTH	2		KHDRBS3	8.613e-05		TIMP2	0.224284		NSMCE4A	-1344		DERL1	0.00334954		C7orf50	0.00157605
TWSG1	2		LAD1	8.401e-05		OTUD1	0.224284		PTX3	-1345		DOCK5	0.00334032		SFTPD	0.00156007
RNF135	2		NTRK3	8.298e-05		RHOJ	0.224174		STX7	-1345		SPATA5	0.00333079		LATS2	0.00153867
WDR24	2		TOP2A	8.161e-05		SERPING1	0.224065		FAM20C	-1345		TMEM59	0.00333079		CENPF	0.00152598
SOD3	2		KCTD12	8.129e-05		PER3	0.223919		PCBP4	-1345		SLC1A3	0.00328987		REPS2	0.0015225
STARD13	2		EML4	8.105e-05		RRM2B	0.223919		IL6ST	-1346		RMI2	0.00327525		LZTFL1	0.00151159
SNAPC3	2		LZTFL1	8.065e-05		CASK	0.223592		PINK1	-1347		ACVR1B	0.0032593		NOXA1	0.00150616
SHCBP1	2		C7orf50	7.989e-05		RMI2	0.223592		FCN1	-1348		DTNB	0.00322252		FABP3	0.00149989
UBXN4	2		ZFR	7.988e-05		OAS2	0.223339		RNF144B	-1348		GLCCI1	0.0032172		KCNAB1	0.00149178
APOBEC3G	2		KLK9	7.96e-05		MARCKS	0.223339		EPAS1	-1348		MED6	0.00320462		ATG16L2	0.00148343
CTTNBP2NL	2		RAB13	7.919e-05		RHOB	0.223266		EVI5	-1348		SIGLEC5	0.00320173		PNRC2	0.00147285
CXCL12	2		APOBEC3G	7.821e-05		SNX7	0.22323		CEACAM1	-1349		ELP4	0.0031956		RHOU	0.00146494
CCR10	2		RTCB	7.782e-05		CATSPER1	0.223194		KCNIP3	-1349		ERCC6L2	0.0031956		GLCCI1	0.00145768
CXCL1	2		CSAD	7.765e-05		EXOSC8	0.223122		CEBPE	-1349		SETD7	0.00318746		FUBP3	0.00145714
KIAA1958	2		CEACAM1	7.52e-05		MKNK1	0.223013		FBXO5	-1349		WNK2	0.00318717		UBL4A	0.00145138
IKZF2	2		ATG16L2	7.434e-05		LRR1	0.222941		GALK1	-1350		CFB	0.00318557		NCAPH	0.00145138
EDA	2		CCDC8	7.343e-05		FBXO11	0.222941		ATP6V1D	-1351		CUX1	0.00317128		PSENEN	0.00145138
DIS3	2		RBM5	7.251e-05		CASP8AP2	0.222905		MEF2C	-1351		AP1AR	0.00317128		UBE2C	0.00145138
CD24	2		MAP3K8	7.242e-05		EML4	0.222905		SFTPD	-1351		E2F5	0.00317128		GADD45B	0.00145138
JUND	2		KIAA0226	6.875e-05		UNG	0.222905		UBE2T	-1351		UBXN2A	0.00316681		IL34	0.00145138
PSENEN	2		RNF144B	6.795e-05		ITGAX	0.222761		IFNGR1	-1353		RBM5	0.00316153		METTL18	0.00145138
ABHD16A	2		MAPK8IP3	6.679e-05		GLCCI1	0.222761		INPPL1	-1354		PBK	0.00312973		NEO1	0.00145138
HMOX1	2		THRB	6.611e-05		KLF11	0.222725		JUND	-1354		FABP3	0.00312795		IRF5	0.00145138
LPCAT2	2		PARP11	6.607e-05		SPAG5	0.222689		CACNA1I	-1355		PBLD	0.0031188		PHRF1	0.00145138
CUEDC1	2		PDE9A	5.913e-05		XBP1	0.222509		MPP3	-1355		BACE1	0.00311848		ITGAM	0.00145138
FOXP3	2		FAM20C	5.698e-05		RBM5	0.222473		RAB31	-1355		ITGAX	0.00311387		URM1	0.00145138
SIPA1L2	2		HID1	5.671e-05		HIF3A	0.222366		HID1	-1358		ABI3	0.00310571		TNFRSF10B	0.00145138
STAB1	2		PSAT1	5.517e-05		FOXO3	0.222366		APMAP	-1358		ZBTB22	0.00308567		SOCS6	0.00145138
C19orf10	2		DBI	5.505e-05		BHLHE41	0.222366		FCN2	-1361		SSR2	0.00306288		RAB3D	0.00145138
HSPA13	2		SIPA1L2	5.431e-05		ANXA5	0.222294		CXCL12	-1361		UBXN4	0.0030523		IER3	0.00145138
DNAJB12	2		CELF3	5.369e-05		SUOX	0.222222		CCR10	-1361		EIF2AK3	0.00303656		SLC35F6	0.00145138
WSB2	2		TCHP	5.366e-05		FOSL2	0.222186		CCR1	-1361		ERO1LB	0.00303086		CCL4	0.00145138
IER3	2		HJURP	5.363e-05		BACE1	0.222186		VCAN	-1361		NSA2	0.00301147		ADAM8	0.00145138
FRA10AC1	2		IL1RN	5.214e-05		TGFB2	0.222151		DYNLT3	-1362		PPP2R4	0.00300551		ERO1LB	0.00145138
MEF2BNB	2		IL1A	5.214e-05		PPP2R4	0.222115		ZNF205	-1362		UNG	0.00300113		DTNA	0.00145138
DUSP6	2		HOMER1	5.13e-05		ZNF646	0.222079		GRIN2A	-1364		LATS2	0.00299658		PLEKHJ1	0.00145138
KCNAB1	2		CPNE6	4.908e-05		TCF20	0.222079		UBXN2A	-1364		APLN	0.0029877		MBD4	0.00145138
VANGL1	2		HAVCR2	4.796e-05		RTN1	0.222043		CCL8	-1364		PWWP2B	0.0029877		TNPO2	0.00145138
CUX1	2		REPS2	4.55e-05		FZD8	0.222043		PPP1R26	-1367		FUBP3	0.00291353		TCEAL1	0.00145138
HJURP	2		ZNF646	4.509e-05		DOCK8	0.222007		DOCK1	-1368		SERPING1	0.00288591		FRA10AC1	0.00145138
UNG	2		TCF20	4.509e-05		PDE6D	0.221936		PSAT1	-1368		PARP11	0.00283878		SETD7	0.00145138
STIL	2		LOXL3	4.381e-05		HDAC10	0.2219		C1QB	-1369		ZNF264	0.00278189		TNS4	0.00145138
IKBIP	2		IFNGR2	4.181e-05		GP6	0.221829		C1QC	-1369		SCAI	0.00278189		IL2RG	0.00145138
EXOC4	2		UNG	4.027e-05		TRIM33	0.221722		ECT2	-1371		ZFP82	0.00278189		PEA15	0.00145138
RNF126	2		RIN1	4.025e-05		SIPA1L2	0.221543		ZBP1	-1371		ZFP1	0.00278189		PSD	0.00145138
RAB3D	2		LTBR	3.985e-05		NEO1	0.221472		ZNF516	-1371		TRIM33	0.00278172		NAMPT	0.00145138
RAD17	2		IGHD	3.887e-05		PAWR	0.221472		FBXO32	-1371		SIPA1L2	0.00276957		VSIG4	0.00145138
UBE2T	2		JUND	3.886e-05		ETV5	0.221401		GLI3	-1371		HCK	0.00273723		PCYT2	0.00145138
SVEP1	2		EXOC4	3.881e-05		GPX7	0.221365		XBP1	-1373		OAS2	0.00272729		HERPUD1	0.00145138
EIF4B	2		FABP3	3.762e-05		CD55	0.221365		DERL1	-1373		OXSR1	0.00268112		CTTNBP2	0.00145138
ADRB1	2		PPP2R4	3.688e-05		GADD45B	0.22133		IL1R2	-1373		BRAP	0.00263257		RNF126	0.00145138
PFKFB3	2		MRPS31	3.323e-05		CDKN3	0.221259		MYOG	-1373		GADD45B	0.00262818		RIOK2	0.00145138
MALSU1	2		MKNK1	3.3e-05		CKS2	0.221259		APLP2	-1373		PLEKHA4	0.0026218		FAM20C	0.00144532
MPHOSPH9	2		PAX8	3.247e-05		RRM2	0.221259		SUFU	-1373		RRM2	0.00261484		DDX54	0.00144036
FAM214B	2		TNFRSF21	3.09e-05		APOL1	0.221081		TSTA3	-1373		CDKN3	0.00261484		LAD1	0.00143588
CNTFR	2		RHOU	2.866e-05		ACPP	0.221081		TLR7	-1374		CKS2	0.00261484		CXCL1	0.0014189
APOL6	2		GLCCI1	2.632e-05		RPS21	0.22094		VSIG4	-1375		LRCH3	0.00259542		INTS6	0.00141789
LRRC29	2		CCNB1	2.315e-05		SPATA5	0.220869		METTL18	-1375		SPAG5	0.00259121		TNFRSF21	0.00140776
PSAP	2		MON2	1.97e-05		TMEM59	0.220869		PCYT2	-1375		DOCK8	0.00258297		LAMTOR2	0.00137019
ADAP2	2		CRADD	1.682e-05		UBXN2A	0.220833		ERO1LB	-1375		HERPUD1	0.00255379		GCA	0.00136649
DAPK1	2		DLEU1	1.598e-05		HERPUD1	0.220692		IRF5	-1375		SERTAD3	0.00254082		MKNK1	0.00135458
BRAP	2		LATS2	1.596e-05		SERTAD3	0.220621		HERPUD1	-1375		HELB	0.00254082		JUND	0.00134982
SPC25	2		MRPL28	1.449e-05		HELB	0.220621		IL34	-1375		LSM7	0.00254059		MAP3K8	0.00134093
KIF15	2		ATRX	1.379e-05		SH3BP2	0.220551		GCA	-1375		RTN1	0.00253657		SUV420H2	0.00132313
FAM214A	2		RPL38	1.305e-05		DERL1	0.220515		URM1	-1375		FZD8	0.00253657		PAX8	0.00132033
INHBA	2		ECT2	7.52e-06		ZBTB22	0.220515		PHRF1	-1375		FAM46A	0.00251414		SUB1	0.0013081
ACVR2A	2		NOLC1	0		HP	0.220374		TNFRSF10B	-1375		SCML1	0.00250809		HJURP	0.0013035
UBE2C	2		RASSF4	0		UBXN4	0.220374		IL1RN	-1375		URB1	0.002501		ZFR	0.00129944
SKAP2	2		CTNNBIP1	0		LRCH3	0.220339		IL1A	-1375		PAPD5	0.002501		KLK9	0.00129629
PAX8	2		DEPTOR	0		C7orf50	0.220304		DTNA	-1375		NOL9	0.002501		IL1A	0.00120521
RAB6A	2		PBLD	0		PLEKHA4	0.220128		CTTNBP2	-1375		CCDC86	0.002501		IL1RN	0.00120521
HTRA1	2		C1QB	0		BRAP	0.220057		PSENEN	-1375		WHSC1	0.002501		ZNF646	0.00120383
ADAM8	2		JARID2	0		NGF	0.219952		UBL4A	-1375		NOC3L	0.002501		TCF20	0.00120383
CITED2	2		KIAA0930	0		ZEB2	0.219847		IER3	-1375		ANXA5	0.00248406		EXOC4	0.00120022
FAM20C	2		LAMTOR2	0		PCID2	0.219847		FRA10AC1	-1375		SFTPD	0.00248364		RMI2	0.00114469
APMAP	2		RALGPS2	0		MAP3K11	0.219742		RNF126	-1375		MAP4K2	0.00247243		CPNE6	0.00113639
LRG1	2		FUBP3	0		RCOR2	0.219707		RAB3D	-1375		APPBP2	0.00246885		C1QC	0.00113209
TGFB2	2		RMI2	0		PAXBP1	0.219707		SETD7	-1375		PDGFB	0.00245685		C1QB	0.00113209
DLGAP1	2		PRR5L	0		ATG2B	0.219707		UBE2C	-1375		MARCKS	0.00243337		RALGPS2	0.00111949
TCEAL1	2		GRIN2A	0		AKAP8L	0.219707		ADAM8	-1375		CBS	0.00242239		KIAA0930	0.00111949
NOXA1	2		TPX2	0		FBXL12	0.219497		TNPO2	-1375		CELSR3	0.00241967		SHCBP1	0.00111949
RHOU	2		CCNB2	0		LST1	0.219392		TCEAL1	-1375		MASP1	0.00241957		RPL38	0.00111742
NPL	2		RBPJ	0		ALOX5	0.219322		NOXA1	-1375		ST14	0.00241433		SMCHD1	0.00110561
GMDS	2		WNK2	0		RAD54L	0.219252		RHOU	-1375		CD33	0.00239404		RASSF4	0.00107688
PTTG1IP	2		IL32	0		CTH	0.219252		TNS4	-1375		EXOSC8	0.0023854		CRADD	0.00105501
TNS3	2		USPL1	0		NPL	0.219252		PLEKHJ1	-1375		SNX7	0.00236799		CTNNBIP1	0.00102389
RTN1	2		C1QC	0		GMDS	0.219252		TLR8	-1375		APOBEC3G	0.00236696		LRG1	0.00101342
RAB31	2		IFNAR1	0		SFTPD	0.219217		NEO1	-1375		ARG2	0.00233772		PRR5L	0.000990062
TNFRSF10C	2		ZCCHC11	0		TUBG1	0.219148		GADD45B	-1375		TBC1D23	0.00233772		DEPTOR	0.000990062
GSTCD	2		ERAP1	0		MASP1	0.219078		SOCS6	-1375		MOCS2	0.00233772		TLR8	0.000966883
PLEKHJ1	2		RAD54L	0		POLB	0.219008		SLC35F6	-1375		D2HGDH	0.00233772		MON2	0.000958542
LAD1	2		ENPP1	0		APOBEC3G	0.218939		NAMPT	-1375		RBPJ	0.00233439		HLX	0.000950584
DUSP3	2		GCA	0		FCGR2A	0.218834		RIOK2	-1375		SH3BP2	0.00233415		ANAPC5	0.000941793
FERMT2	2		TBC1D7	0		TPX2	0.218591		NCAPH	-1375		LST1	0.00233138		PCBP4	0.000927881
TNFRSF21	2		OSM	0		HMMR	0.218591		PSD	-1375		MAP3K11	0.00230819		SPC25	0.000908963
DMTN	2		IL17RA	0		AURKAIP1	0.218557		MBD4	-1375		CYP27A1	0.00230799		RTCB	0.000899322
MZT1	2		SETX	0		SLC1A3	0.218487		PEA15	-1375		EML4	0.00229852		DLEU1	0.000801654
TLR8	2		NRP1	0		MBD4	0.21828		ITGAM	-1375		GP6	0.0022786		PFKFB3	0.000634827
ITPKB	2		TGFA	0		SSR2	0.21828		IL2RG	-1375		CBFA2T3	0.00227625		ADRB1	0.000634827
NFATC4	2		TLR5	0		ST14	0.218211		CCL4	-1375		ADAM22	0.00224974		EIF4B	0.000634827
ZFR	2		NRARP	0		CBS	0.218211		INHBA	-1376		CD55	0.00223341		HMMR	0.000483793
HYAL2	2		SLC22A6	0		FLI1	0.218142		ACVR2A	-1376		PER3	0.002228		NLRP3	0.000483793
GAS6	2		TAF12	0		TESC	0.218038		TPX2	-1376		RRM2B	0.002228		NLRC4	0.000483793
GLCCI1	2		SPHK1	0		EPHB6	0.218038		HMMR	-1376		CATSPER1	0.00222644		TPX2	0.000483793
HMMR	2		GCSAM	0		CBFA2T3	0.217969		NLRC4	-1376		EVI5	0.00222386		ACVR2A	0.000483793
PHF8	2		MLLT10	0		SEPT8	0.217866		NLRP3	-1376		TGFB2	0.00221151		INHBA	0.000483793
NEO1	2		UPK3A	0		ADAMTS7	0.217866		AREG	-1377		KIF15	0.00218567		SEPT8	4.13166e-16
NOTCH2	2		CTH	0		ELAVL3	0.217866		KLHL5	-1377		PDE9A	0.0021802		ADAMTS7	3.8225e-16
CCDC8	2		TWSG1	0		GUSB	0.217866		ZC3H12C	-1377		BATF2	0.00216803		TRIM47	3.81172e-16
DOCK5	2		RNF135	0		SCMH1	0.217762		YTHDF1	-1377		ECT2	0.00215409		KIF15	3.60202e-16
GRIK5	2		WDR24	0		BASP1	0.217728		ZNF839	-1377		SCMH1	0.00215009		TNS3	3.51335e-16
NLRC4	2		SOD3	0		UBE2J1	0.21759		RASAL3	-1377		TESC	0.00214112		SNX8	3.40071e-16
NLRP3	2		SNAPC3	0		LSM7	0.217487		LRMP	-1377		WIPI2	0.00211431		CD83	3.36836e-16
GADD45B	2		SHCBP1	0		CREM	0.217453		IL32	-1377		LRSAM1	0.00210639		CCDC91	3.31683e-16
SOCS6	2		UBXN4	0		SOCS6	0.217419		ARG2	-1377		FOSL2	0.00208297		ARIH1	3.27759e-16
KHDRBS3	2		CTTNBP2NL	0		DOCK4	0.217419		KLF3	-1377		ENTPD4	0.00208115		FAIM	3.27489e-16
MAN1A2	2		KIAA1958	0		ROBO3	0.21735		USPL1	-1377		TOM1	0.00208115		ARHGEF10L	3.2665e-16
BASP1	2		IKZF2	0		MVB12B	0.21735		CD244	-1377		PRR5L	0.00205947		GUSB	3.23535e-16
PARP11	2		EDA	0		ANAPC7	0.217316		CPSF2	-1377		DEPTOR	0.00205947		PLXND1	3.23055e-16
DOK1	2		DIS3	0		SIGLEC7	0.217042		IFNAR1	-1377		ASRGL1	0.00204094		NRARP	3.21797e-16
GALK1	2		CD24	0		ZNF839	0.21694		R3HDM2	-1377		KIFC2	0.00204094		RNF135	3.19101e-16
CD63	2		CUEDC1	0		RASAL3	0.21694		KIF13A	-1377		FANCG	0.0020393		SUOX	3.18981e-16
SLC35F6	2		FOXP3	0		LRMP	0.21694		CD300LB	-1377		CTTNBP2	0.00203039		CCL16	3.18262e-16
RYR1	2		C19orf10	0		ZNF264	0.216701		KIAA1109	-1377		RAD54L	0.00200926		USE1	3.16944e-16
RBM26	2		HSPA13	0		SCAI	0.216701		RGS12	-1377		CTH	0.00200926		ELAVL3	3.14428e-16
SPARC	2		DNAJB12	0		ZFP82	0.216701		ZNF264	-1377		NPL	0.00200926		REEP4	3.11941e-16
ATP2A3	2		MEF2BNB	0		ZFP1	0.216701		SCAI	-1377		GMDS	0.00200926		TRIM17	3.10234e-16
LGMN	2		CUX1	0		FAM3A	0.216667		ZFP82	-1377		PAWR	0.00200226		FAM214B	3.09395e-16
RBM5	2		STIL	0		EVI5	0.216667		ZFP1	-1377		SPC25	0.00198407		BCL2L13	3.09155e-16
PPP2R4	2		IKBIP	0		ARG2	0.216667		RFXAP	-1377		NGF	0.00198299		SPATS2	3.09155e-16
NAMPT	2		EIF4B	0		TBC1D23	0.216667		KDM8	-1377		LRR1	0.00196056		AAMDC	3.08916e-16
ARSA	2		ADRB1	0		MOCS2	0.216667		NFE2L2	-1377		MBD4	0.0019575		PNPLA2	3.07118e-16
RIOK2	2		PFKFB3	0		D2HGDH	0.216667		RND3	-1377		CASP8AP2	0.00195144		CYTH3	3.06759e-16
NCAPH	2		MALSU1	0		CBLB	0.21653		ZCCHC11	-1377		PDE6D	0.0019444		PKIA	3.06519e-16
TRAK1	2		MPHOSPH9	0		PDE9A	0.216259		PDIA4	-1377		SLC35F6	0.00192186		CD79A	3.0616e-16
BATF	2		FAM214B	0		CELSR3	0.216225		GNA12	-1377		RHOJ	0.00190115		FURIN	3.05321e-16
VIMP	2		APOL6	0		HOMER1	0.215954		ARIH1	-1377		PCBP4	0.00189441		AP4M1	3.05081e-16
ALDH7A1	2		LRRC29	0		IL34	0.21592		FAM3C	-1377		SEPT8	0.00189311		FAM214A	3.04722e-16
PPP3CA	2		ADAP2	0		GCA	0.21592		IL23A	-1377		ADAMTS7	0.00189311		SETD3	3.03344e-16
PCBP4	2		SPC25	0		R3HDM2	0.215852		REEP4	-1377		ELAVL3	0.00189311		JAM2	3.03104e-16
MAP4K2	2		KIF15	0		ETV4	0.215852		APOL1	-1377		GUSB	0.00189311		SH3RF3	3.00767e-16
GLI1	2		FAM214A	0		ENTPD6	0.215852		ACPP	-1377		FBXL12	0.00188476		CUEDC1	3.00408e-16
PSD	2		INHBA	0		ZSWIM8	0.215852		DOCK4	-1377		ZNF839	0.00186693		TBC1D7	3.00108e-16
ANAPC5	2		ACVR2A	0		CLEC4F	0.215852		MEF2A	-1377		RASAL3	0.00186693		FAM46C	2.9921e-16
ARHGEF5	2		SKAP2	0		PHPT1	0.215852		C10orf54	-1377		LRMP	0.00186693		TMEM51	2.9909e-16
CCNY	2		RAB6A	0		KCTD15	0.215852		ETV4	-1377		TNPO2	0.00186043		PTGFRN	2.9885e-16
LOXL3	2		CITED2	0		CDIP1	0.215852		B4GALT3	-1377		LAMP1	0.00185783		LRRC74A	2.97892e-16
CD55	2		LRG1	0		DHX37	0.215852		ERAP1	-1377		CASK	0.00185514		SPHK1	2.97592e-16
DBI	2		DLGAP1	0		ZNF804A	0.215852		RAD54L	-1377		MEF2C	0.00185195		NLRP12	2.97053e-16
PAX5	2		NPL	0		CST3	0.215852		PRAF2	-1377		RHOU	0.00184191		IP6K2	2.96933e-16
PDE9A	2		GMDS	0		VSTM2L	0.215852		ENTPD4	-1377		FOXP3	0.00183804		PHF8	2.96454e-16
MON2	2		PTTG1IP	0		FANCG	0.215818		ENTPD6	-1377		PCID2	0.00183252		VIMP	2.95974e-16
DAG1	2		TNS3	0		LATS2	0.215548		IPO9	-1377		ZEB2	0.00182178		LRRC29	2.95854e-16
MBD4	2		RTN1	0		KIAA0226	0.215481		URB1	-1377		HP	0.0018155		ZNF703	2.94536e-16
PSAT1	2		GSTCD	0		CNTFR	0.215346		PAPD5	-1377		ANAPC7	0.00177618		ZSCAN26	2.94297e-16
PEA15	2		DUSP3	0		AGRN	0.214575		NOL9	-1377		SIGLEC7	0.00176449		ASRGL1	2.94057e-16
SMCHD1	2		FERMT2	0		UBE2C	0.214541		CCDC86	-1377		TLR3	0.00176263		BMP2K	2.92859e-16
SUV420H2	2		DMTN	0		ASRGL1	0.214508		WHSC1	-1377		TUBG1	0.00175482		RND3	2.92709e-16
SERPING1	2		MZT1	0		KIFC2	0.214508		NOC3L	-1377		FNTB	0.00174337		KIFC2	2.92379e-16
STX12	2		TLR8	0		FBXO32	0.214208		RNF113A	-1377		EPHB6	0.00174062		NNT	2.9202e-16
TCERG1	2		ITPKB	0		RHOU	0.214108		PLXDC2	-1377		HIST2H2AA3	0.0017354		BATF	2.91421e-16
TSTA3	2		HYAL2	0		TNS3	0.214042		PALD1	-1377		SAMD1	0.0017354		PAX5	2.90942e-16
THRB	2		GAS6	0		RRAGB	0.213876		ENPP1	-1377		FCGR2A	0.00173443		TSPAN4	2.89983e-16
AAMDC	2		HMMR	0		ARSA	0.213809		SPATA5	-1377		RRAGB	0.00171851		DAG1	2.89983e-16
SUB1	2		PHF8	0		CARD14	0.213809		IMPA2	-1377		HDAC10	0.0017179		KCNQ1	2.89983e-16
RTCB	2		NLRC4	0		METTL15	0.213809		ZSWIM8	-1377		SOCS6	0.00170941		CARD14	2.88845e-16
MTFR2	2		NLRP3	0		CXCL2	0.213776		HERC5	-1377		GPX7	0.00170232		SLC35C2	2.88305e-16
UBXN2A	2		ARSA	0		SORT1	0.213677		CARD14	-1377		ROBO3	0.00170074		APLN	2.87586e-16
ZNF646	2		TRAK1	0		PDLIM7	0.213478		IP6K2	-1377		MVB12B	0.00170074		KIAA1958	2.87467e-16
TCF20	2		BATF	0		MAP4K2	0.213412		JAM2	-1377		ALOX5	0.00167803		EFHD2	2.86748e-16
MAZ	2		VIMP	0		C7orf26	0.212983		ELK1	-1377		GCA	0.00162137		DLGAP5	2.86748e-16
ZFP36	2		ALDH7A1	0		VWA9	0.212983		NUSAP1	-1377		CDAN1	0.00160928		YPEL3	2.8519e-16
HAVCR2	2		PPP3CA	0		HIST1H2BD	0.212983		TBC1D7	-1377		DBI	0.00160725		SLC4A1AP	2.8483e-16
CCL16	2		PCBP4	0		SSX3	0.212523		OSM	-1377		RAD51B	0.00156961		TTC37	2.84471e-16
CCL8	2		GLI1	0		NSA2	0.212392		OSBPL1A	-1377		TAP2	0.00156495		ZDHHC21	2.83273e-16
CXCL2	2		ANAPC5	0		ZNF516	0.212261		EBF1	-1377		SLAMF7	0.00155548		TRAK1	2.80397e-16
ASAH1	2		CCNY	0		PCBP4	0.212229		CTU2	-1377		UBE2C	0.00155036		COPE	2.80157e-16
CPNE6	2		PAX5	0		ERO1LB	0.212196		CSF1R	-1377		HAVCR2	0.00152543		APOL6	2.79917e-16
ITGAM	2		DAG1	0		PLXND1	0.212098		NUCB2	-1377		ZNF516	0.00150818		TOM1	2.79438e-16
FCGR2A	2		SUV420H2	0		ARHGEF10L	0.212098		SLC1A3	-1377		BASP1	0.00150515		DMTN	2.78959e-16
RAB13	2		STX12	0		PCBD2	0.212065		AGPAT2	-1377		CEACAM1	0.00150144		STOM	2.78959e-16
PWWP2B	2		AAMDC	0		SCML1	0.212		CSTA	-1377		KLF11	0.00149613		APOBEC3B	2.78719e-16
IL2RG	2		MTFR2	0		KIF15	0.211967		IL17RA	-1377		TNS3	0.00148542		C9orf72	2.7836e-16
HLX	2		CCL16	0		FNTB	0.211935		RPS21	-1377		HOMER1	0.00147566		ADAP2	2.78e-16
PCED1A	2		PWWP2B	0		MEF2C	0.211772		SLC29A2	-1377		PCBD2	0.00147383		MTMR10	2.78e-16
CCL4	2		HLX	0		CEACAM1	0.211479		SETX	-1377		PLXND1	0.00146745		FOXO3	2.7788e-16
AREG	1		AREG	0		GPRC5C	0.211447		ARAP1	-1377		ARHGEF10L	0.00146745		MEF2BNB	2.77281e-16
KLHL5	1		KLHL5	0		TLR3	0.211447		RIN2	-1377		FLI1	0.0014603		ITPKB	2.77042e-16
ZC3H12C	1		ZC3H12C	0		AIP	0.21135		TPPP	-1377		CREM	0.00145927		GSTO1	2.77042e-16
YTHDF1	1		YTHDF1	0		CCR10	0.211252		NRP1	-1377		FBXO32	0.00145569		CPNE8	2.75843e-16
ZNF839	1		ZNF839	0		RAB3D	0.211155		TGFA	-1377		SVEP1	0.00144536		FERMT3	2.75843e-16
RASAL3	1		RASAL3	0		HMOX1	0.211123		SLC39A7	-1377		ENPP1	0.00142266		PDK1	2.75604e-16
LRMP	1		LRMP	0		MEST	0.211091		NLRP7	-1377		CYTH3	0.00142266		HBS1L	2.75484e-16
ARG2	1		ARG2	0		AREG	0.211058		PCID2	-1377		CARD14	0.00141806		SLC22A6	2.75364e-16
KLF3	1		KLF3	0		CD63	0.211026		NRARP	-1377		METTL15	0.00141806		AURKC	2.74765e-16
CD244	1		CD244	0		ELP4	0.211026		SLC22A6	-1377		ARSA	0.00141806		PLXNB2	2.74645e-16
CPSF2	1		CPSF2	0		ERCC6L2	0.211026		TAF12	-1377		CEP78	0.00141374		DBF4B	2.74405e-16
R3HDM2	1		R3HDM2	0		EMP1	0.210994		CACNA1H	-1377		PDLIM7	0.00141335		COA1	2.74166e-16
KIF13A	1		KIF13A	0		ENTPD4	0.210961		SPHK1	-1377		USP14	0.00140555		HIF3A	2.73806e-16
CD300LB	1		CD300LB	0		TOM1	0.210961		SETD3	-1377		RGS12	0.00139276		WBP2	2.73207e-16
KIAA1109	1		KIAA1109	0		FOXP3	0.210929		LAT2	-1377		FAM192A	0.00139182		PLOD1	2.73207e-16
RGS12	1		RGS12	0		SYT17	0.210703		PRTFDC1	-1377		SCRN1	0.00139182		SLC29A2	2.72967e-16
ZNF264	1		ZNF264	0		RGS12	0.210575		GCSAM	-1377		CCDC186	0.00138163		ODF3L2	2.72488e-16
SCAI	1		SCAI	0		CD24	0.210414		MLLT10	-1377		GPRC5C	0.00136502		TEAD2	2.72248e-16
ZFP82	1		ZFP82	0		CYP27A1	0.210221		SUOX	-1377		NCAPH	0.00136106		KIF3B	2.72248e-16
ZFP1	1		ZFP1	0		SLC4A4	0.210189		UPK3A	-1377		CBLB	0.0013609		DSC2	2.72248e-16
RFXAP	1		RFXAP	0		TNPO2	0.210125		CTH	-1377		KIAA0226	0.0013561		PTAFR	2.72129e-16
KDM8	1		KDM8	0		SVEP1	0.210061		TWSG1	-1377		LRG1	0.00134519		SERPINB13	2.7129e-16
NFE2L2	1		NFE2L2	0		BICD1	0.209805		RNF135	-1377		PALLD	0.00134516		SIGLEC7	2.7105e-16
RND3	1		RND3	0		SPC25	0.209582		WDR24	-1377		IL34	0.00132698		IDH3A	2.70691e-16
PDIA4	1		PDIA4	0		B4GALT3	0.209454		KBTBD4	-1377		VSTM2L	0.00132024		RPL10L	2.70331e-16
GNA12	1		GNA12	0		BMF	0.209454		SOD3	-1377		R3HDM2	0.00132024		STON2	2.69373e-16
ARIH1	1		ARIH1	0		DBI	0.209422		SNAPC3	-1377		ETV4	0.00132024		NUPL2	2.69373e-16
FAM3C	1		FAM3C	0		DEPTOR	0.209359		SPTB	-1377		ENTPD6	0.00132024		EPHX2	2.69013e-16
IL23A	1		IL23A	0		PRR5L	0.209359		CTDSPL	-1377		ZSWIM8	0.00132024		ARHGAP18	2.68174e-16
REEP4	1		REEP4	0		HAVCR2	0.209295		SH3RF3	-1377		CLEC4F	0.00132024		CDC42EP4	2.67455e-16
APOL1	1		APOL1	0		MPEG1	0.209105		UBXN4	-1377		PHPT1	0.00132024		FOXP3	2.67216e-16
ACPP	1		ACPP	0		MT2A	0.209105		CCDC88A	-1377		KCTD15	0.00132024		IGLC1	2.67216e-16
DOCK4	1		DOCK4	0		PNPLA2	0.208914		PKIG	-1377		CDIP1	0.00132024		RPS21	2.66796e-16
MEF2A	1		MEF2A	0		MTMR10	0.208914		PLAU	-1377		DHX37	0.00132024		XPO7	2.66736e-16
C10orf54	1		C10orf54	0		TTC37	0.208914		CTTNBP2NL	-1377		ZNF804A	0.00132024		MYH11	2.66257e-16
ETV4	1		ETV4	0		TMEM57	0.208914		GLRX	-1377		CST3	0.00132024		FAM91A1	2.65778e-16
B4GALT3	1		B4GALT3	0		HEY1	0.208914		KIAA1958	-1377		STAB1	0.00131488		BHLHE41	2.65059e-16
PRAF2	1		PRAF2	0		PPARD	0.208914		IKZF2	-1377		LAMTOR2	0.00131267		SLC1A3	2.63501e-16
ENTPD4	1		ENTPD4	0		STAB1	0.208883		EDA	-1377		LAMB2	0.00129574		GCSAM	2.63501e-16
ENTPD6	1		ENTPD6	0		SMIM3	0.208693		HIF3A	-1377		CXCL2	0.00129041		TRAM1	2.63261e-16
IPO9	1		IPO9	0		ECT2	0.208693		FOXO3	-1377		B4GALT3	0.00128929		FER	2.63142e-16
URB1	1		URB1	0		TCHP	0.20844		CYTH3	-1377		BICD1	0.00126672		ARF4	2.62662e-16
PAPD5	1		PAPD5	0		AAMDC	0.20844		DIS3	-1377		NLRC4	0.00126169		OGDH	2.62423e-16
NOL9	1		NOL9	0		CD83	0.20844		CD24	-1377		NLRP3	0.00126169		YME1L1	2.61224e-16
CCDC86	1		CCDC86	0		FURIN	0.20844		SEC11A	-1377		SORT1	0.00126156		IGJ	2.61224e-16
WHSC1	1		WHSC1	0		PALLD	0.208346		TRAM1	-1377		MEST	0.00124271		TMEM57	2.61224e-16
NOC3L	1		NOC3L	0		LOXL3	0.208031		SLC35C2	-1377		FAM3A	0.00124158		RBMS2	2.60505e-16
RNF113A	1		RNF113A	0		URB1	0.208		ZDHHC21	-1377		ZC3H12C	0.00123003		TRPM6	2.60146e-16
PLXDC2	1		PLXDC2	0		PAPD5	0.208		TMEM51	-1377		YTHDF1	0.00123003		SEC24D	2.60146e-16
PALD1	1		PALD1	0		NOL9	0.208		USE1	-1377		BAMBI	0.00122882		GOLGA3	2.60026e-16
SPATA5	1		SPATA5	0		CCDC86	0.208		CUEDC1	-1377		LOXL3	0.00122093		BTN3A3	2.59786e-16
IMPA2	1		IMPA2	0		WHSC1	0.208		SEPT8	-1377		PLXNB2	0.00121742		CTDSPL	2.59667e-16
ZSWIM8	1		ZSWIM8	0		NOC3L	0.208		FOXP3	-1377		CD24	0.00120184		STX12	2.59547e-16
HERC5	1		HERC5	0		FAM214B	0.207812		LAMB2	-1377		NDNL2	0.00120061		GUCY1A3	2.59307e-16
CARD14	1		CARD14	0		NUSAP1	0.207812		BHLHE41	-1377		SMC6	0.00120061		SLC50A1	2.58828e-16
IP6K2	1		IP6K2	0		LAMP1	0.207687		TSACC	-1377		CD63	0.00119318		GNG5	2.58828e-16
JAM2	1		JAM2	0		NLRC4	0.207687		TBC1D23	-1377		GPHN	0.00119024		ZSWIM8	2.58408e-16
ELK1	1		ELK1	0		NLRP3	0.207687		B3GALT4	-1377		TPCN1	0.00119024		TSACC	2.58109e-16
NUSAP1	1		NUSAP1	0		SLC15A3	0.207655		NFKBIL1	-1377		SLC15A3	0.0011718		C10orf54	2.57869e-16
OSBPL1A	1		OSBPL1A	0		MAPK8IP3	0.207593		METTL15	-1377		MYH11	0.00117161		SHROOM1	2.57629e-16
EBF1	1		EBF1	0		MEOX1	0.207561		FOXN3	-1377		CD83	0.00116517		SH3BP1	2.56671e-16
CTU2	1		CTU2	0		LAMB2	0.207374		COL8A2	-1377		FURIN	0.00116517		ICAM4	2.56671e-16
CSF1R	1		CSF1R	0		NDNL2	0.207093		C19orf10	-1377		AAMDC	0.00116517		ENTPD6	2.56431e-16
NUCB2	1		NUCB2	0		SMC6	0.207093		HSPA13	-1377		STX12	0.00116363		DUSP9	2.56431e-16
SLC1A3	1		SLC1A3	0		FRA10AC1	0.207		NLRP12	-1377		IER3	0.00115278		FNTB	2.56311e-16
AGPAT2	1		AGPAT2	0		ZNF106	0.206938		PPP2R5B	-1377		MPEG1	0.00115205		MKL2	2.54394e-16
CSTA	1		CSTA	0		LRCH4	0.206783		ADPRHL2	-1377		MT2A	0.00115205		TRIOBP	2.54035e-16
RPS21	1		RPS21	0		HLA-DPB1	0.206783		MEF2BNB	-1377		SLC4A4	0.00113418		ZNF106	2.53555e-16
SLC29A2	1		SLC29A2	0		LAMTOR2	0.20669		CDX1	-1377		SSX3	0.00112638		VPS4A	2.53555e-16
ARAP1	1		ARAP1	0		DBF4B	0.206659		RBMS2	-1377		UBE2J1	0.00111766		CPEB3	2.53196e-16
RIN2	1		RIN2	0		KIF3B	0.206659		SLC4A1AP	-1377		TEAD2	0.00111079		SSR2	2.52836e-16
TPPP	1		TPPP	0		CTTNBP2	0.206628		C9orf72	-1377		HSH2D	0.00110646		ENPP1	2.51878e-16
SLC39A7	1		SLC39A7	0		C10orf54	0.206566		HBS1L	-1377		PPARD	0.00109045		WDR20	2.51638e-16
NLRP7	1		NLRP7	0		IP6K2	0.206566		STK40	-1377		PNPLA2	0.00109045		MTFR2	2.51159e-16
PCID2	1		PCID2	0		OGDH	0.206566		ADH1B	-1377		MTMR10	0.00109045		AURKAIP1	2.50799e-16
CACNA1H	1		CACNA1H	0		CCDC186	0.206504		CUX1	-1377		TTC37	0.00109045		TGFA	2.5062e-16
SETD3	1		SETD3	0		SLAMF7	0.206411		ZNF106	-1377		TMEM57	0.00109045		CKS2	2.49721e-16
LAT2	1		LAT2	0		RAD51B	0.20638		STIL	-1377		HEY1	0.00109045		CDH15	2.49481e-16
PRTFDC1	1		PRTFDC1	0		SLC35F6	0.206287		TEAD2	-1377		FRA10AC1	0.00108793		FANCG	2.48283e-16
SUOX	1		SUOX	0		ZNF205	0.206226		IDH3A	-1377		ZNF106	0.00108241		TWSG1	2.48163e-16
KBTBD4	1		KBTBD4	0		IER3	0.206195		IKBIP	-1377		ZNF205	0.00107741		C19orf10	2.47684e-16
SPTB	1		SPTB	0		BAMBI	0.206164		TRIM52	-1377		RAB3D	0.00107196		LAT2	2.46905e-16
CTDSPL	1		CTDSPL	0		FAM219A	0.20601		CYP2C9	-1377		CCR10	0.00106819		METTL15	2.46845e-16
SH3RF3	1		SH3RF3	0		NOTCH2	0.205856		SYNRG	-1377		KMT2A	0.00106544		CREB3L2	2.46605e-16
CCDC88A	1		CCDC88A	0		ZCCHC7	0.205825		ELP4	-1377		STIL	0.00105439		AVPI1	2.46605e-16
PKIG	1		PKIG	0		URI1	0.205672		ERCC6L2	-1377		DLG4	0.00104929		PIGQ	2.45886e-16
PLAU	1		PLAU	0		PTTG1IP	0.205672		COPRS	-1377		SYT17	0.00104679		ACAA1	2.45886e-16
GLRX	1		GLRX	0		HIST2H2AA3	0.205396		MRAS	-1377		IL1R2	0.00104587		OVGP1	2.45407e-16
HIF3A	1		HIF3A	0		SAMD1	0.205396		MALSU1	-1377		SEC11A	0.00104529		PIK3AP1	2.45167e-16
FOXO3	1		FOXO3	0		ANKRD27	0.205212		FAM214B	-1377		EMP1	0.00104169		SCRN1	2.44928e-16
CYTH3	1		CYTH3	0		IL1R2	0.20509		MPEG1	-1377		DBF4B	0.00101503		ZCCHC7	2.44808e-16
SEC11A	1		SEC11A	0		SNX9	0.204999		PNPLA2	-1377		KIF3B	0.00101503		PLEKHA4	2.44448e-16
TRAM1	1		TRAM1	0		RRAS2	0.204999		FCER1A	-1377		URI1	0.00101212		GRAMD3	2.44209e-16
SLC35C2	1		SLC35C2	0		NLRP7	0.204968		BCL2L13	-1377		GRIN2A	0.00100436		SLAMF7	2.43969e-16
ZDHHC21	1		ZDHHC21	0		HERC5	0.204938		OGDH	-1377		RFXAP	0.000996771		TIMM17A	2.43969e-16
TMEM51	1		TMEM51	0		GPHN	0.204877		MOCS2	-1377		ALDH7A1	0.000996771		HEY1	2.43729e-16
USE1	1		USE1	0		TPCN1	0.204877		CEP78	-1377		IL32	0.000992272		SERTAD3	2.42771e-16
SEPT8	1		SEPT8	0		PLD2	0.204846		FAIM	-1377		CDX1	0.000992272		HELB	2.42771e-16
LAMB2	1		LAMB2	0		WNT7B	0.204421		MT2A	-1377		NUSAP1	0.000990936		CDKN3	2.42531e-16
BHLHE41	1		BHLHE41	0		GRIK5	0.204239		STEAP3	-1377		FAM214B	0.000990936		GPHN	2.42172e-16
TSACC	1		TSACC	0		ENPP1	0.204239		APOL6	-1377		BMF	0.000985431		WDR24	2.42052e-16
TBC1D23	1		TBC1D23	0		STX12	0.204239		LRRC29	-1377		FCN2	0.000978968		ZNF185	2.42052e-16
B3GALT4	1		B3GALT4	0		CYTH3	0.204239		ADAMTS7	-1377		AREG	0.000959286		MARVELD2	2.41333e-16
NFKBIL1	1		NFKBIL1	0		IRF5	0.204118		PCBD2	-1377		NLRP7	0.000953659		CARD10	2.40854e-16
METTL15	1		METTL15	0		UBL4A	0.204118		PLD2	-1377		TLR5	0.00093096		COPRS	2.40614e-16
FOXN3	1		FOXN3	0		TGFA	0.204057		ADAP2	-1377		HMOX1	0.000923789		SNAPC3	2.40135e-16
COL8A2	1		COL8A2	0		UPK3A	0.204057		YPEL3	-1377		MAPK8IP3	0.000917329		SBF2	2.39655e-16
NLRP12	1		NLRP12	0		TWSG1	0.204057		MKL2	-1377		CNTFR	0.000907039		SOD3	2.39416e-16
PPP2R5B	1		PPP2R5B	0		SOD3	0.204057		MIDN	-1377		RNF126	0.000906937		TMEM59	2.39416e-16
ADPRHL2	1		ADPRHL2	0		C19orf10	0.204057		MAFB	-1377		TCHP	0.000906224		HSPA13	2.39176e-16
CDX1	1		CDX1	0		HSPA13	0.204057		KIF15	-1377		NOTCH2	0.000903339		UPK3A	2.38816e-16
RBMS2	1		RBMS2	0		DUSP3	0.204057		SPATS2	-1377		INPPL1	0.000898609		NFKBIL1	2.38816e-16
SLC4A1AP	1		SLC4A1AP	0		COL8A2	0.204057		NNT	-1377		SEC24D	0.000889704		SYNRG	2.38577e-16
C9orf72	1		C9orf72	0		NLRP12	0.204057		FAM214A	-1377		HERC5	0.000887629		GFPT1	2.38457e-16
HBS1L	1		HBS1L	0		CDH15	0.204057		SLC7A5	-1377		PIK3AP1	0.000881753		TTC7A	2.37978e-16
STK40	1		STK40	0		TRIM36	0.203876		SLC39A14	-1377		AIP	0.000874776		PPP3CA	2.37259e-16
ADH1B	1		ADH1B	0		CEP78	0.203846		CHP1	-1377		BTN3A3	0.000873896		ZMYM6	2.37019e-16
ZNF106	1		ZNF106	0		FAM192A	0.203756		CDS2	-1377		ETV7	0.000869225		PIP5K1B	2.3654e-16
TEAD2	1		TEAD2	0		SCRN1	0.203756		SKAP2	-1377		SNX9	0.000859897		STT3B	2.3654e-16
IDH3A	1		IDH3A	0		NCAPH	0.203726		PER3	-1377		APLP2	0.000856485		ETV4	2.3636e-16
TRIM52	1		TRIM52	0		ABHD16A	0.203665		EFHD2	-1377		FBXO5	0.000848131		BSG	2.363e-16
CYP2C9	1		CYP2C9	0		APLP2	0.203515		RAB6A	-1377		BATF	0.000847791		BACE1	2.363e-16
SYNRG	1		SYNRG	0		BEND7	0.203455		APBB3	-1377		PKIA	0.000847791		SPIRE1	2.35821e-16
ELP4	1		ELP4	0		HSH2D	0.203425		SPON1	-1377		HK3	0.000843668		PPARD	2.35581e-16
ERCC6L2	1		ERCC6L2	0		DLG4	0.203395		ZNF446	-1377		EDA	0.000836732		RRM2B	2.35102e-16
COPRS	1		COPRS	0		BATF	0.203395		FSTL3	-1377		PCYT2	0.000806565		SPECC1L	2.34263e-16
MRAS	1		MRAS	0		PKIA	0.203395		APLN	-1377		ZCCHC7	0.000796751		FKBP6	2.33904e-16
MPEG1	1		MPEG1	0		GLI3	0.203275		CITED2	-1377		LRCH4	0.000793828		ERAP1	2.33364e-16
PNPLA2	1		PNPLA2	0		ALDH7A1	0.203215		TRIM17	-1377		HLA-DPB1	0.000793828		LAMB2	2.32705e-16
FCER1A	1		FCER1A	0		RFXAP	0.203215		SBF2	-1377		BEND7	0.000784877		KIAA1109	2.32645e-16
BCL2L13	1		BCL2L13	0		CTDSPL	0.203095		ZMYM6	-1377		MAFB	0.000784662		MRPL48	2.32585e-16
OGDH	1		OGDH	0		MKL2	0.203095		FAM192A	-1377		MEOX1	0.000783918		TPPP	2.32346e-16
MOCS2	1		MOCS2	0		PIGQ	0.203095		RAD51B	-1377		CITED2	0.00078273		MT2A	2.31387e-16
CEP78	1		CEP78	0		MRPL28	0.203035		TSPAN4	-1377		FAM109A	0.000771757		PCID2	2.31148e-16
FAIM	1		FAIM	0		LRG1	0.203035		CLEC4F	-1377		ACAA1	0.000768286		CD24	2.31028e-16
MT2A	1		MT2A	0		SPHK1	0.202916		THBD	-1377		RRAS2	0.000767797		DIS3	2.30908e-16
STEAP3	1		STEAP3	0		CSTA	0.202916		FAM46C	-1377		UBE2T	0.000763951		MRPS5	2.30548e-16
ADAMTS7	1		ADAMTS7	0		UBASH3A	0.202856		CCDC9	-1377		PPT1	0.000755183		SLC4A4	2.2935e-16
PCBD2	1		PCBD2	0		ACAA1	0.202766		CWC15	-1377		MRPL28	0.000754572		STK11IP	2.2911e-16
PLD2	1		PLD2	0		KMT2A	0.202617		TRIM47	-1377		GRAMD3	0.000747302		EBF1	2.28272e-16
YPEL3	1		YPEL3	0		CEBPE	0.202617		TRPM6	-1377		DTNA	0.00074216		COL8A2	2.27912e-16
MKL2	1		MKL2	0		ZC3H12C	0.202439		DLGAP1	-1377		DAG1	0.000738393		ZFP82	2.27433e-16
MIDN	1		MIDN	0		YTHDF1	0.202439		TCEAL4	-1377		ANKRD27	0.000738179		EDA	2.27313e-16
MAFB	1		MAFB	0		GRAMD3	0.20232		HOXB5	-1377		GLI3	0.000735104		PLD2	2.27313e-16
SPATS2	1		SPATS2	0		METTL18	0.20226		NPL	-1377		TRIM36	0.000732562		PWWP2B	2.26474e-16
NNT	1		NNT	0		CDAN1	0.202231		GMDS	-1377		CTDSPL	0.000731334		UBXN4	2.26354e-16
SLC7A5	1		SLC7A5	0		SCN5A	0.202201		PTTG1IP	-1377		MKL2	0.000731334		RAD54L	2.26235e-16
SLC39A14	1		SLC39A14	0		TAP2	0.202142		TNS3	-1377		PIGQ	0.000731334		CYP27A1	2.26235e-16
CHP1	1		CHP1	0		STX7	0.202112		CPEB4	-1377		C10orf54	0.00073115		TPCN1	2.26235e-16
CDS2	1		CDS2	0		SLC39A7	0.202112		RTN1	-1377		IP6K2	0.00073115		CPEB4	2.25995e-16
PER3	1		PER3	0		TLR5	0.202082		HK1	-1377		OGDH	0.00073115		SFXN1	2.25995e-16
EFHD2	1		EFHD2	0		RNF126	0.202053		GSTCD	-1377		ANAPC5	0.000726184		FUCA1	2.25276e-16
APBB3	1		APBB3	0		FCN2	0.201964		ZBTB38	-1377		UBL4A	0.00071501		MLLT10	2.24677e-16
SPON1	1		SPON1	0		PLXNB2	0.201964		FAM109A	-1377		IRF5	0.00071501		MPEG1	2.24557e-16
ZNF446	1		ZNF446	0		HYAL2	0.201934		LTK	-1377		KIAA1958	0.000713639		FOXN3	2.23958e-16
FSTL3	1		FSTL3	0		KLF3	0.201934		TOM1	-1377		PIP5K1B	0.000713639		NUCB2	2.2252e-16
APLN	1		APLN	0		FCER1A	0.201934		CPEB3	-1377		SMIM3	0.000712341		UBE2S	2.224e-16
TRIM17	1		TRIM17	0		E2F8	0.201934		LIF	-1377		TGFA	0.000711381		MRPS7	2.21921e-16
SBF2	1		SBF2	0		GRIN2A	0.201875		FERMT2	-1377		UPK3A	0.000711381		STAP1	2.20483e-16
ZMYM6	1		ZMYM6	0		FBXO5	0.201787		SEC24D	-1377		TWSG1	0.000711381		LY86	2.20483e-16
FAM192A	1		FAM192A	0		PTX3	0.201787		DMTN	-1377		SOD3	0.000711381		MARCH7	2.20243e-16
RAD51B	1		RAD51B	0		KIAA1958	0.201727		TMEM59	-1377		COL8A2	0.000711381		AP1AR	2.20123e-16
TSPAN4	1		TSPAN4	0		PIP5K1B	0.201727		E2F8	-1377		C19orf10	0.000711381		NCAPG	2.19045e-16
CLEC4F	1		CLEC4F	0		USP14	0.201698		CD79A	-1377		HSPA13	0.000711381		RAVER1	2.18566e-16
THBD	1		THBD	0		STIL	0.201698		MZT1	-1377		NLRP12	0.000711381		GLRX	2.18206e-16
FAM46C	1		FAM46C	0		CCR1	0.201639		DRP2	-1377		CDH15	0.000711381		RHPN1	2.17966e-16
CCDC9	1		CCDC9	0		IMPDH1	0.201256		UACA	-1377		IMPDH1	0.000701714		RIN2	2.17487e-16
CWC15	1		CWC15	0		PSENEN	0.201227		ITPKB	-1377		ABHD16A	0.000700697		E2F5	2.17128e-16
TRIM47	1		TRIM47	0		INPPL1	0.201227		CD83	-1377		PLD2	0.000695031		SCML1	2.16888e-16
TRPM6	1		TRPM6	0		FAM3C	0.201168		DUSP1	-1377		PTX3	0.000692859		FCER1A	2.16768e-16
TCEAL4	1		TCEAL4	0		SLC29A2	0.201168		MRPS7	-1377		SPTB	0.00069038		DTX1	2.16648e-16
HOXB5	1		HOXB5	0		TRAM1	0.201168		MRPS5	-1377		UBASH3A	0.000690113		COMMD4	2.14971e-16
CPEB4	1		CPEB4	0		SLC35C2	0.201168		SPECC1L	-1377		EFHD2	0.000679003		FERMT2	2.14491e-16
HK1	1		HK1	0		ZDHHC21	0.201168		MRPL48	-1377		VEGFA	0.000678192		DOCK4	2.13173e-16
ZBTB38	1		ZBTB38	0		TMEM51	0.201168		HYAL2	-1377		WNT7B	0.000674663		B3GALT4	2.12814e-16
FAM109A	1		FAM109A	0		USE1	0.201168		GAS6	-1377		CSTA	0.000669611		ETV7	2.12814e-16
LTK	1		LTK	0		TSPAN4	0.201168		PIK3CD	-1377		SPHK1	0.000669611		MALSU1	2.12694e-16
TOM1	1		TOM1	0		SLC50A1	0.201168		PIK3AP1	-1377		NFE2L2	0.000665776		TLN2	2.12574e-16
CPEB3	1		CPEB3	0		ICAM4	0.201168		AURKC	-1377		FAM219A	0.000656059		RPP25	2.12574e-16
LIF	1		LIF	0		C1QB	0.20108		MCPH1	-1377		ELK1	0.000649885		CCDC9	2.12095e-16
SEC24D	1		SEC24D	0		C1QC	0.20108		PHF8	-1377		TPPP	0.000649885		MIDN	2.11256e-16
TMEM59	1		TMEM59	0		MYH11	0.201021		AURKAIP1	-1377		ARAP1	0.000647946		SCAI	2.10537e-16
E2F8	1		E2F8	0		CITED2	0.200758		ZNF277	-1377		IL1RN	0.000647188		ZBTB38	2.10537e-16
CD79A	1		CD79A	0		CCDC88A	0.200582		UNC5B	-1377		IL1A	0.000647188		LTK	2.10537e-16
DRP2	1		DRP2	0		PKIG	0.200582		PIGQ	-1377		APOL6	0.000639467		ARHGAP15	2.09459e-16
UACA	1		UACA	0		PIK3AP1	0.200553		FNTB	-1377		LRRC29	0.000639467		ARHGAP33	2.0826e-16
CD83	1		CD83	0		APOL6	0.200378		RHPN1	-1377		IFNGR1	0.000638292		VWF	2.0826e-16
DUSP1	1		DUSP1	0		LRRC29	0.200378		EPHX2	-1377		PTTG1IP	0.000638128		RRM2	2.08021e-16
MRPS7	1		MRPS7	0		ETV7	0.200232		GRIN1	-1377		IL6ST	0.000632928		MOCS2	2.07901e-16
MRPS5	1		MRPS5	0		TEAD2	0.199826		TBX4	-1377		CREB3L2	0.000630675		ZFP1	2.07871e-16
SPECC1L	1		SPECC1L	0		CREB3L2	0.199826		CDKN3	-1377		SLC39A7	0.000623509		CWC15	2.07541e-16
MRPL48	1		MRPL48	0		HK3	0.199623		CKS2	-1377		IFNAR1	0.000622445		DUSP1	2.07302e-16
PIK3CD	1		PIK3CD	0		SEC11A	0.199566		AP1AR	-1377		FCER1A	0.000619646		PLAU	2.06343e-16
PIK3AP1	1		PIK3AP1	0		DUSP1	0.199566		NIN	-1377		CEBPE	0.000616507		CTH	2.06104e-16
AURKC	1		AURKC	0		MAFB	0.199421		DLGAP5	-1377		GRIK5	0.000615629		SLC15A3	2.05385e-16
MCPH1	1		MCPH1	0		ANAPC5	0.199392		GPHN	-1377		CCR1	0.00061284		LIF	2.04546e-16
AURKAIP1	1		AURKAIP1	0		VEGFA	0.199335		ZBTB47	-1377		STX7	0.000610293		TBX4	2.04426e-16
ZNF277	1		ZNF277	0		RAB13	0.199306		CPNE8	-1377		PSENEN	0.000606527		TBC1D23	2.04066e-16
UNC5B	1		UNC5B	0		KIF13B	0.199277		PTAFR	-1377		FAM3C	0.000603449		CDK15	2.03947e-16
PIGQ	1		PIGQ	0		IL1RN	0.199277		ROBO3	-1377		SLC29A2	0.000603449		NCKAP5	2.03707e-16
FNTB	1		FNTB	0		IL1A	0.199277		MVB12B	-1377		TRAM1	0.000603449		ADH1B	2.03587e-16
RHPN1	1		RHPN1	0		SEC24D	0.199248		ZCCHC7	-1377		SLC35C2	0.000603449		NOC3L	2.03348e-16
EPHX2	1		EPHX2	0		MEF2BNB	0.199191		AP4M1	-1377		ZDHHC21	0.000603449		THBD	2.02149e-16
GRIN1	1		GRIN1	0		NFE2L2	0.199018		CDC42EP4	-1377		TMEM51	0.000603449		HK3	2.0179e-16
TBX4	1		TBX4	0		IL6ST	0.19876		C2	-1377		USE1	0.000603449		B4GALT3	2.0173e-16
CDKN3	1		CDKN3	0		FAIM	0.198645		GOLGA3	-1377		TSPAN4	0.000603449		CSF1R	2.01071e-16
CKS2	1		CKS2	0		IFNGR1	0.198559		PHPT1	-1377		SLC50A1	0.000603449		SPATA5	2.00891e-16
AP1AR	1		AP1AR	0		PCYT2	0.198159		SLAMF7	-1377		ICAM4	0.000603449		OSM	2.00112e-16
NIN	1		NIN	0		NTRK3	0.198159		POLB	-1377		NTRK3	0.000600344		CCNY	2.00112e-16
DLGAP5	1		DLGAP5	0		ELK1	0.198102		TRIOBP	-1377		COMMD4	0.000599644		TERT	1.99873e-16
GPHN	1		GPHN	0		TPPP	0.198102		TERT	-1377		CCDC88A	0.000595921		E2F8	1.99513e-16
ZBTB47	1		ZBTB47	0		EFHD2	0.198102		SIGLEC7	-1377		PKIG	0.000595921		CCDC186	1.98435e-16
CPNE8	1		CPNE8	0		IFNAR1	0.197875		RRM2B	-1377		DUSP1	0.000589793		ZNF687	1.95559e-16
PTAFR	1		PTAFR	0		BTN3A3	0.197875		GUCY1A3	-1377		KCNQ1	0.000589145		PTMS	1.9436e-16
ROBO3	1		ROBO3	0		FAM109A	0.197818		GRAMD3	-1377		DUSP3	0.000586837		GTF3C3	1.94121e-16
MVB12B	1		MVB12B	0		COMMD4	0.197676		CDAN1	-1377		MBD2	0.000578959		MRAS	1.93761e-16
ZCCHC7	1		ZCCHC7	0		UBE2T	0.197619		PPT1	-1377		TLR7	0.000576391		OTUD1	1.90047e-16
AP4M1	1		AP4M1	0		RHPN1	0.197393		LRRC74A	-1377		C1QB	0.00057478		NPM3	1.89567e-16
CDC42EP4	1		CDC42EP4	0		TCEAL1	0.197308		PTGFRN	-1377		C1QC	0.00057478		ZNF264	1.88459e-16
C2	1		C2	0		MRAS	0.197252		SLC4A4	-1377		TLR8	0.00057366		D2HGDH	1.8741e-16
GOLGA3	1		GOLGA3	0		TOPORS	0.197167		TRIM36	-1377		IGHD	0.000572854		CLEC4F	1.87171e-16
PHPT1	1		PHPT1	0		SPTB	0.197167		MS4A7	-1377		METTL18	0.000566547		CD93	1.86691e-16
SLAMF7	1		SLAMF7	0		KCNQ1	0.196857		TAP2	-1377		SCN5A	0.000563671		INTS3	1.86691e-16
POLB	1		POLB	0		SPDL1	0.196745		KCTD15	-1377		TREM1	0.000556552		AGPAT2	1.85613e-16
TRIOBP	1		TRIOBP	0		S100A10	0.196689		CDIP1	-1377		IL13RA1	0.000555507		APOC2	1.85493e-16
TERT	1		TERT	0		OSBPL1A	0.196576		MPPED1	-1377		LRRC74A	0.000555056		MARCKS	1.85493e-16
SIGLEC7	1		SIGLEC7	0		EBF1	0.196576		PTPRE	-1377		PTGFRN	0.000555056		SAMD1	1.85254e-16
RRM2B	1		RRM2B	0		GAS6	0.19652		PDGFC	-1377		KLF3	0.000553473		HERC5	1.84415e-16
GUCY1A3	1		GUCY1A3	0		LAX1	0.196185		MTMR10	-1377		E2F8	0.000553473		CDS2	1.83456e-16
GRAMD3	1		GRAMD3	0		ASAP1	0.196129		ZNF703	-1377		HYAL2	0.000553473		OSBPL1A	1.83037e-16
CDAN1	1		CDAN1	0		RIN1	0.196129		PRRG4	-1377		FAM46C	0.000550959		SETX	1.82917e-16
PPT1	1		PPT1	0		ZBP1	0.195711		PALLD	-1377		TCEAL1	0.000545264		TRRAP	1.82857e-16
LRRC74A	1		LRRC74A	0		USPL1	0.1956		TMEM37	-1377		SLC7A5	0.000542931		PRAF2	1.82617e-16
PTGFRN	1		PTGFRN	0		MEF2A	0.1956		LRCH4	-1377		SLC39A14	0.000542931		HIST2H2AA3	1.81179e-16
SLC4A4	1		SLC4A4	0		SKAP2	0.195572		HLA-DPB1	-1377		CHP1	0.000542931		PFKFB2	1.8046e-16
TRIM36	1		TRIM36	0		IKZF2	0.195544		RCOR2	-1377		CDS2	0.000542931		RTN1	1.79622e-16
MS4A7	1		MS4A7	0		HOXB5	0.195544		PAXBP1	-1377		MRAS	0.000542496		ERCC6L2	1.79262e-16
TAP2	1		TAP2	0		IL32	0.195489		ATG2B	-1377		STK11IP	0.000537379		TRIM36	1.79262e-16
KCTD15	1		KCTD15	0		CDX1	0.195489		AKAP8L	-1377		LY86	0.000537379		R3HDM2	1.76626e-16
CDIP1	1		CDIP1	0		TLR7	0.195406		DHX37	-1377		ITGAM	0.000535313		CTU2	1.75547e-16
MPPED1	1		MPPED1	0		EID3	0.195406		ZNF804A	-1377		MEF2BNB	0.000534943		IKZF2	1.74469e-16
PTPRE	1		PTPRE	0		ITGAM	0.195378		BMF	-1377		EAF2	0.000527408		CDIP1	1.74229e-16
PDGFC	1		PDGFC	0		TLR8	0.195378		OTUD1	-1377		KIF13B	0.000526081		NPL	1.7387e-16
MTMR10	1		MTMR10	0		PSD	0.19535		OVGP1	-1377		ARIH1	0.000520802		BAMBI	1.72552e-16
ZNF703	1		ZNF703	0		EAF2	0.195322		YME1L1	-1377		NCKAP5	0.000520802		CDX1	1.72072e-16
PRRG4	1		PRRG4	0		DTNA	0.195018		ZSCAN26	-1377		MARCH7	0.000520802		NLRP7	1.71893e-16
PALLD	1		PALLD	0		DAG1	0.194963		SNX8	-1377		FUCA1	0.000520802		PPT1	1.71593e-16
TMEM37	1		TMEM37	0		RAB31	0.194798		NCKAP5	-1377		FAIM	0.000517534		DHX37	1.71354e-16
LRCH4	1		LRCH4	0		MALSU1	0.194578		GGT1	-1377		SPDL1	0.000514886		GMDS	1.71234e-16
HLA-DPB1	1		HLA-DPB1	0		SLC7A5	0.194495		ARSA	-1377		ADH1B	0.000510466		HYAL2	1.69916e-16
RCOR2	1		RCOR2	0		SLC39A14	0.194495		RPRD1A	-1377		CDCA5	0.000510466		BMF	1.69436e-16
PAXBP1	1		PAXBP1	0		CHP1	0.194495		TLN2	-1377		RAB13	0.000509864		SCN5A	1.69436e-16
ATG2B	1		ATG2B	0		CDS2	0.194495		BTN3A3	-1377		LAX1	0.000500663		IFNAR1	1.68328e-16
AKAP8L	1		AKAP8L	0		PTMS	0.194413		WDR20	-1377		PTPRE	0.000496274		STIL	1.6656e-16
DHX37	1		DHX37	0		RAB6A	0.194194		TRAK1	-1377		PDGFC	0.000496274		MEF2A	1.66021e-16
ZNF804A	1		ZNF804A	0		OVGP1	0.194085		BATF	-1377		USPL1	0.000495596		ALDH7A1	1.65602e-16
BMF	1		BMF	0		TREM1	0.19373		TTC37	-1377		MEF2A	0.000495596		SPOCD1	1.65602e-16
OTUD1	1		OTUD1	0		MBD2	0.193214		PKIA	-1377		CPEB4	0.000489937		ZCCHC11	1.63834e-16
OVGP1	1		OVGP1	0		IL17RA	0.19316		RAVER1	-1377		CPEB3	0.000489937		IL23A	1.63774e-16
YME1L1	1		YME1L1	0		EDA	0.19297		SCML1	-1377		RAVER1	0.000489937		ZMIZ2	1.62966e-16
ZSCAN26	1		ZSCAN26	0		PPT1	0.19297		BAMBI	-1377		S100A10	0.000486494		MAP2K6	1.61767e-16
SNX8	1		SNX8	0		AGPAT2	0.192943		ETV7	-1377		ZBP1	0.000482193		ATG2B	1.61048e-16
NCKAP5	1		NCKAP5	0		PTPRE	0.192862		PTMS	-1377		GSTCD	0.000464469		CDCA5	1.60569e-16
GGT1	1		GGT1	0		PDGFC	0.192862		VIMP	-1377		OSBPL1A	0.000451326		PDGFC	1.60329e-16
RPRD1A	1		RPRD1A	0		ARIH1	0.192593		ALDH7A1	-1377		EBF1	0.000451326		HLA-DPB1	1.5961e-16
TLN2	1		TLN2	0		NCKAP5	0.192593		PPP3CA	-1377		PSD	0.00042878		LAX1	1.59131e-16
BTN3A3	1		BTN3A3	0		MARCH7	0.192593		DTX1	-1377		SKAP2	0.000413913		WHSC1	1.57993e-16
WDR20	1		WDR20	0		FUCA1	0.192593		D2HGDH	-1377		TOPORS	0.000404836		DRP2	1.57693e-16
TTC37	1		TTC37	0		GNA12	0.192458		GLI1	-1377		MALSU1	0.00040396		ZNF804A	1.57214e-16
PKIA	1		PKIA	0		HTRA1	0.192431		GLRA2	-1377		AGPAT2	0.000401195		KCTD15	1.56974e-16
RAVER1	1		RAVER1	0		STK11IP	0.191922		ARHGAP33	-1377		AK9	0.000391666		POLB	1.56735e-16
SCML1	1		SCML1	0		LY86	0.191922		VWF	-1377		IL17RA	0.00038329		ARSA	1.56495e-16
BAMBI	1		BAMBI	0		ADH1B	0.191815		ARHGAP15	-1377		GAS6	0.000380029		ELP4	1.55776e-16
ETV7	1		ETV7	0		CDCA5	0.191815		CYP27A1	-1377		RAB31	0.000378995		HOXB5	1.55177e-16
PTMS	1		PTMS	0		ZCCHC11	0.1907		SCRN1	-1377		RNF144B	0.000377582		ARAP1	1.55117e-16
DTX1	1		DTX1	0		FAM46C	0.1907		MBD2	-1377		TAF12	0.000373982		AKAP8L	1.53859e-16
D2HGDH	1		D2HGDH	0		LTK	0.19041		SHROOM1	-1377		RAB6A	0.000371339		C2	1.51582e-16
GLRA2	1		GLRA2	0		SLC22A6	0.190253		SPIRE1	-1377		IKZF2	0.000369851		ELK1	1.51103e-16
ARHGAP33	1		ARHGAP33	0		GCSAM	0.190253		COMMD4	-1377		HOXB5	0.000369851		PKIG	1.51103e-16
VWF	1		VWF	0		WDR24	0.190253		UBE2S	-1377		PTMS	0.000362932		ATAD3C	1.50743e-16
ARHGAP15	1		ARHGAP15	0		SYNRG	0.190253		CCNY	-1377		KIF13A	0.00035491		GRIN1	1.50504e-16
CYP27A1	1		CYP27A1	0		SPARC	0.190174		CD93	-1377		PCDH1	0.00035491		ACPP	1.50384e-16
SCRN1	1		SCRN1	0		TYROBP	0.190095		BSG	-1377		LAMA5	0.00035491		PAXBP1	1.49545e-16
MBD2	1		MBD2	0		NNT	0.189912		CDK15	-1377		ASAP1	0.000353225		CCDC69	1.49305e-16
SHROOM1	1		SHROOM1	0		EPHX2	0.189912		MARCH7	-1377		VSIG4	0.000352341		DALRD3	1.49066e-16
SPIRE1	1		SPIRE1	0		TAF12	0.189859		FUCA1	-1377		EID3	0.000346958		CHP1	1.48347e-16
COMMD4	1		COMMD4	0		SNAPC3	0.18965		FER	-1377		PSAT1	0.000337258		UACA	1.48227e-16
UBE2S	1		UBE2S	0		KIF13A	0.189598		SH3BP1	-1377		NNT	0.000327871		PHPT1	1.47867e-16
CD93	1		CD93	0		PCDH1	0.189598		MAP2K6	-1377		EPHX2	0.000327871		MVB12B	1.47268e-16
BSG	1		BSG	0		LAMA5	0.189598		MYH11	-1377		RHPN1	0.000326697		HK1	1.46909e-16
CDK15	1		CDK15	0		GSTCD	0.189416		PAX5	-1377		NAMPT	0.000324804		PDIA4	1.45591e-16
MARCH7	1		MARCH7	0		IGHD	0.18939		CDH15	-1377		ZCCHC11	0.000320526		GNB4	1.44272e-16
FUCA1	1		FUCA1	0		RNF144B	0.18926		B3GNTL1	-1377		OVGP1	0.000320341		PLA2G7	1.43314e-16
FER	1		FER	0		CPEB4	0.189156		DBF4B	-1377		GNA12	0.000309024		STK40	1.43194e-16
SH3BP1	1		SH3BP1	0		CPEB3	0.189156		KIF3B	-1377		RIN1	0.000304611		DLGAP1	1.41756e-16
MAP2K6	1		MAP2K6	0		RAVER1	0.189156		XPO7	-1377		LTK	0.000299384		PIK3CD	1.39959e-16
MYH11	1		MYH11	0		PSAT1	0.189		DAG1	-1377		STK40	0.000297396		MPPED1	1.39959e-16
CDH15	1		CDH15	0		LRRC74A	0.18869		ODF3L2	-1377		ADAM8	0.000287502		NIN	1.3924e-16
B3GNTL1	1		B3GNTL1	0		PTGFRN	0.18869		ZMIZ2	-1377		SNAPC3	0.000275097		LANCL1	1.3924e-16
DBF4B	1		DBF4B	0		ARAP1	0.188612		DALRD3	-1377		TSTA3	0.000271625		LRCH4	1.3876e-16
KIF3B	1		KIF3B	0		IL13RA1	0.18856		CDCA2	-1377		TYROBP	0.000269118		ROBO3	1.38281e-16
XPO7	1		XPO7	0		TBX4	0.188509		PLEKHA4	-1377		SPARC	0.00026871		RCOR2	1.38041e-16
ODF3L2	1		ODF3L2	0		CD93	0.188509		CDCA5	-1377		FER	0.000264152		PTPRE	1.36364e-16
ZMIZ2	1		ZMIZ2	0		INHBA	0.188329		GNB4	-1377		PRAF2	0.000262046		SPON1	1.35885e-16
DALRD3	1		DALRD3	0		ACVR2A	0.188329		PLA2G7	-1377		UNC5B	0.000259998		SDPR	1.33488e-16
CDCA2	1		CDCA2	0		VSIG4	0.187943		ATAD3C	-1377		PHF8	0.000258384		PCDH1	1.33248e-16
PLEKHA4	1		PLEKHA4	0		TSTA3	0.187738		LANCL1	-1377		MCPH1	0.000257632		TMEM37	1.3229e-16
CDCA5	1		CDCA5	0		MCPH1	0.187585		ACAA1	-1377		RPP25	0.000256487		SLC39A14	1.31571e-16
GNB4	1		GNB4	0		PLAU	0.187508		AK9	-1377		RNF113A	0.000250413		MBD2	1.31331e-16
PLA2G7	1		PLA2G7	0		PRTFDC1	0.186873		CREB3L2	-1377		TRIM47	0.000250413		MCPH1	1.30972e-16
ATAD3C	1		ATAD3C	0		TSACC	0.186873		LAX1	-1377		INHBA	0.000250015		PALLD	1.30612e-16
LANCL1	1		LANCL1	0		ELL2	0.186746		GTF3C3	-1377		ACVR2A	0.000250015		B3GNTL1	1.30612e-16
ACAA1	1		ACAA1	0		PHF8	0.186746		TRRAP	-1377		APOC2	0.000246392		CYP2C9	1.30492e-16
AK9	1		AK9	0		SH3BP1	0.186696		ZNF687	-1377		URM1	0.000245732		MIIP	1.28216e-16
CREB3L2	1		CREB3L2	0		APOC2	0.18667		NPM3	-1377		TRAK1	0.000244484		CST3	1.27976e-16
LAX1	1		LAX1	0		NAMPT	0.186418		INTS3	-1377		PLAU	0.000239606		KCTD20	1.27497e-16
GTF3C3	1		GTF3C3	0		IFNGR2	0.186393		PDK1	-1377		VIMP	0.000238632		CHCHD6	1.26298e-16
TRRAP	1		TRRAP	0		FER	0.186367		PLXNB2	-1377		HID1	0.000236599		FARP1	1.26059e-16
ZNF687	1		ZNF687	0		EPAS1	0.186216		ARHGAP18	-1377		PRTFDC1	0.000229583		FSTL3	1.24501e-16
NPM3	1		NPM3	0		RNF113A	0.186191		DUSP9	-1377		TSACC	0.000229583		TAP2	1.24381e-16
INTS3	1		INTS3	0		TRIM47	0.186191		COA1	-1377		HTRA1	0.000229108		TCEAL4	1.21865e-16
PDK1	1		PDK1	0		STK40	0.18604		IGLC1	-1377		STEAP3	0.000227085		SLC7A5	1.18749e-16
PLXNB2	1		PLXNB2	0		URM1	0.18524		IGJ	-1377		IFNGR2	0.000222446		PPP2R5B	1.16233e-16
ARHGAP18	1		ARHGAP18	0		HID1	0.18519		ARF4	-1377		FCN1	0.00022174		APOL1	1.11829e-16
DUSP9	1		DUSP9	0		TRAK1	0.18519		ASRGL1	-1377		AP4M1	0.000219833		CCDC88A	1.1156e-16
COA1	1		COA1	0		FCN1	0.184991		SLC50A1	-1377		PDIA4	0.000215928		IQGAP3	1.10002e-16
IGLC1	1		IGLC1	0		TRIM17	0.184991		KIFC2	-1377		EPAS1	0.000195252		FZD8	1.10002e-16
IGJ	1		IGJ	0		RPP25	0.184669		SDPR	-1377		SH3BP1	0.000195009		CPSF2	1.09313e-16
ARF4	1		ARF4	0		STEAP3	0.184521		ICAM4	-1377		MAP2K6	0.00018724		AGRN	1.09283e-16
ASRGL1	1		ASRGL1	0		AK9	0.183758		PLXND1	-1377		IMPA2	0.00018194		MSR1	1.08804e-16
SLC50A1	1		SLC50A1	0		CACNA1I	0.183586		ARHGEF10L	-1377		ZSCAN26	0.000181		S100A10	1.07366e-16
KIFC2	1		KIFC2	0		PRAF2	0.182541		IGFBP7	-1377		TBX4	0.000179115		ASPH	1.06886e-16
SDPR	1		SDPR	0		DIS3	0.182444		TMEM57	-1377		CD93	0.000179115		SPDL1	1.06886e-16
ICAM4	1		ICAM4	0		FOXN3	0.182444		TPCN1	-1377		SLC22A6	0.000175889		CDCA2	1.05688e-16
PLXND1	1		PLXND1	0		P4HA1	0.181626		SPOCD1	-1377		GCSAM	0.000175889		MPZL2	1.04969e-16
ARHGEF10L	1		ARHGEF10L	0		ADAM8	0.18134		FURIN	-1377		WDR24	0.000175889		GLI1	1.04729e-16
IGFBP7	1		IGFBP7	0		UNC5B	0.18134		STX12	-1377		SYNRG	0.000175889		MAFB	1.0461e-16
TMEM57	1		TMEM57	0		MAP2K6	0.181244		CARD10	-1377		UACA	0.000172385		VSTM2L	1.0401e-16
TPCN1	1		TPCN1	0		IMPA2	0.180816		AVPI1	-1377		C2	0.000172378		LAMA5	1.03052e-16
SPOCD1	1		SPOCD1	0		CD244	0.180721		KCNQ1	-1377		IGFBP7	0.000172004		IGFBP7	1.02093e-16
FURIN	1		FURIN	0		VIMP	0.180698		BACE1	-1377		DIS3	0.000169943		UNC5B	9.5263e-17
CARD10	1		CARD10	0		AP4M1	0.180698		PFKFB2	-1377		FOXN3	0.000169943		GRAMD1A	9.32259e-17
AVPI1	1		AVPI1	0		LAT2	0.179943		SCN5A	-1377		ELL2	0.000169741		AK9	9.29863e-17
KCNQ1	1		KCNQ1	0		MZT1	0.179778		VPS4A	-1377		CD244	0.000166292		MS4A7	9.25069e-17
BACE1	1		BACE1	0		C2	0.179731		AAMDC	-1377		LAT2	0.000166095		PRRG4	8.96311e-17
PFKFB2	1		PFKFB2	0		CDCA2	0.179194		APOC2	-1377		CACNA1I	0.000162677		P4HA1	8.72345e-17
SCN5A	1		SCN5A	0		IGFBP7	0.179147		GSTO1	-1377		ZBTB47	0.000162167		HIST1H2BD	8.69949e-17
VPS4A	1		VPS4A	0		CCDC91	0.179031		STON2	-1377		HK1	0.000153179		CD300LB	8.6201e-17
APOC2	1		APOC2	0		ZBTB47	0.178984		STOM	-1377		CCDC91	0.00015254		C7orf26	8.29207e-17
GSTO1	1		GSTO1	0		HK1	0.178845		FERMT3	-1377		TRIM17	0.000150066		VWA9	7.86069e-17
STON2	1		STON2	0		VAMP7	0.178822		COPE	-1377		CTTNBP2NL	0.000144651		NOL9	7.60306e-17
STOM	1		STOM	0		ZSCAN26	0.178659		BMP2K	-1377		CDCA2	0.000139458		CCDC86	7.43531e-17
FERMT3	1		FERMT3	0		ZMIZ2	0.178613		CST3	-1377		MS4A7	0.000136919		GGT1	7.33345e-17
COPE	1		COPE	0		UACA	0.177806		PCDH1	-1377		PIK3CD	0.000132543		PROC	7.28552e-17
BMP2K	1		BMP2K	0		CSF1R	0.1776		PIP5K1B	-1377		MZT1	0.000125019		LRMP	7.15296e-17
CST3	1		CST3	0		DTX1	0.176667		MTFR2	-1377		P4HA1	0.000122389		RASAL3	7.09455e-17
PCDH1	1		PCDH1	0		MYOG	0.176531		FANCG	-1377		ZMIZ2	0.000121784		URB1	6.80621e-17
PIP5K1B	1		PIP5K1B	0		BSG	0.175945		HIST2H2AA3	-1377		DTX1	0.000110453		PAPD5	6.66841e-17
FANCG	1		FANCG	0		CXCL12	0.175743		SAMD1	-1377		MPP3	0.000107465		PDK2	6.03931e-17
HIST2H2AA3	1		HIST2H2AA3	0		PDIA4	0.175073		CCDC91	-1377		MYOG	0.000104771		TGFBI	6.01535e-17
SAMD1	1		SAMD1	0		MPP3	0.174917		GNG5	-1377		BSG	0.000100691		ZNF839	4.28384e-17
CCDC91	1		CCDC91	0		ZNF277	0.174563		TIMM17A	-1377		PPP3CA	0.000100136		YTHDF1	4.22655e-17
GNG5	1		GNG5	0		CYP2C9	0.174364		STK11IP	-1377		ZNF277	9.72483e-05		IL32	3.98577e-17
TIMM17A	1		TIMM17A	0		MPZL2	0.17432		E2F5	-1377		NCAPG	9.69662e-05		PALD1	3.78655e-17
STK11IP	1		STK11IP	0		PIK3CD	0.173661		AGRN	-1377		VAMP7	9.60694e-05		ZC3H12C	3.58023e-17
E2F5	1		E2F5	0		NIN	0.173442		CCL16	-1377		CSF1R	9.4538e-05		PLXDC2	3.37914e-17
AGRN	1		AGRN	0		KCNIP3	0.171906		GRAMD1A	-1377		NIN	9.02451e-05		IL13RA1	3.01966e-17
GRAMD1A	1		GRAMD1A	0		ADPRHL2	0.171521		P4HA1	-1377		MPZL2	8.85342e-05		SELL	1.12638e-17
P4HA1	1		P4HA1	0		CTTNBP2NL	0.171265		FKBP6	-1377		PPP2R5B	8.21278e-05		IDE	8.62759e-18
FKBP6	1		FKBP6	0		MS4A7	0.171031		IQGAP3	-1377		ADPRHL2	7.75078e-05		CITED2	2.39655e-19
IQGAP3	1		IQGAP3	0		PPP2R5B	0.170968		MSR1	-1377		CXCL12	7.67186e-05		ZNF277	2.39655e-19
MSR1	1		MSR1	0		FKBP6	0.170608		ASPH	-1377		CYP2C9	7.63701e-05		ZBTB47	2.39655e-19
ASPH	1		ASPH	0		STAP1	0.170608		SSR2	-1377		PAX5	7.59053e-05		KIF13A	2.99569e-20
SSR2	1		SSR2	0		SNX8	0.170144		CCDC186	-1377		DLGAP1	7.47549e-05		NFE2L2	2.99569e-20
CCDC186	1		CCDC186	0		IL23A	0.169537		DSC2	-1377		GRIN1	7.47549e-05		KLHL5	0
DSC2	1		DSC2	0		WDR20	0.169537		WBP2	-1377		FKBP6	7.21065e-05		KLF3	0
WBP2	1		WBP2	0		NCAPG	0.169267		PLOD1	-1377		STAP1	7.21065e-05		USPL1	0
PLOD1	1		PLOD1	0		APBB3	0.169121		SERPINB13	-1377		TRIM52	6.46131e-05		RGS12	0
SERPINB13	1		SERPINB13	0		SPON1	0.169121		FAM91A1	-1377		SNX8	6.12618e-05		RFXAP	0
FAM91A1	1		FAM91A1	0		SUFU	0.169038		APOBEC3B	-1377		APBB3	6.10187e-05		KDM8	0
APOBEC3B	1		APOBEC3B	0		DLGAP1	0.169038		RPL10L	-1377		SPON1	6.10187e-05		GNA12	0
RPL10L	1		RPL10L	0		GRIN1	0.169038		NUPL2	-1377		UBE2S	6.04235e-05		FAM3C	0
NUPL2	1		NUPL2	0		PAX5	0.168501		S100A10	-1377		KDM8	5.74622e-05		ENTPD4	0
S100A10	1		S100A10	0		B3GALT4	0.168254		C7orf26	-1377		KCNIP3	5.69706e-05		IMPA2	0
C7orf26	1		C7orf26	0		CCL8	0.168233		VWA9	-1377		SUFU	5.29082e-05		NUSAP1	0
VWA9	1		VWA9	0		TRIM52	0.16811		HIST1H2BD	-1377		DRP2	5.28738e-05		CSTA	0
HIST1H2BD	1		HIST1H2BD	0		UBE2S	0.167926		CCDC69	-1377		IL23A	5.09396e-05		NRP1	0
CCDC69	1		CCDC69	0		CCL4	0.167865		HEY1	-1377		WDR20	5.09396e-05		SLC39A7	0
HEY1	1		HEY1	0		PPP3CA	0.167865		SERTAD3	-1377		NRP1	4.83166e-05		TAF12	0
SERTAD3	1		SERTAD3	0		CCL16	0.167824		HELB	-1377		PRRG4	4.83166e-05		KBTBD4	0
HELB	1		HELB	0		THBD	0.167538		PDK2	-1377		OSM	4.50918e-05		SPTB	0
PDK2	1		PDK2	0		NRP1	0.166224		STAP1	-1377		LIF	4.50918e-05		CTTNBP2NL	0
STAP1	1		STAP1	0		PRRG4	0.166224		ELAVL3	-1377		CCL8	4.42779e-05		SEC11A	0
ELAVL3	1		ELAVL3	0		OSM	0.165824		GUSB	-1377		CCL4	4.38834e-05		ADPRHL2	0
GUSB	1		GUSB	0		LIF	0.165824		RPP25	-1377		CCL16	4.36607e-05		CUX1	0
RPP25	1		RPP25	0		KDM8	0.165406		ZNF185	-1377		THBD	4.32109e-05		IKBIP	0
ZNF185	1		ZNF185	0		TCEAL4	0.164813		GFPT1	-1377		GRAMD1A	4.10639e-05		TRIM52	0
GFPT1	1		GFPT1	0		SETX	0.164714		MARVELD2	-1377		B3GALT4	4.03626e-05		CEP78	0
MARVELD2	1		MARVELD2	0		PLXDC2	0.163697		TTC7A	-1377		TCEAL4	3.88463e-05		STEAP3	0
TTC7A	1		TTC7A	0		PALD1	0.163697		STT3B	-1377		TGFBI	3.81374e-05		PCBD2	0
STT3B	1		STT3B	0		GRAMD1A	0.163483		TGFBI	-1377		PLXDC2	3.4353e-05		SKAP2	0
TGFBI	1		TGFBI	0		TGFBI	0.163464		NCAPG	-1377		PALD1	3.4353e-05		PER3	0
NCAPG	1		NCAPG	0		GLRA2	0.163444		FARP1	-1377		GLRA2	3.05477e-05		RAB6A	0
FARP1	1		FARP1	0		DRP2	0.163212		CHCHD6	-1377		SETX	2.88418e-05		APBB3	0
CHCHD6	1		CHCHD6	0		CD300LB	0.15975		KCTD20	-1377		PDK2	2.51019e-05		ZNF446	0
KCTD20	1		KCTD20	0		PDK2	0.158227		MIIP	-1377		GGT1	2.31401e-05		FAM192A	0
MIIP	1		MIIP	0		RIOK2	0.158118		LAMA5	-1377		FSTL3	2.04825e-05		GSTCD	0
LAMA5	1		LAMA5	0		GGT1	0.157144		FZD8	-1377		RIOK2	1.94502e-05		FAM109A	0
FZD8	1		FZD8	0		PDK1	0.157001		PROC	-1377		CD300LB	1.91728e-05		MZT1	0
PROC	1		PROC	0		CTU2	0.156307		PWWP2B	-1377		CTU2	1.75067e-05		GAS6	0
IL13RA1	1		IL13RA1	0		VCAN	0.155233		IL13RA1	-1377		PDK1	1.39103e-05		CDAN1	0
SLC15A3	1		SLC15A3	0		FSTL3	0.153521		SLC15A3	-1377		VCAN	8.66415e-06		RPRD1A	0
LY86	1		LY86	0		IKBIP	0.15006		LY86	-1377		KBTBD4	7.65614e-06		GLRA2	0
SFXN1	1		SFXN1	0		YME1L1	0.15006		SFXN1	-1377		TMEM37	7.65614e-06		AREG	-9.36153e-22
VSTM2L	1		VSTM2L	0		KBTBD4	0.148892		VSTM2L	-1377		B3GNTL1	7.65614e-06		ARG2	-7.48923e-21
IDE	1		IDE	0		TMEM37	0.148892		IDE	-1377		IKBIP	7.46424e-06		CD244	-1.49785e-20
SELL	1		SELL	0		B3GNTL1	0.148892		SELL	-1377		YME1L1	7.46424e-06		IPO9	-5.99138e-20
MARCKS	1		MARCKS	0		CACNA1H	0.146705		MARCKS	-1377		CACNA1H	4.05877e-06		RNF113A	-5.99138e-20
RRM2	1		RRM2	0		GLI1	0.144611		RRM2	-1377		ZNF446	3.76935e-06		IL17RA	-5.99138e-20
SPDL1	1		SPDL1	0		ZNF446	0.144611		SPDL1	-1377		GLI1	3.76935e-06		PRTFDC1	-5.99138e-20
HK3	1		HK3	0		IDE	0.143751		HK3	-1377		IDE	3.12639e-06		CACNA1H	-1.19828e-19
MPZL2	1		MPZL2	0		RPRD1A	0.136544		MPZL2	-1377		RPRD1A	1.38569e-06		PTTG1IP	-1.19828e-19
PPARD	1		PPARD	0		SELL	0.134387		PPARD	-1377		SELL	6.17261e-07		RAD51B	-2.39655e-19
