# Supplementary material for: Network-based analysis of differentially expressed genes in cerebrospinal fluid (CSF) and blood reveals new candidate genes for multiple sclerosis
Source: PeerJ. 2016 Dec 22;4:e2775. doi: 10.7717/peerj.2775 (PMC5183126; doi:10.7717/peerj.2775)
Supplement: Supplemental Information 4 [file peerj-04-2775-s004.xlsx]

## Sheet: Sheet1
Column1	Column2	Column3	Column4	Column5	Column6	Column7	Column8	Column9	Column10	Column11	Column12	Column13	Column14	Column15	Column16	Column17
NODE	Degree		NODE	BetweennessCentrality		NODE	ClosenessCentrality		NODE	CentroidValue		NODE	EigenVector		NODE	current flow Betweenness
MYC	64		MYC	0.230795		HSP90AB1	0.37415		HSP90AB1	55		IKBKE	0.350114		MYC	0.268936
IKBKE	52		HSP90AB1	0.171901		IKBKE	0.357433		IKBKE	-55		MYC	0.321872		HSP90AB1	0.178845
HSP90AB1	49		IKBKE	0.147869		MYC	0.355699		MYC	-66		HSP90AB1	0.287978		IKBKE	0.177693
HLA-B	34		HLA-B	0.101858		CTNNB1	0.351438		CTNNB1	-76		HLA-B	0.190908		HLA-B	0.155486
NOTCH2NL	31		FYN	0.0927965		CDC37	0.34375		RUVBL1	-86		CDC37	0.159831		CDC37	0.114415
CDC37	28		CDC37	0.0853524		RUVBL1	0.338462		PSMA1	-99		MAP3K3	0.156652		FYN	0.110113
ILK	27		PSMA1	0.0780724		PSMA1	0.333586		CDC37	-104		CTNNB1	0.152822		ILK	0.0985528
FYN	24		CTNNB1	0.0750521		FYN	0.329095		LRPPRC	-109		ILK	0.145269		NOTCH2NL	0.0959955
CTNNB1	23		NOTCH2NL	0.0689119		LRPPRC	0.328849		CALM1	-114		PSMA7	0.138022		CTNNB1	0.0944974
ISG15	23		ILK	0.0631462		CALM1	0.327869		PSMA7	-122		RUVBL1	0.136956		PSMA1	0.0816322
MAP3K3	22		DAXX	0.0507874		PSMA7	0.325203		PSMB3	-141		PSMA1	0.12993		ISG15	0.0815336
CASP8	19		CASP8	0.0484784		HLA-B	0.324723		HLA-B	-155		PSMB3	0.127958		UBQLN4	0.0796861
ACTB	19		UBQLN4	0.0458444		ILK	0.321168		CCT5	-159		CALM1	0.120923		MAP3K3	0.0772135
FASLG	18		ACTB	0.0454545		PSMB3	0.3207		FYN	-161		ACTB	0.118307		ACTB	0.0743888
PSMA1	18		ISG15	0.0432425		MAP3K5	0.319303		IFIT3	-165		ISG15	0.117155		CD247	0.0727865
CDK2	18		CD247	0.0426501		ISG15	0.318841		HNRNPM	-171		CCT5	0.11412		CDK2	0.07214
CD247	17		CDK2	0.038393		ACTB	0.31861		PSMA2	-181		PSMA2	0.110989		DAXX	0.0704168
H2AFX	16		MAP3K3	0.0381854		SF3B3	0.317919		FAS	-184		CDK2	0.107062		CASP8	0.0671739
IL7R	16		FASLG	0.0347118		CCT5	0.317919		ILK	-194		LRPPRC	0.105956		RNPS1	0.0655828
CDKN1A	16		H2AFX	0.0338421		HNRNPM	0.317003		CCT8	-195		IFIT3	0.102157		H2AFX	0.0649788
IFIT3	15		RNPS1	0.0331689		UNC45A	0.316775		PSMD3	-200		PABPC1	0.100779		CDKN1A	0.0588325
DAXX	14		TSG101	0.0326368		IFIT3	0.316547		MAP3K5	-202		CCT8	0.0986738		CREB3	0.0545107
UBQLN4	14		PSMA7	0.0323831		CDK2	0.315865		ISG15	-204		H2AFX	0.0944826		USP7	0.0540919
FAS	14		MAGED1	0.0302492		MAP3K3	0.315865		ACTB	-205		HNRNPM	0.0932501		FASLG	0.0539644
PPP2R2B	13		JUN	0.0299818		HSPH1	0.3125		XRCC5	-207		FYN	0.0927657		IL7R	0.0522275
CASP3	13		CREB3	0.0296751		PSMA2	0.311615		SP1	-208		SPTAN1	0.0922554		MAGED1	0.050113
PSMA7	13		SP1	0.0294375		CCT8	0.308555		JUN	-208		PSMD3	0.0914298		SP1	0.0485457
USP7	12		FAS	0.0291968		FAS	0.308339		SF3B3	-208		CD247	0.0905288		PSMA7	0.0475245
PABPC1	11		LRPPRC	0.0285362		PSMD3	0.307477		MZT2B	-209		EIF3M	0.0888788		IFIT3	0.0468772
MRFAP1L1	11		USP7	0.0283948		PARP1	0.305981		UNC45A	-213		TAGLN2	0.0869875		FAS	0.0459355
CREB3	11		CDKN1A	0.0274545		EIF3M	0.305768		PARP1	-216		PSMD4	0.0866423		CASP3	0.0453529
SP1	11		IFIT3	0.0265916		MZT2B	0.305556		MAP3K3	-217		MYH9	0.085979		HAUS1	0.0420366
MAGED1	11		RUVBL1	0.0249088		STAT1	0.305132		CDK2	-217		UNC45A	0.0854095		JUN	0.041707
STAT1	11		STAT1	0.0239668		SPTAN1	0.305132		PABPC1	-220		STAT1	0.0832745		BABAM1	0.0414412
HAUS1	11		IL7R	0.0231992		JUN	0.30492		RNPS1	-224		PPP2R2B	0.0831381		TSG101	0.0404988
CALM1	10		BABAM1	0.0222176		XRCC5	0.304709		ATF7IP	-226		PARP1	0.0828773		STAT1	0.0404209
RNPS1	10		CALM1	0.0219833		SP1	0.304498		NOTCH2NL	-231		MZT2B	0.081248		PPP2R2B	0.0400268
JUN	10		MAP3K5	0.0206671		CD247	0.304288		PSMD4	-231		IRF3	0.0799476		SUV39H1	0.0379909
IFIT1	10		CASP3	0.0206283		IRF3	0.303867		HSPH1	-232		TUBB	0.0789862		IRF3	0.0371603
TSG101	10		IRF3	0.0201794		PABPC1	0.303239		GANAB	-234		HNRNPH1	0.0758113		PFDN1	0.0369979
PSMB3	10		UPF1	0.019635		ZC3H7B	0.302613		TUBB6	-235		DDX58	0.0750792		UPF1	0.0366128
RUVBL1	10		SUV39H1	0.0195259		IL7R	0.299728		TAGLN2	-239		EIF3D	0.0734472		PABPC1	0.0366034
BABAM1	9		MCM6	0.0195222		PSMD4	0.299728		IL7R	-239		SF3B3	0.0733273		MCRS1	0.0354719
GZMB	9		PABPC1	0.0186321		MYH9	0.29932		H2AFX	-245		XRCC5	0.0722836		RUVBL1	0.0346231
PSMA2	9		FLOT1	0.018472		TAGLN2	0.29932		TUBB	-246		HSPH1	0.0714936		CALM1	0.0342365
IFIT2	9		ATP5C1	0.0180265		GANAB	0.299116		RAD23A	-246		IL7R	0.0709815		USP11	0.0333889
IRF3	9		PFDN1	0.0179968		TUBB6	0.298913		CASP3	-248		GANAB	0.0676235		GZMB	0.0320131
PARP1	9		LAT	0.0176933		TUBB	0.297901		CDKN1A	-251		JUN	0.0669484		LRPPRC	0.0318827
PSMD4	8		HAUS1	0.0174645		PRPF19	0.2977		UBQLN4	-258		PFKL	0.0656995		RAD23A	0.0314991
SUV39H1	8		SH2D1A	0.0166182		SF3A1	0.294314		FASLG	-260		MAP3K5	0.0653171		ATF7IP	0.0311643
PFDN1	8		DAZAP2	0.0157863		CASP3	0.293333		DAXX	-261		TUBB6	0.0648563		DDX58	0.0301041
FADD	8		MRFAP1L1	0.01562		DDX58	0.292748		EIF3M	-263		PRPF19	0.0641309		LAT	0.0290114
CCT5	8		AP2B1	0.0155241		RAD23A	0.292748		SF3A1	-264		IFIT1	0.0640164		AP2B1	0.0287543
NFKB1	8		USP11	0.01535		IFIT1	0.292165		MCM6	-266		PPIB	0.0598677		PARP1	0.0278137
CD2BP2	8		NFKB1	0.0149492		RNPS1	0.291391		SPTAN1	-266		CASP3	0.0591802		MCM6	0.0277767
RAD23A	8		ATF7IP	0.0147602		NOTCH2NL	0.291198		STAT1	-266		NFKB1	0.0575131		NFKB1	0.0270703
DDX58	8		DDX58	0.0136745		H2AFX	0.291005		CD247	-270		SF3A1	0.0570878		XRCC5	0.0268758
LRPPRC	8		SELPLG	0.0135742		ATF7IP	0.290429		IRF3	-272		ZC3H7B	0.0569288		SPTAN1	0.0268726
MCRS1	8		MYH9	0.0134667		TUBB3	0.290237		DDX58	-272		PFDN1	0.0564214		SH2D1A	0.026851
XRCC5	8		MSH2	0.013282		NFKB1	0.289664		PPP2R2B	-275		SP1	0.0538715		PSMB3	0.0268469
TAGLN2	7		RAD23A	0.0132323		CASP8	0.288714		SLIRP	-277		TRMT112	0.0537424		MRFAP1L1	0.0262882
SPTAN1	7		TUBGCP4	0.0127451		PRKCQ	0.288714		ZC3H7B	-278		TUBB3	0.0506944		MSH2	0.0258098
UPF1	7		B2M	0.0126095		EIF3D	0.288336		TUBB3	-279		PNP	0.0505037		NUP62	0.0256862
MAP3K5	7		XRCC5	0.0126025		PPIB	0.28777		USP7	-283		DHX15	0.0489108		FLOT1	0.0252993
AP2B1	7		PRMT1	0.011766		PFDN1	0.287206		MAGED1	-286		FAS	0.0487602		FADD	0.0252874
CASP9	7		PARP1	0.0114325		HNRNPH1	0.287019		GZMB	-288		UBE2M	0.0471358		MYH9	0.0251522
NUP62	7		SF3B3	0.0112748		PPP2R2B	0.286086		PEBP1	-288		MSH2	0.0469863		MAP3K5	0.0248849
ATF7IP	7		CCR5	0.011173		CAMK2G	0.286086		UPF1	-291		NOC2L	0.046671		TAP1	0.0241404
EIF3D	7		MCRS1	0.0110856		UPF1	0.285714		CASP8	-292		CDKN1A	0.0454205		CD2BP2	0.0241078
USP11	7		SMAD7	0.0108801		DAXX	0.285344		MYH9	-294		CUL4A	0.0453798		PRMT1	0.0240794
TUBB	6		CAPN10	0.0106949		UBQLN4	0.285344		EIF3D	-295		SEC61A1	0.0443684		PSMD4	0.0240181
UBE2M	6		NUP62	0.0105461		CDKN1A	0.285159		MCRS1	-296		GZMB	0.0441433		UBE2M	0.0239745
SH2D1A	6		CCT5	0.0105188		MSH2	0.285159		PPIB	-298		HIST1H2BC	0.0437265		ALYREF	0.0238753
S100A8	6		UBE2M	0.0104399		TRIM32	0.284974		PFDN1	-301		IFIT2	0.0436214		DAZAP2	0.0230951
IKZF3	6		PPP2R2B	0.0104366		MAP4K1	0.284974		PRPF19	-302		ACLY	0.0436189		TRIB2	0.0229863
MCM6	6		SMYD3	0.0103175		FASLG	0.284605		PFKP	-302		ARMC6	0.043607		CCT5	0.0224826
SF3A1	6		PPIB	0.0100903		CUL4A	0.284054		HNRNPH1	-302		CDC37L1	0.0432224		S100A8	0.0216922
ABI3	6		GLRX3	0.00999293		NOC2L	0.283871		PRMT1	-304		EIF2AK1	0.0418025		SF3A1	0.0213454
FHL2	6		TRIB2	0.00967386		SEC61A1	0.283505		MSH2	-306		IRF1	0.0415655		CUL4A	0.0212992
PRKCQ	6		PSMB3	0.00965953		DHX15	0.283505		SUV39H1	-307		IRF7	0.0414891		GLRX3	0.021087
MSH2	6		PSMD3	0.00948181		MAGED1	0.28169		BABAM1	-311		ARID5B	0.0409826		HNRNPH1	0.0205571
GLRX3	6		FHL2	0.00930049		GZMB	0.28169		NOC2L	-313		CASP8	0.0400291		PSMA2	0.020273
SMAD7	6		POLA2	0.00910126		CDC37L1	0.28115		DHX15	-315		S100A8	0.0398161		TXN2	0.0201424
EIF3C	6		SELP	0.00908055		PRMT1	0.280791		SEC61A1	-315		PRKCQ	0.0395592		TAGLN2	0.020104
IL2RG	6		ARPC2	0.00908055		EIF2AK1	0.280433		LUC7L2	-321		RAD23A	0.0394405		FHL2	0.0198874
EIF3M	6		ARID5A	0.0090702		MCRS1	0.280255		PBXIP1	-323		GLRX3	0.0393417		CASP9	0.0198313
HNRNPH1	6		HSD17B10	0.0090702		ARMC6	0.280076		ALYREF	-324		IFIT5	0.0390742		SF3B3	0.0197633
MYH9	5		THAP7	0.0090702		PFKL	0.27972		SNX9	-325		FHL2	0.0389252		TUBGCP4	0.0194469
WBP11	5		UBE2L3	0.0090702		CDK18	0.279543		IKZF3	-326		RPN2	0.0388662		IKZF3	0.0193614
PFKL	5		HNRNPM	0.00877994		TUBGCP4	0.278305		IFIT2	-330		ATF7IP	0.0386581		IFIT1	0.0193144
SNRPB	5		SPTAN1	0.00873093		GLRX3	0.277953		IFIT1	-330		TUBGCP4	0.0385524		EIF3M	0.0192199
CUL4A	5		GZMB	0.00855812		TRMT112	0.277778		S100A8	-332		RFC4	0.0384971		PSMD3	0.0191611
TXN2	5		HSPH1	0.00850685		ARID5B	0.277778		FARS2	-332		CAMK2G	0.0381704		PPIB	0.0191609
SF3B3	5		SEC61A1	0.00845864		MCM6	0.277603		ARMC6	-334		RPL31	0.0367547		SF1	0.0189667
DHX15	5		RAD54B	0.00833389		DYRK4	0.277427		IFIT5	-334		MAP4K1	0.035542		IFIT2	0.018961
CCR5	5		CUL4A	0.00799796		RFC4	0.277427		FLNB	-335		PIH1D1	0.0354959		CCR5	0.0185713
TAP1	5		ALYREF	0.00789755		UBE2M	0.27673		PIH1D1	-336		UPF1	0.0346949		WBP11	0.0184958
HNRNPM	5		IKZF3	0.00784532		PEBP1	0.276556		RBX1	-340		PEBP1	0.0344412		HNRNPM	0.018362
PSMD3	5		SF3A1	0.00753858		TRIB2	0.276382		TRIB2	-340		PSMB10	0.0344343		EIF3D	0.0183111
DAZAP2	5		EIF3D	0.00737244		RBX1	0.276382		SH2D1A	-341		BIN1	0.0339761		B2M	0.0181398
PRMT1	5		FADD	0.00725598		PIH1D1	0.275517		EIF3C	-341		FH	0.03297		PRKCQ	0.0180008
TUBB3	5		DYRK4	0.00722449		LUC7L2	0.274828		PFKL	-342		MAGED2	0.032842		FARS2	0.0179739
TRIB2	5		MZT2B	0.00714896		HIST1H2BC	0.274828		NFKB1	-343		MAGED1	0.0328226		SMAD7	0.0179249
TGFBR2	5		TAP1	0.00708083		RUNX3	0.274657		TUBA1B	-343		UQCC2	0.0326827		PBX2	0.0177629
CCT8	5		S100A8	0.00702096		DDX20	0.274485		TUBGCP4	-344		ACP1	0.0326827		TUBB	0.0177311
NOA1	4		UNC45A	0.00637641		IFIT2	0.274485		FADD	-346		MRPS14	0.0326827		MZT2B	0.0176446
B2M	4		HNRNPH1	0.00630312		PNP	0.274314		MRPL40	-346		CRYZ	0.0326827		BCL2L1	0.0174568
LEF1	4		PSMD4	0.00621564		IFIT5	0.273973		ARID5B	-347		MLEC	0.0326827		SEC61A1	0.0168758
PACSIN1	4		PRKCQ	0.00609064		IRF1	0.273802		PRKCQ	-348		MANF	0.0326827		HSPH1	0.0168664
IRF1	4		TGFBR2	0.0060287		CASP9	0.273122		RFC4	-349		DDX20	0.032343		SNX9	0.016626
PACSIN2	4		TAGLN2	0.00593389		TP53RK	0.272784		DAZAP2	-350		TAF9	0.0318595		MAPRE2	0.0165254
UNC45A	4		PFKL	0.00584169		SLIRP	0.272446		RUNX3	-350		EIF3C	0.0317402		SMYD3	0.0164883
CDC37L1	4		VAV2	0.00569376		FBXO18	0.272446		WBP11	-352		ABCB1	0.0316539		DHX15	0.0163452
MED28	4		SPRED1	0.00568384		FAM162A	0.272446		CASP9	-352		CASP9	0.0316109		RBX1	0.0162046
PSMB10	4		GANAB	0.00548932		TREX1	0.272446		GLRX3	-352		MCM6	0.0315086		GANAB	0.0159757
MZT2B	4		EIF3C	0.00526552		MAP4K2	0.272446		AP2B1	-353		IL16	0.0314699		ABI3	0.0155605
IL7	4		TRIM32	0.00520798		PRKCH	0.272446		ZNF587	-353		UBR2	0.0313898		CAPN10	0.0155502
ALYREF	4		MED28	0.00518322		PCGF1	0.272446		TRMT112	-353		PFKP	0.0313817		ATP5C1	0.015351
SF1	4		TUBB3	0.00518212		SGK223	0.272446		IL2RG	-355		ATP5C1	0.0306124		EIF3C	0.0153299
CASP8AP2	4		ZNF587	0.00499762		FBXL3	0.272446		BCL2L1	-357		PRMT1	0.0305417		TUBB3	0.0149609
TIRAP	4		FARS2	0.00492283		FBXL14	0.272446		VAV2	-358		SLIRP	0.0305036		CCT8	0.0149383
TUBA1B	4		TIRAP	0.0048421		HERC6	0.272446		UBE2M	-359		GTF3C1	0.0303387		VAV2	0.014372
MAPRE2	4		MAPRE2	0.00470319		SUV39H1	0.271605		USP11	-359		HEATR3	0.0300464		IL2RG	0.0143162
VAV2	4		RPS7	0.00469068		RPN2	0.270104		CDK13	-360		MRPS22	0.0300464		UNC45A	0.0143011
PIH1D1	4		CCT8	0.00469066		FHL2	0.269443		CAMK2G	-362		IDH3G	0.0300464		RAD54B	0.0141982
IFIT5	4		IL16	0.00465972		ALYREF	0.269443		RCN2	-363		DIP2B	0.0300464		TGFBR2	0.0139212
TUBB6	4		CASP8AP2	0.00454545		ZNF587	0.269443		NAE1	-363		ZBTB18	0.0300464		POLA2	0.013597
GANAB	4		MAL	0.00454545		CDK13	0.269443		DDX20	-366		SMYD4	0.0300464		SELPLG	0.0135742
FARS2	4		BIN1	0.00454545		IL16	0.269278		CREB3	-366		OPHN1	0.0300464		SPRED1	0.0135543
RBX1	4		IRF9	0.00454545		ACLY	0.269113		MAP4K1	-368		NAIP	0.0300464		TUBB6	0.0132295
TUBGCP4	4		ORC6	0.00454545		PFKP	0.268293		TRIM32	-368		RALGAPA1	0.0300464		LUC7L2	0.0129093
POLA2	4		S1PR1	0.00454545		MAGED2	0.268293		HIST1H2BC	-370		PTPN14	0.0300464		LEF1	0.0126176
MAL	4		GGA1	0.00454545		IKZF3	0.267477		TUBA1C	-371		ARSB	0.0300464		PFKL	0.0125053
SNX9	4		DTX3	0.00454545		RPL31	0.266344		CUL4A	-373		PADI2	0.0300464		TIRAP	0.0124182
FLNB	4		GNAI1	0.00454545		S100A8	0.266183		TAP1	-373		PSME4	0.0300464		IFIT5	0.0123685
CD2	4		ATP6V1G1	0.00454545		IRF7	0.26538		PNP	-373		ICA1	0.0300464		FLNB	0.0119304
HSPH1	4		NUMBL	0.00454545		UBR2	0.26522		TSG101	-375		ALDH18A1	0.0300464		NOC2L	0.0118169
PPIB	4		OTUD5	0.00454545		BABAM1	0.264423		GTF2B	-376		MDN1	0.0300464		PBXIP1	0.0115158
DDX20	3		URM1	0.00454545		ATP5C1	0.263947		IRF1	-376		NUP188	0.0300464		SNRPB	0.011202
RPS7	3		PTPN12	0.00454545		TAF9	0.263947		HAUS1	-382		CDK18	0.0299482		MRPL40	0.0111579
RFC4	3		SH2D2A	0.00454545		FH	0.263789		ATG10	-384		BABAM1	0.0299061		ZNF587	0.0111113
TRIP10	3		TP53RK	0.00454545		EIF3C	0.263473		LAT	-385		TUBA1C	0.0290101		CDC37L1	0.0110033
TAF9	3		SPATA2	0.00454545		ACP1	0.263473		TFG	-386		TRIM32	0.0287834		MED28	0.010991
NOC2L	3		NDUFAB1	0.00454545		MRPS14	0.263473		TIRAP	-387		RBX1	0.0284263		SLIRP	0.0109732
SELP	3		ATP13A2	0.00454545		UQCC2	0.263473		EXT2	-388		NOTCH2NL	0.028103		GTF2B	0.0107919
ATP5C1	3		ADAM33	0.00454545		CRYZ	0.263473		TUBB4B	-388		DYRK4	0.0276438		DYRK4	0.0106617
ARID5A	3		EAPP	0.00454545		MLEC	0.263473		CDC37L1	-389		TP53RK	0.0271187		PEBP1	0.0104006
IRF7	3		FH	0.00454545		MANF	0.263473		PBX2	-389		TREX1	0.0268824		TRMT112	0.0102468
GTF2B	3		IFIT1	0.00453744		SH2D1A	0.263315		MPRIP	-389		FBXO18	0.0268824		IRF1	0.0102276
TFG	3		GTF3C1	0.00449368		BIN1	0.263315		NDC80	-390		PRKCH	0.0268824		NDC80	0.0101541
BCL2L1	3		TUBB	0.00438749		GTF3C1	0.263315		SF1	-391		SGK223	0.0268824		IL16	0.00993221
SMYD3	3		BCL2L1	0.00435567		LEF1	0.263158		ANXA6	-391		MAP4K2	0.0268824		RCN2	0.00992768
PEBP1	3		NOC2L	0.00429009		FLNB	0.263001		MAPRE2	-392		FAM162A	0.0268824		GTF3C1	0.00991303
NDC80	3		DHX15	0.00425321		ABCB1	0.262843		MED28	-392		PCGF1	0.0268824		BIN1	0.00983286
PBX2	3		EIF3M	0.00415691		ARSB	0.26253		RPN2	-392		FBXL3	0.0268824		C9orf156	0.00970639
LUC7L2	3		TUBB6	0.00373905		PTPN14	0.26253		CCND2	-392		FBXL14	0.0268824		FARSA	0.00961578
TRIM32	3		SNX9	0.00336022		DIP2B	0.26253		SNRPB	-393		HERC6	0.0268824		TAF9	0.00959494
SEC61A1	3		SF1	0.00334769		NAIP	0.26253		EIF2AK1	-393		ALYREF	0.026105		TRIM69	0.00953819
SLIRP	3		NDUFA9	0.00334189		RALGAPA1	0.26253		CD2BP2	-395		RCN2	0.0260834		RPS7	0.00950685
PRPF19	3		WBP11	0.00325848		MRPS22	0.26253		TXN2	-395		CDK13	0.0249142		CASP8AP2	0.00940092
RAD54B	3		EIF5A	0.00309516		HEATR3	0.26253		NUP62	-395		RNPS1	0.024602		ARPC2	0.00908055
TRIM69	3		PBXIP1	0.00306098		PADI2	0.26253		GATA3	-396		MCRS1	0.0234811		SELP	0.00908055
NDUFA9	3		MRPL40	0.00289657		SMYD4	0.26253		FHL2	-396		MPRIP	0.023074		HSD17B10	0.00907365
TRMT112	3		IL2RG	0.00284881		OPHN1	0.26253		IL7	-396		FLNB	0.0229957		ARID5A	0.0090702
FLOT1	3		CASP9	0.00274403		MDN1	0.26253		HERC5	-397		RUNX3	0.0229253		UBE2L3	0.0090702
LAT	3		LUC7L2	0.00273623		ALDH18A1	0.26253		IL16	-397		FASLG	0.0219834		THAP7	0.0090702
BIN1	3		CDC37L1	0.00269991		ZBTB18	0.26253		CDK18	-398		LUC7L2	0.0208253		SLAMF7	0.00898739
TUBA1C	3		UBR2	0.00254064		PSME4	0.26253		SPRED1	-399		COPS3	0.0206127		NAE1	0.008809
IRF9	3		CD2BP2	0.00247964		IDH3G	0.26253		SLAMF7	-402		AASDHPPT	0.0206127		PRPF19	0.00872568
ORC6	3		ABI3	0.00245738		ICA1	0.26253		COPS3	-402		MRPL40	0.0204444		TRIM32	0.00871271
SMURF1	3		PAICS	0.00241956		NUP188	0.26253		AASDHPPT	-402		UBQLN4	0.0203639		NDUFA9	0.00869224
RUNX3	3		PSMA2	0.00238643		SMAD7	0.261749		MAGED2	-403		SNRPB	0.02035		IRF7	0.00843187
ARPC2	3		DDX20	0.00237657		FARS2	0.260664		ACLY	-404		LEF1	0.0202141		DAP3	0.00838044
FARSA	3		TAF9	0.00227082		PTPN12	0.260509		PCCA	-404		ZNF235	0.0201869		NHP2L1	0.00812798
HSD17B10	3		SLIRP	0.00222738		WBP11	0.260509		B2M	-405		ANXA6	0.0198637		CRBN	0.00793035
TAP2	3		TRMT112	0.00200312		BCCIP	0.260509		CCR5	-405		TUBA1B	0.0191191		UBR2	0.00762739
SPRED1	3		RFC4	0.00198327		ZNF235	0.260355		NPRL2	-405		B2M	0.0186373		NOA1	0.00755476
CCND2	3		IRF1	0.00196818		USP7	0.258671		TRIM69	-406		HERC5	0.0183992		SMURF1	0.00748635
DAP3	3		PEBP1	0.00193089		MRPL40	0.258671		RPS7	-407		ARPC2	0.0181371		DDX20	0.00737971
THAP7	3		TXN2	0.00183525		RCN2	0.258216		CD2	-407		PAICS	0.0180701		TFG	0.00719756
RCN2	3		FLNB	0.00183438		SMYD3	0.258065		CAPN10	-408		IKZF3	0.0179473		PAICS	0.00719635
HERC5	2		IFIT2	0.0017834		USP11	0.25656		FLOT1	-409		SH2D1A	0.0178796		PIH1D1	0.00708699
S1PR1	2		DXO	0.00165298		VAV2	0.256112		ATXN10	-410		RPL38	0.017821		TRIP10	0.00708073
NUDT2	2		PBX2	0.001469		C12orf76	0.255963		DYRK4	-410		GOT1	0.017821		EIF5A	0.00704995
GGA1	2		RBX1	0.00146467		FBXW4	0.255963		ZNF235	-410		DRG1	0.017821		EXT2	0.00693604
DTX3	2		ZC3H7B	0.00144985		WDR70	0.255963		MRFAP1L1	-411		APEH	0.017821		RFC4	0.00689687
GTPBP3	2		ARID5B	0.00141369		CRYM	0.255963		TRIP10	-412		TXNDC17	0.017821		TUBA1B	0.00687912
TUBB4B	2		DAP3	0.00138979		SAFB	0.255963		C9orf156	-414		TFG	0.0176872		DXO	0.00677377
GNAI1	2		TFG	0.00138534		NCOA5	0.255963		FARSA	-414		DAXX	0.0176185		ATG10	0.00673528
IL16	2		IRF7	0.00117463		LAT	0.255517		PSMB10	-418		ZNF587	0.0175434		NIF3L1	0.00643826
GATA3	2		PFKP	0.00117341		FADD	0.25522		TBX21	-419		BCCIP	0.0172206		RPN2	0.00636836
EIF2B2	2		NDC80	0.00103929		TUBA1B	0.255072		ABI3	-419		TRIB2	0.0167604		CD2	0.00630554
ACLY	2		SNRPB	0.00100713		MED28	0.254482		LEF1	-420		SMAD7	0.0167363		ARID5B	0.0062533
DXO	2		PRPF19	0.00100322		TUBA1C	0.254482		CRBN	-420		ATXN10	0.0166246		SRRT	0.00622796
CRBN	2		RCN2	0.00097854		MRFAP1L1	0.254335		SRRT	-420		SMYD3	0.015475		GATA3	0.00620547
UBE2L3	2		IFIT5	0.00096253		CREB3	0.253749		RAD54B	-421		SUV39H1	0.0152495		AASDHPPT	0.00617023
ATXN10	2		RPN2	0.00095636		PSMB10	0.25331		RPL31	-421		FARS2	0.015235		COPS3	0.00617023
TNRC6C	2		NAE1	0.00090752		BCL2L1	0.253165		UBR2	-422		RPS7	0.0152112		TBX21	0.00613976
ATP6V1G1	2		CD2	0.00084293		ABI3	0.253165		TGFBR2	-422		BCL2L1	0.0149613		MAP4K1	0.00605262
LDLRAP1	2		EXT2	0.00082093		RAD54B	0.252874		SMYD3	-425		SAFB	0.01492		PFKP	0.0060505
ARID5B	2		C9orf156	0.0007987		SNRPB	0.252438		NIF3L1	-425		C12orf76	0.01492		PSMB10	0.00599548
NUMBL	2		ARMC6	0.0007469		CD2	0.252294		DXO	-426		CRYM	0.01492		TUBA1C	0.0059098
TBX21	2		TBX21	0.00069641		HERC5	0.251429		IRF7	-427		NCOA5	0.01492		XRN2	0.00587548
GTF3C1	2		MAGED2	0.00069416		COPS3	0.250427		SMURF1	-429		FBXW4	0.01492		ZC3H7B	0.00587161
PRF1	2		HLA-E	0.00069255		AASDHPPT	0.250427		SMAD7	-429		WDR70	0.01492		RUNX3	0.00583005
ARMC6	2		CDK18	0.00069128		B2M	0.25		TAF9	-430		UACA	0.0146233		ABCB1	0.00574455
RPL31	2		GATA3	0.00064999		CAPN10	0.249858		ATP5C1	-430		IARS	0.0146233		BCCIP	0.00567908
EIF2AK1	2		SRRT	0.00055027		TFG	0.249575		PAICS	-430		MYO1C	0.0146233		ZNF235	0.00555378
ZNF587	2		SLAMF7	0.00053743		MPRIP	0.249575		XRN2	-432		TIRAP	0.0143916		CDK13	0.00554275
EXT2	2		ABCB1	0.00053283		HAUS1	0.248869		EIF5A	-432		PTPN12	0.0143911		ATXN10	0.00553011
ZNF235	2		CDK13	0.00050576		IL2RG	0.248869		POLA2	-432		TUBB4B	0.0143869		MAGED2	0.00541982
PFKP	2		LEF1	0.00046947		ANXA6	0.248307		SELPLG	-433		CCND2	0.014234		CDK18	0.00540851
FBXO18	2		TRIM69	0.00046591		TIRAP	0.248027		NOA1	-434		MRFAP1L1	0.0140366		ARMC6	0.00533486
BCCIP	2		FARSA	0.00045431		CCND2	0.247748		NDUFA9	-434		PCCA	0.0137367		NPRL2	0.00530081
CAPN10	2		COPS3	0.00045285		IL3RA	0.247748		DAP3	-434		ABI3	0.013629		HERC5	0.00520459
C9orf156	2		AASDHPPT	0.00045285		SNX12	0.247748		CASP8AP2	-434		ACP6	0.0135606		IL7	0.00505962
OTUD5	2		GTF2B	0.0004526		CKAP5	0.247748		GTF3C1	-434		PARVB	0.0135606		TAP2	0.00495838
CAMK2G	2		PNP	0.00035975		SNX9	0.247191		BIN1	-434		GLUD1	0.0135606		MPRIP	0.00484337
PARVB	2		ZNF235	0.0003437		ATXN10	0.247191		NHP2L1	-434		CNNM3	0.0135606		HLA-E	0.0047955
URM1	2		ACLY	0.00033663		SF1	0.247052		TRA2A	-434		SF1	0.0133894		EIF2AK1	0.00465406
PHF21A	2		MPRIP	0.00029765		MBP	0.247052		UBE2L3	-435		CAPN10	0.0130856		ANXA6	0.00462154
SRRT	2		HIST1H2BC	0.00028952		MAPRE2	0.246499		THAP7	-435		RAD54B	0.0123598		MAL	0.00454545
PTPN12	2		SMURF1	0.00028845		PAICS	0.246499		ARPC2	-435		WBP11	0.0119128		PTPN12	0.00454545
DHRS1	2		TRIP10	0.00027032		RPS7	0.246085		SELP	-435		GTF2B	0.011883		SPATA2	0.00454545
GTF3C5	2		BCCIP	0.0002573		ARPC2	0.24581		ARID5A	-435		HAUS1	0.0115667		OTUD5	0.00454545
MAP4K1	2		TUBA1C	0.00024803		RPL38	0.245262		HSD17B10	-435		MBP	0.011288		ATP6V1G1	0.00454545
NAE1	2		NPRL2	0.00022803		GOT1	0.245262		FH	-437		ATP13A2	0.0111409		TP53RK	0.00454545
PCCA	2		XRN2	0.00022339		DRG1	0.245262		S1PR1	-437		LGMN	0.0109362		ORC6	0.00454545
SH2D2A	2		NOA1	0.00020693		APEH	0.245262		DTX3	-437		GBP1	0.0109362		IRF9	0.00454545
COPS3	2		HERC5	0.00020589		TXNDC17	0.245262		NDUFAB1	-437		PPP1R10	0.0109362		ADAM33	0.00454545
RPN2	2		PIH1D1	0.00019576		AP2B1	0.244309		GNAI1	-437		MX1	0.0109362		EAPP	0.00454545
HLA-E	2		CRBN	0.00018818		EXT2	0.244309		ATP6V1G1	-437		WDR1	0.0109362		NUMBL	0.00454545
DYRK4	2		RPL31	0.00018713		GTF2B	0.244173		NUMBL	-437		FADD	0.0108863		SH2D2A	0.00454545
NPRL2	2		TUBA1B	0.00018684		PBXIP1	0.243363		MAL	-437		USP7	0.0107895		URM1	0.00454545
TP53RK	2		TAP2	0.00018216		PARVB	0.243228		PTPN12	-437		VAV2	0.0107574		ATP13A2	0.00454545
NHP2L1	2		CAMK2G	0.00017782		ACP6	0.243228		ABCB1	-437		MAPRE2	0.0105118		S1PR1	0.00454545
BOLA1	2		NIF3L1	0.00017189		GLUD1	0.243228		BCCIP	-437		CREB3	0.0103549		GGA1	0.00454545
TCL1A	2		PCCA	7.98e-05		CNNM3	0.243228		ORC6	-437		MRPL43	0.00999411		FH	0.00454545
ABCB1	2		TUBB4B	5.529e-05		DAZAP2	0.242024		OTUD5	-437		IL2RG	0.00995469		DTX3	0.00454545
PSMG2	2		NHP2L1	3.106e-05		ATP13A2	0.242024		TAP2	-437		LAT	0.00982761		NDUFAB1	0.00454545
TRA2A	2		TRA2A	2.019e-05		LGMN	0.241891		URM1	-437		EXT2	0.00950681		GNAI1	0.00454545
SPATA2	2		PACSIN1	0		MX1	0.241891		SH2D2A	-437		CD2	0.00942553		CAMK2G	0.00444645
FIBCD1	2		PACSIN2	0		GBP1	0.241891		HLA-E	-437		TNRC6C	0.00940763		PCCA	0.00424593
PCED1B	2		PSMB10	0		PPP1R10	0.241891		GGA1	-437		MED28	0.0092263		PNP	0.00424323
AASDHPPT	2		IL7	0		WDR1	0.241891		TP53RK	-437		CCR5	0.00915215		TRA2A	0.00395028
PAICS	2		RUNX3	0		CCR5	0.24136		SPATA2	-437		NUP62	0.00912063		HIST1H2BC	0.00383955
ZC3H7B	2		CCND2	0		NUP62	0.241228		ATP13A2	-437		HSD17B10	0.00899269		ACLY	0.00383357
NDUFAB1	2		NUDT2	0		GATA3	0.240569		IRF9	-437		TDP1	0.00881983		RPL31	0.00372553
SELPLG	2		GTPBP3	0		PCCA	0.240569		ADAM33	-437		TOR1B	0.00881983		CCND2	0.00362747
TBCB	2		EIF2B2	0		CD2BP2	0.240175		EAPP	-437		BAZ1B	0.00881983		TUBB4B	0.00287974
CDK13	2		ATXN10	0		UACA	0.240175		PACSIN1	-438		SNX12	0.00865956		TRMT10C	0.00151515
TMEM126B	2		TNRC6C	0		MRPL43	0.240175		PACSIN2	-438		CKAP5	0.00865956		KIAA0391	0.00151515
ATP13A2	2		LDLRAP1	0		IARS	0.240175		TRMT10C	-438		IL3RA	0.00865956		PACSIN2	0.00151515
CHCHD2	2		PRF1	0		MYO1C	0.240175		KIAA0391	-438		NPRL2	0.00864002		PACSIN1	0.00151515
CDK18	2		EIF2AK1	0		TUBB4B	0.238353		C3	-439		FANCF	0.00861192		SLC2A3	3.67852e-16
IKZF4	2		FBXO18	0		NAE1	0.237069		ACP6	-439		EIF5A	0.00855442		SLC41A3	3.66675e-16
MPRIP	2		PARVB	0		TAP1	0.236686		CMSS1	-439		ACOT7	0.00845075		RIMS3	3.52549e-16
NIF3L1	2		PHF21A	0		NPRL2	0.236559		NUDT2	-439		DNASE1L3	0.00845075		SEC61G	3.51372e-16
MAGED2	2		DHRS1	0		CRBN	0.236178		CD5	-439		LRRFIP2	0.00845075		KLRD1	3.48429e-16
ADAM33	2		GTF3C5	0		IL7	0.236178		RNF38	-439		CCR7	0.00845075		UBE2O	3.39012e-16
MED12	2		MAP4K1	0		TBX21	0.236051		UACA	-439		GATA3	0.00831547		CYB561	3.37247e-16
PNP	2		BOLA1	0		SPRED1	0.235168		GTPBP3	-439		CD2BP2	0.00820539		UGGT2	3.1135e-16
FAM162A	2		TCL1A	0		RNF4	0.234417		NT5C3A	-439		USP11	0.00815606		MICU1	3.10173e-16
PBXIP1	2		PSMG2	0		EIF5A	0.234292		HBP1	-439		IRF9	0.00784191		DHRS1	3.02521e-16
EAPP	2		FIBCD1	0		IRF9	0.234167		KLRD1	-439		RNF4	0.00773649		PSMG2	2.83099e-16
SLAMF7	2		PCED1B	0		FANCF	0.233918		GNG2	-439		IL7	0.00755529		MED22	2.81922e-16
ATG10	2		TBCB	0		S1PR1	0.233794		KIF13A	-439		TRA2A	0.00753981		PCED1B	2.75448e-16
XRN2	2		TMEM126B	0		TCL1A	0.233794		CORO1B	-439		GFI1	0.0068562		TBC1D10C	2.75448e-16
ANXA6	2		CHCHD2	0		HERC1	0.233794		DOCK4	-439		GZMA	0.00674759		ZNF440	2.73093e-16
SMOC1	2		IKZF4	0		GZMA	0.23367		EIF2B2	-439		PLEK	0.00662603		ARID3A	2.71916e-16
UBR2	2		MED12	0		ASH2L	0.233546		EPSTI1	-439		NDC80	0.0063466		SMOC1	2.70739e-16
HIST1H2BC	2		FAM162A	0		ACOT7	0.233422		TOPORS	-439		NAE1	0.00630102		ZCCHC17	2.68973e-16
MRPL40	2		ATG10	0		DNASE1L3	0.233422		UQCC2	-439		AP2B1	0.00627379		BTBD6	2.67208e-16
ORC4	2		ANXA6	0		LRRFIP2	0.233422		ZNF580	-439		TCL1A	0.00624955		RAB3IL1	2.66619e-16
TBC1D10C	2		SMOC1	0		CCR7	0.233422		ACP1	-439		HERC1	0.00624955		ZNF670	2.64265e-16
CCL4	2		ORC4	0		TSG101	0.232804		GP1BA	-439		GTPBP3	0.00613297		GTPBP2	2.64265e-16
ARID3A	2		TBC1D10C	0		TNRC6C	0.232804		TNRC6C	-439		TBX21	0.00580507		GTF3C5	2.62499e-16
MORF4L2	2		CCL4	0		PLEK	0.230729		WDTC1	-439		SPRED1	0.00571325		FIBCD1	2.46608e-16
EIF5A	2		ARID3A	0		PBX2	0.229645		ATP6V1E1	-439		CRBN	0.00565966		RPL38	2.43665e-16
ZNF440	2		MORF4L2	0		NDC80	0.229645		LDLRAP1	-439		IL18	0.0055244		RNF4	2.43665e-16
FH	2		ZNF440	0		SRRT	0.227979		RNF167	-439		GZMH	0.0055244		GZMA	2.43077e-16
TRMT10C	2		TRMT10C	0		SLAMF7	0.227625		SLAMF1	-439		INTS3	0.00536878		CRYM	2.40428e-16
KIAA0391	2		KIAA0391	0		IL18	0.226921		SLAMF6	-439		CD82	0.00536878		ARPC4	2.37191e-16
C3	1		C3	0		GZMH	0.226921		MEF2A	-439		COMMD6	0.00536878		INTS3	2.34837e-16
ACP6	1		ACP6	0		DBI	0.226571		USF2	-439		EOMES	0.00526687		COMMD6	2.34837e-16
CD5	1		CD5	0		THAP7	0.226105		GAA	-439		SNX9	0.00520995		LDLRAP1	2.32777e-16
KLRD1	1		KLRD1	0		HSD17B10	0.225989		CRCP	-439		TAP1	0.0052043		LRRFIP2	2.31305e-16
UACA	1		UACA	0		TXN2	0.225989		TBCB	-439		S1PR1	0.00507304		TCL1A	2.31011e-16
RNF38	1		RNF38	0		DHRS1	0.225641		PRF1	-439		ASH2L	0.00502883		SNX12	2.2954e-16
CMSS1	1		CMSS1	0		GTF3C5	0.225641		CCL4	-439		DAZAP2	0.00500893		MBP	2.27774e-16
GFI1	1		GFI1	0		PSMG2	0.225641		RPL38	-439		CASP8AP2	0.00479467		CREM	2.27185e-16
RNF167	1		RNF167	0		PCED1B	0.225641		ARL6IP5	-439		PBX2	0.0044879		ACOT7	2.26597e-16
NT5C3A	1		NT5C3A	0		SMOC1	0.225641		TREX1	-439		RNF167	0.00440007		TREX1	2.23948e-16
HBP1	1		HBP1	0		TBC1D10C	0.225641		LGMN	-439		GALNT12	0.00438611		NCOA5	2.21888e-16
GNG2	1		GNG2	0		ARID3A	0.225641		GBP1	-439		TDRD7	0.00438611		IL3RA	2.213e-16
KIF13A	1		KIF13A	0		ZNF440	0.225641		PPP1R10	-439		NRBP1	0.00423994		CD82	2.213e-16
CORO1B	1		CORO1B	0		RAB3IL1	0.225641		MX1	-439		TTLL5	0.00423994		TTLL5	2.20123e-16
ARSB	1		ARSB	0		BAZ1B	0.225525		WDR1	-439		WDTC1	0.00423615		CKAP5	2.18357e-16
EPSTI1	1		EPSTI1	0		TOR1B	0.225525		TCL1A	-439		PRF1	0.00412072		DNASE1L3	2.16591e-16
ZNF580	1		ZNF580	0		TDP1	0.225525		CHMP2B	-439		UBE2L3	0.0037698		CCR7	2.1306e-16
DUT	1		DUT	0		KIF13A	0.225179		CHCHD2	-439		HBP1	0.00373667		NRBP1	2.0894e-16
ACOT7	1		ACOT7	0		ZNF518A	0.225179		HEATR3	-439		EPSTI1	0.00373667		WDR1	2.06586e-16
TDRD7	1		TDRD7	0		CASP8AP2	0.224719		PARVB	-439		TOPORS	0.00373667		RBM19	2.05409e-16
ERP27	1		ERP27	0		TRIP10	0.224719		GLUD1	-439		PARP10	0.00373667		FBXO18	2.03937e-16
ACP1	1		ACP1	0		INTS3	0.224719		CNNM3	-439		USF2	0.00371679		CHCHD2	2.03054e-16
GP1BA	1		GP1BA	0		COMMD6	0.224719		MRPS22	-439		MEF2A	0.0036928		PRKCH	2.02466e-16
DNASE1L3	1		DNASE1L3	0		CD82	0.224719		IDH3G	-439		DBI	0.00368173		AGER	2.01289e-16
SEC61G	1		SEC61G	0		FLOT1	0.224604		DIP2B	-439		BOLA1	0.0036725		MAP4K2	2.007e-16
LCN2	1		LCN2	0		UBE2L3	0.224604		ZBTB18	-439		IKZF4	0.00363362		UQCC2	1.9761e-16
C12orf76	1		C12orf76	0		HBP1	0.224147		SMYD4	-439		ID3	0.00363362		SAFB	1.97169e-16
MEF2A	1		MEF2A	0		EPSTI1	0.224147		OPHN1	-439		KIF13A	0.00360868		SGK223	1.95403e-16
PTPN14	1		PTPN14	0		MEF2A	0.224147		NAIP	-439		ZNF518A	0.00360868		ZNF518A	1.95403e-16
CREM	1		CREM	0		TOPORS	0.224147		RALGAPA1	-439		NUDT3	0.00359882		WDR70	1.93049e-16
GAA	1		GAA	0		PARP10	0.224147		PTPN14	-439		PBXIP1	0.00354561		ACP1	1.92019e-16
CRCP	1		CRCP	0		TGFBR2	0.224033		ARSB	-439		DXO	0.00334239		WDTC1	1.91283e-16
DIP2B	1		DIP2B	0		GFI1	0.223919		PADI2	-439		SRRT	0.00330076		FBXW4	1.8834e-16
SLC2A3	1		SLC2A3	0		DXO	0.223805		PSME4	-439		URM1	0.0032672		PCGF1	1.85986e-16
LRRFIP2	1		LRRFIP2	0		EOMES	0.223237		ICA1	-439		SLAMF7	0.0032336		C12orf76	1.85986e-16
NAIP	1		NAIP	0		URM1	0.222559		ALDH18A1	-439		POLA2	0.00320581		FBXL14	1.8422e-16
RALGAPA1	1		RALGAPA1	0		ADAM33	0.222335		FBXO18	-439		BIN2	0.00317162		FBXL3	1.83632e-16
FBXW4	1		FBXW4	0		EAPP	0.222335		MRPS14	-439		TRIP10	0.00316417		FAM162A	1.77157e-16
DOCK4	1		DOCK4	0		ERP27	0.22211		LANCL2	-439		NHP2L1	0.00313134		HERC6	1.77157e-16
MRPS22	1		MRPS22	0		BTBD6	0.22211		MDN1	-439		SMURF1	0.00312687		IL18	1.74803e-16
RPL38	1		RPL38	0		TDRD7	0.221998		CRYM	-439		NDUFA9	0.00310014		TDRD7	1.70095e-16
WDR70	1		WDR70	0		TTLL5	0.221998		LCN2	-439		NUMBL	0.00309088		RNF167	1.69653e-16
ATP6V1E1	1		ATP6V1E1	0		NRBP1	0.221998		PHF21A	-439		C3	0.00307771		USF2	1.68035e-16
ARL6IP5	1		ARL6IP5	0		GALNT12	0.221998		IL18	-439		ORC6	0.00296714		PARVB	1.65975e-16
TREX1	1		TREX1	0		PACSIN1	0.221774		RBM19	-439		AAGAB	0.00296291		MX1	1.64209e-16
CHMP2B	1		CHMP2B	0		PACSIN2	0.221774		DHRS1	-439		NUDT2	0.00294129		GZMH	1.64209e-16
ARPC4	1		ARPC4	0		DOCK4	0.221662		GTF3C5	-439		TXN2	0.00287721		GALNT12	1.63621e-16
HEATR3	1		HEATR3	0		TRA2A	0.221551		CREM	-439		TSG101	0.00287493		CNNM3	1.60383e-16
IL3RA	1		IL3RA	0		WDTC1	0.221328		SLC41A3	-439		CHMP2B	0.00285763		MRPS14	1.60383e-16
PADI2	1		PADI2	0		NDUFA9	0.220441		AGER	-439		FAM83D	0.00285103		IKZF4	1.58912e-16
SMYD4	1		SMYD4	0		ATG10	0.22022		PRKCH	-439		SPATA2	0.00281624		ERP27	1.58323e-16
OPHN1	1		OPHN1	0		NUMBL	0.22011		GOT1	-439		MICU1	0.0027917		EOMES	1.53026e-16
MRPS14	1		MRPS14	0		PRF1	0.21989		UBE2O	-439		UGGT2	0.0027917		XPO6	1.50084e-16
SNX12	1		SNX12	0		FAM83D	0.219342		IARS	-439		NIF3L1	0.00266808		MED12	1.48318e-16
SLAMF1	1		SLAMF1	0		GTPBP3	0.218688		CYB561	-439		THAP7	0.00264665		GOT1	1.47729e-16
FAM83D	1		FAM83D	0		FARSA	0.218146		DRG1	-439		DHRS1	0.00262338		ID3	1.47141e-16
LGMN	1		LGMN	0		NUDT3	0.217822		MICU1	-439		GTF3C5	0.00262338		HAUS8	1.45375e-16
MDN1	1		MDN1	0		SMURF1	0.217714		UGGT2	-439		PSMG2	0.00262338		MDN1	1.44492e-16
ID3	1		ID3	0		ORC6	0.217606		MED22	-439		PCED1B	0.00262338		GLUD1	1.41255e-16
INTS3	1		INTS3	0		BOLA1	0.217606		RIMS3	-439		TBC1D10C	0.00262338		DRG1	1.40667e-16
CKAP5	1		CKAP5	0		NUDT2	0.217391		SNX12	-439		ZNF440	0.00262338		ATP6V1E1	1.38165e-16
PLEK	1		PLEK	0		RNF167	0.216856		CKAP5	-439		ARID3A	0.00262338		OPHN1	1.37429e-16
CRYM	1		CRYM	0		C14orf142	0.214425		IL3RA	-439		SMOC1	0.00262338		NUDT3	1.37135e-16
MX1	1		MX1	0		ZCCHC17	0.213696		IKZF4	-439		RAB3IL1	0.00262338		IDH3G	1.35075e-16
TOPORS	1		TOPORS	0		ZNF670	0.213696		ID3	-439		C14orf142	0.0025315		HEATR3	1.31838e-16
BAZ1B	1		BAZ1B	0		GTPBP2	0.213696		DBI	-439		TRIM69	0.00232962		DBI	1.31838e-16
SLC41A3	1		SLC41A3	0		NIF3L1	0.213592		F8	-439		PACSIN1	0.00226341		HERC1	1.30072e-16
LANCL2	1		LANCL2	0		TRIM69	0.213075		TMEM126B	-439		PACSIN2	0.00226341		PSME4	1.27718e-16
MAP4K2	1		MAP4K2	0		IKZF4	0.212355		MORF4L2	-439		FLOT1	0.00215789		ORC4	1.27718e-16
AGER	1		AGER	0		ID3	0.212355		SEC61G	-439		DOCK4	0.00205212		MRPS22	1.27424e-16
PRKCH	1		PRKCH	0		CHCHD2	0.211132		SLC2A3	-439		FARSA	0.00203361		PADI2	1.25364e-16
IL18	1		IL18	0		C9orf156	0.210325		PARP10	-439		EAPP	0.00191766		ZBTB18	1.23304e-16
GOT1	1		GOT1	0		USF2	0.210325		ZNF670	-439		ADAM33	0.00191766		ARSB	1.23304e-16
GBP1	1		GBP1	0		POLA2	0.209624		GALNT12	-439		ERP27	0.00190095		PARP10	1.2301e-16
ALDH18A1	1		ALDH18A1	0		SPATA2	0.209424		C14orf142	-439		HLA-E	0.00180081		TBCB	1.22421e-16
GLUD1	1		GLUD1	0		NHP2L1	0.209324		SOCS3	-439		TGFBR2	0.00178345		ALDH18A1	1.22421e-16
UBE2O	1		UBE2O	0		MICU1	0.209225		ZCCHC17	-439		ATG10	0.00176855		ARL6IP5	1.20067e-16
SLAMF6	1		SLAMF6	0		UGGT2	0.209225		GTPBP2	-439		KLRD1	0.00173977		SMYD4	1.20067e-16
MRPL43	1		MRPL43	0		CHMP2B	0.208927		BOLA1	-439		CORO1B	0.00169308		ICA1	1.20067e-16
IARS	1		IARS	0		C3	0.208828		EOMES	-439		ARPC4	0.00169308		PPP1R7	1.20067e-16
ZBTB18	1		ZBTB18	0		AAGAB	0.20863		BIN2	-439		CHCHD2	0.00167536		MLEC	1.19478e-16
SOX13	1		SOX13	0		CD5	0.208531		GZMH	-439		CD5	0.00166904		IARS	1.1889e-16
CYB561	1		CYB561	0		SLAMF1	0.208531		TDRD7	-439		SLAMF1	0.00166904		SOCS3	1.18301e-16
DRG1	1		DRG1	0		SLAMF6	0.208531		TRIM46	-439		SLAMF6	0.00166904		PTPN14	1.17713e-16
ZCCHC17	1		ZCCHC17	0		BIN2	0.208531		VRK3	-439		BTBD6	0.00164466		CRYZ	1.16535e-16
STAT6	1		STAT6	0		SOX13	0.207547		NDUFA13	-439		TAB3	0.00156231		TOPORS	1.16388e-16
PPP1R10	1		PPP1R10	0		TAB3	0.207547		BCAS3	-439		SOX13	0.00156231		NAIP	1.15653e-16
MICU1	1		MICU1	0		RBM19	0.206767		INTS3	-439		NDUFAB1	0.00145727		DIP2B	1.15358e-16
MED22	1		MED22	0		MAL	0.2058		CD82	-439		ZNF670	0.00142352		FANCF	1.11827e-16
RIMS3	1		RIMS3	0		TBCB	0.205607		PSMG2	-439		ZCCHC17	0.00142352		PLEK	1.08884e-16
WDTC1	1		WDTC1	0		NDUFAB1	0.205416		DUT	-439		GTPBP2	0.00142352		RALGAPA1	1.08296e-16
DBI	1		DBI	0		DAP3	0.204746		FIBCD1	-439		UBE2O	0.00141994		CCL4	1.0653e-16
UGGT2	1		UGGT2	0		OTUD5	0.204461		PCED1B	-439		AGER	0.00134344		BAZ1B	1.05941e-16
F8	1		F8	0		CRCP	0.203987		SERPING1	-439		RBM19	0.00134339		LGMN	1.02999e-16
XPO6	1		XPO6	0		MED22	0.202952		FAM83D	-439		C9orf156	0.00132025		TMEM126B	1.02999e-16
PSME4	1		PSME4	0		EIF2B2	0.202858		ICAM2	-439		EIF2B2	0.0013103		GFI1	1.02999e-16
PARP10	1		PARP10	0		TMEM126B	0.202858		CRYZ	-439		TMEM126B	0.0013103		APEH	1.0241e-16
ZNF670	1		ZNF670	0		MORF4L2	0.202858		MLEC	-439		MORF4L2	0.0013103		PPP1R10	1.01527e-16
TTLL5	1		TTLL5	0		SEC61G	0.202485		STAT6	-439		ZNF580	0.00115377		BIN2	1.00056e-16
NRBP1	1		NRBP1	0		SLC2A3	0.202485		ACOT7	-439		XRN2	0.00111055		NUP188	9.94672e-17
GALNT12	1		GALNT12	0		SLC41A3	0.202485		DNASE1L3	-439		HAUS8	0.00107973		GAA	9.91729e-17
SOCS3	1		SOCS3	0		CYB561	0.202485		LRRFIP2	-439		DAP3	0.00105241		FAM83D	9.77015e-17
USF2	1		USF2	0		RIMS3	0.202485		ORC4	-439		ICAM2	0.00103999		MYO1C	9.65243e-17
NDUFA13	1		NDUFA13	0		ZNF580	0.201927		TDP1	-439		MAL	0.00101604		MRPL43	9.59358e-17
WDR1	1		WDR1	0		HLA-E	0.200273		TOR1B	-439		TBCB	0.00100719		MORF4L2	9.47587e-17
UQCC2	1		UQCC2	0		KLRD1	0.200091		BAZ1B	-439		CRCP	0.00100419		GBP1	9.41701e-17
BIN2	1		BIN2	0		HAUS8	0.199366		MYO1C	-439		SLC41A3	0.000966615		TOR1B	9.24044e-17
GZMH	1		GZMH	0		XRN2	0.199005		NUDT3	-439		CYB561	0.000966615		ASH2L	9.24044e-17
CNNM3	1		CNNM3	0		AGER	0.198825		TAB3	-439		RIMS3	0.000966615		DOCK4	9.07858e-17
IDH3G	1		IDH3G	0		UBE2O	0.197575		SOX13	-439		SEC61G	0.000966615		AAGAB	9.06387e-17
EOMES	1		EOMES	0		CORO1B	0.197398		SGK223	-439		SLC2A3	0.000966615		LANCL2	8.91673e-17
SERPING1	1		SERPING1	0		ARPC4	0.197398		NCOA5	-439		TRMT10C	0.000925886		TXNDC17	8.82845e-17
RBM19	1		RBM19	0		ATP6V1G1	0.196604		POLD2	-439		KIAA0391	0.000925886		TDP1	8.71073e-17
CRYZ	1		CRYZ	0		LDLRAP1	0.196429		ARPC4	-439		MED22	0.000861264		SOX13	8.53416e-17
MLEC	1		MLEC	0		ARID5A	0.195295		MAP4K2	-439		CCL4	0.000854341		BCAS3	8.47531e-17
AAGAB	1		AAGAB	0		ICAM2	0.194949		FAM162A	-439		ARL6IP5	0.000854341		MANF	8.23988e-17
PCGF1	1		PCGF1	0		CCL4	0.194518		PCGF1	-439		PHF21A	0.0008514		POLD2	8.06331e-17
AAR2	1		AAR2	0		ARL6IP5	0.194518		FANCF	-439		XPO6	0.0008514		EPSTI1	7.85732e-17
NUDT3	1		NUDT3	0		PHF21A	0.194432		ASH2L	-439		OTUD5	0.00076805		AAR2	7.65132e-17
MYO1C	1		MYO1C	0		XPO6	0.194432		FBXL3	-439		STAT6	0.000732032		CLEC7A	7.53361e-17
STK40	1		STK40	0		TAP2	0.191638		FBXL14	-439		TAP2	0.000653919		LCN2	7.47475e-17
TAB3	1		TAB3	0		PPP1R7	0.190476		STK40	-439		ATP6V1G1	0.000590799		SLAMF1	7.40118e-17
SAFB	1		SAFB	0		STAT6	0.189819		PRIM1	-439		LDLRAP1	0.00058565		SLAMF6	7.13633e-17
PRIM1	1		PRIM1	0		CMSS1	0.189573		GZMA	-439		PPP1R7	0.000533325		ICAM2	6.94504e-17
SGK223	1		SGK223	0		GGA1	0.189085		ERP27	-439		CMSS1	0.000473562		NDUFA13	6.82733e-17
NCOA5	1		NCOA5	0		NDUFA13	0.188922		RNF4	-439		ARID5A	0.000471724		TAB3	6.76848e-17
POLD2	1		POLD2	0		POLD2	0.188922		COMMD6	-439		CREM	0.000447576		STAT6	6.70962e-17
TOR1B	1		TOR1B	0		BCAS3	0.188922		BTBD6	-439		NOA1	0.000387635		C14orf142	5.70906e-17
HAUS8	1		HAUS8	0		TRIM46	0.188922		MED12	-439		DTX3	0.000355		TRIM46	5.41478e-17
ICAM2	1		ICAM2	0		VRK3	0.188922		XPO6	-439		LCN2	0.000304989		VRK3	4.94393e-17
FANCF	1		FANCF	0		NOA1	0.188518		HERC1	-439		STK40	0.000299258		PRIM1	4.82622e-17
ASH2L	1		ASH2L	0		GNAI1	0.184641		MRPL43	-439		PRIM1	0.000299258		DUT	4.7085e-17
FBXL3	1		FBXL3	0		TRMT10C	0.184486		TBC1D10C	-439		GAA	0.00028853		STK40	4.7085e-17
FBXL14	1		FBXL14	0		KIAA0391	0.184486		ZNF440	-439		ORC4	0.000276979		CMSS1	2.44254e-17
GZMA	1		GZMA	0		SELPLG	0.183946		ARID3A	-439		GGA1	0.00027073		CRCP	2.94282e-19
ICA1	1		ICA1	0		DTX3	0.183639		SMOC1	-439		TRIM46	0.000268371		CHMP2B	2.94282e-19
COMMD6	1		COMMD6	0		CREM	0.183563		APEH	-439		VRK3	0.000268371		C3	0
BTBD6	1		BTBD6	0		MED12	0.183104		NUP188	-439		NDUFA13	0.000268371		CD5	0
HERC1	1		HERC1	0		LCN2	0.182119		RAB3IL1	-439		BCAS3	0.000268371		RNF38	0
APEH	1		APEH	0		AAR2	0.181969		HERC6	-439		POLD2	0.000268371		UACA	0
BCAS3	1		BCAS3	0		CLEC7A	0.181969		AAR2	-439		DUT	0.000262892		GTPBP3	0
NUP188	1		NUP188	0		GAA	0.180476		CCR7	-439		GNAI1	0.000249233		NT5C3A	0
RAB3IL1	1		RAB3IL1	0		ORC4	0.178789		MANF	-439		SELPLG	0.000203239		HBP1	0
HERC6	1		HERC6	0		STK40	0.173365		HAUS8	-439		CLEC7A	0.000179011		GNG2	0
TDP1	1		TDP1	0		PRIM1	0.173365		PLEK	-439		AAR2	0.000179011		CORO1B	0
CCR7	1		CCR7	0		DUT	0.173228		ZNF518A	-439		MED12	0.000166483		ZNF580	0
RNF4	1		RNF4	0		FIBCD1	0.170741		MBP	-439		NT5C3A	0.000136035		GP1BA	0
MANF	1		MANF	0		NT5C3A	0.170477		NRBP1	-439		FIBCD1	9.48463e-05		TNRC6C	0
ZNF518A	1		ZNF518A	0		LANCL2	0.169819		TTLL5	-439		LANCL2	7.16965e-05		PHF21A	0
MBP	1		MBP	0		ATP6V1E1	0.164363		AAGAB	-439		ATP6V1E1	5.51503e-05		F8	0
GTPBP2	1		GTPBP2	0		SH2D2A	0.163569		GFI1	-439		SH2D2A	4.44219e-05		BOLA1	0
CLEC7A	1		CLEC7A	0		F8	0.159074		CLEC7A	-439		RNF38	3.31388e-05		SERPING1	0
C14orf142	1		C14orf142	0		GNG2	0.155918		FBXW4	-439		F8	2.52723e-05		ACP6	-4.59815e-21
CD82	1		CD82	0		SELP	0.155642		WDR70	-439		GNG2	2.32656e-05		NUDT2	-1.83926e-20
PPP1R7	1		PPP1R7	0		RNF38	0.155203		C12orf76	-439		SELP	1.93086e-05		KIF13A	-7.35704e-20
TRIM46	1		TRIM46	0		SOCS3	0.14062		SAFB	-439		SOCS3	4.14673e-06		EIF2B2	-1.47141e-19
VRK3	1		VRK3	0		GP1BA	0.134721		PPP1R7	-439		GP1BA	1.80243e-06		MEF2A	-1.47141e-19
TXNDC17	1		TXNDC17	0		SERPING1	0.134721		TXNDC17	-439		SERPING1	1.80243e-06		PRF1	-2.94282e-19
